# Supplementary material
Source: MDPI journal article supplement (https://www.mdpi.com/2075-163X/11/9/929)

## Supplementary information S13

S13: Primary PARC imagery of example grains referred to in main text, showing grain population image, SEM-BSE image (greyscale) and PARC group image (phase map). Labels refer to PARC groups explained in supplementary file S2A. Quantitative analyses shown in S13D are for PARC groups from phase model B (S2B), where selected phases have been merged for purposes of quantifying chemistry. S13A-C show quantitative analyses of the sum-spectra from the {Pb-rich} group for each grain, together with their corresponding raw spectra.

S13A

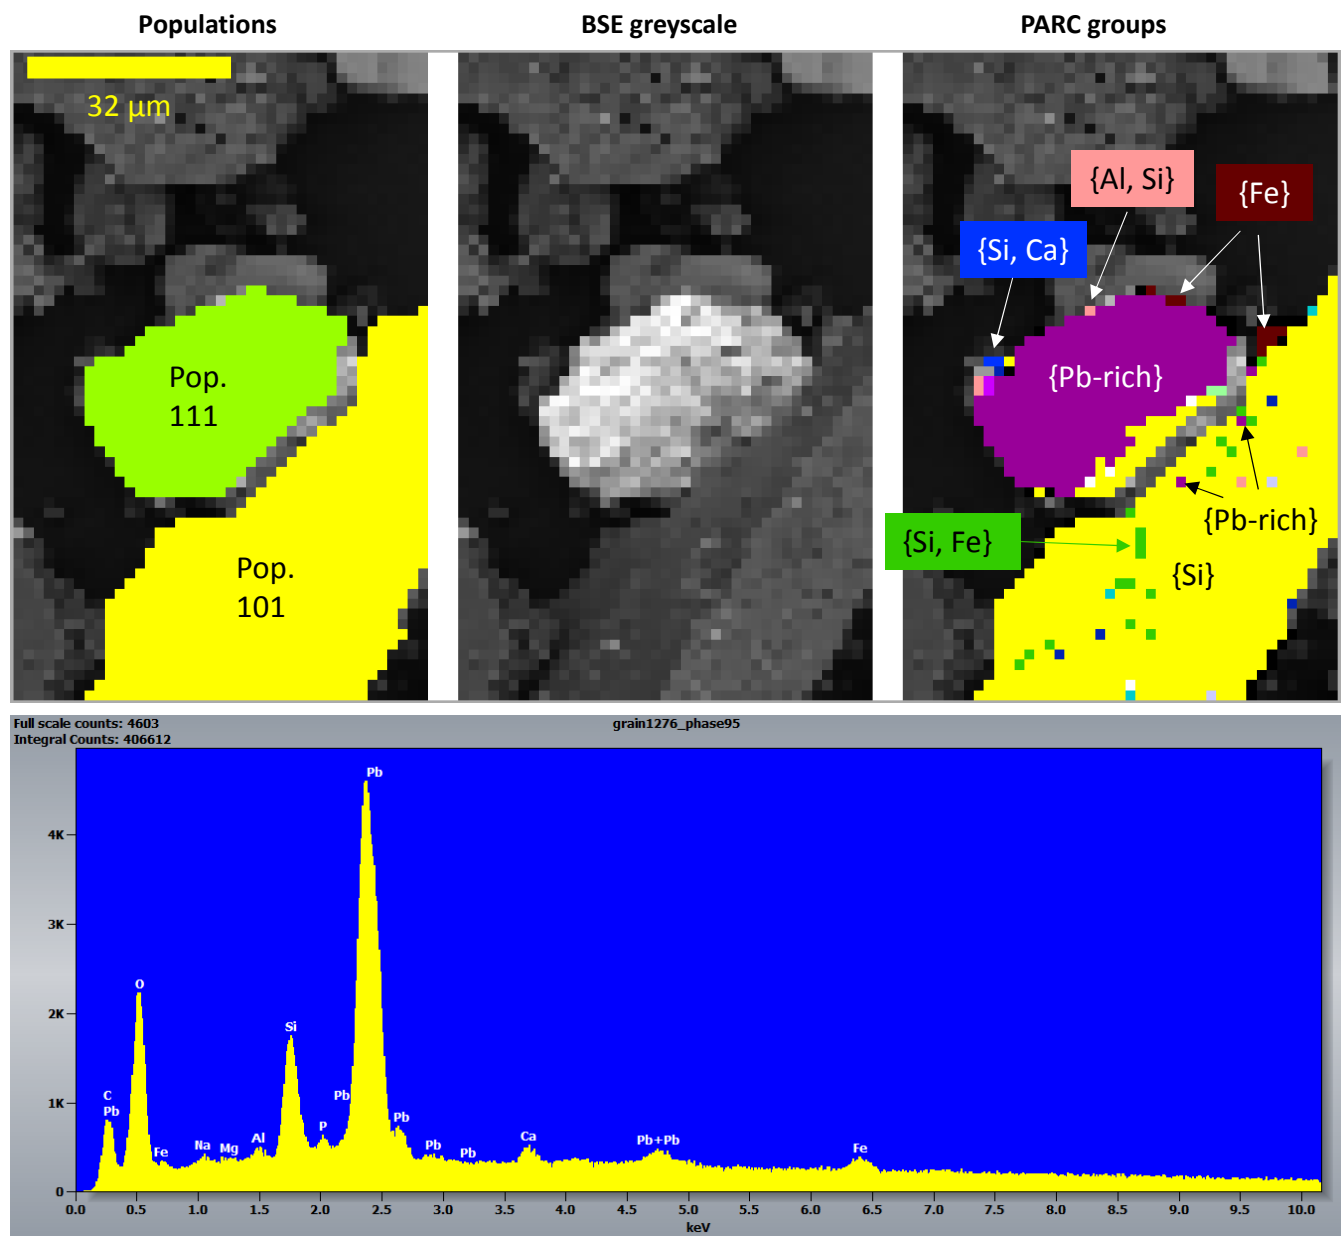

# Sum spectrum analysis (i) {Pb-rich} group in grain: 300 pixels

| grain 1276 |        |            |       |
|------------|--------|------------|-------|
| Net Counts |        | Compound % |       |
| C          | 6020   | CO2        | 0.00  |
| O          | 6747   | (null)     | 0.00  |
| Na         | 586    | Na2O       | 0.52  |
| Mg         | 295    | MgO        | 0.24  |
| Al         | 575    | Al2O3      | 0.45  |
| Si         | 12748  | SiO2       | 10.42 |
| P          | 1887   | P2O5       | 1.55  |
| S          | 0      | SO3        | 0.00  |
| Cl         | 1408   | Cl         | 0.87  |
| K          | 441    | K2O        | 0.35  |
| Ca         | 2395   | CaO        | 2.35  |
| Ti         | 0      | TiO2       | 0.00  |
| V          | 0      | V2O5       | 0.00  |
| Cr         | 362    | Cr2O3      | 0.64  |
| Mn         | 0      | MnO        | 0.00  |
| Fe         | 2506   | FeO        | 5.45  |
| Zn         | 0      | ZnO        | 0.00  |
| Ba         | 0      | BaO        | 0.00  |
| Pb         | 100403 | PbO        | 77.15 |

(ii)

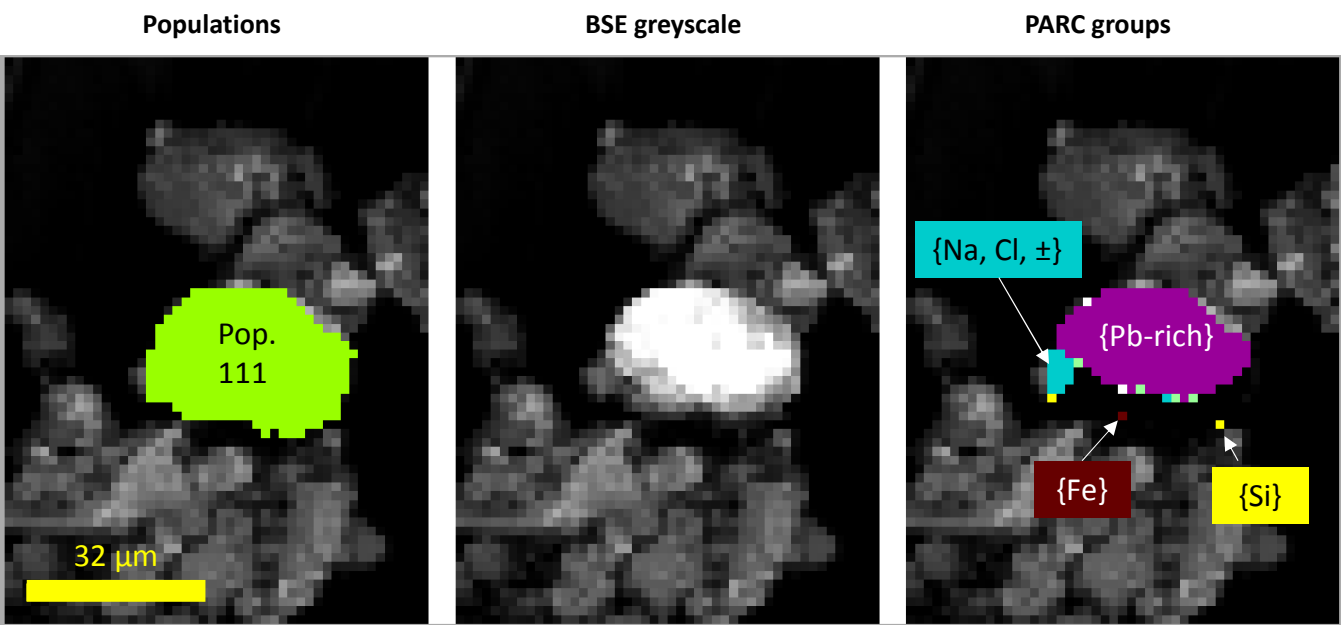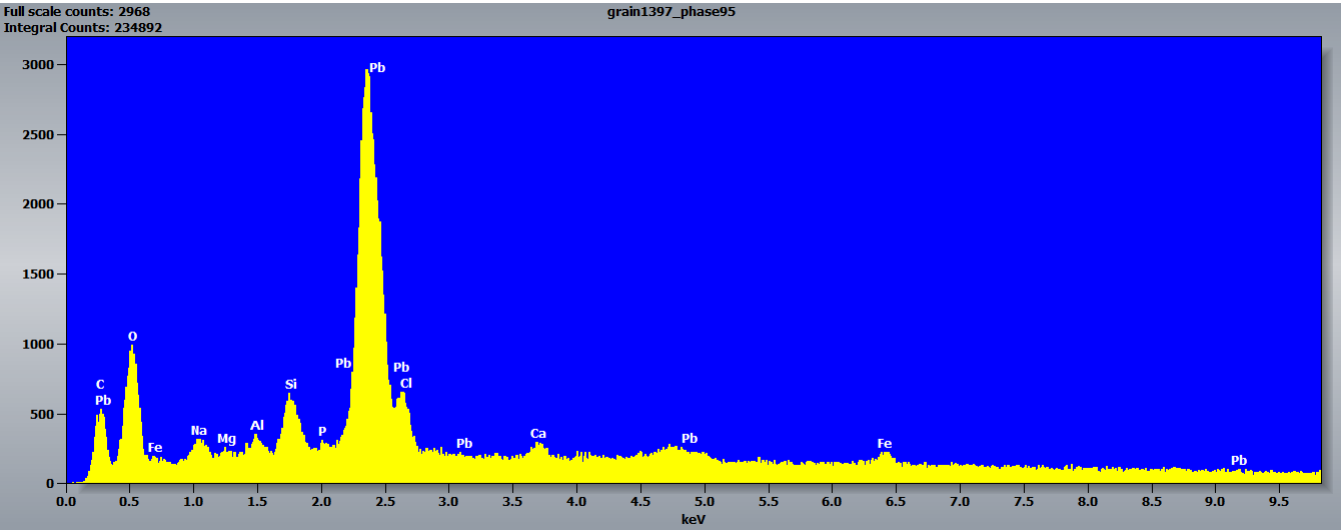

Sum spectrum analysis  
{Pb-rich} group in grain:  
189 pixels

| grain 1397 |       |                                |       |
|------------|-------|--------------------------------|-------|
| Net Counts |       | Compound                       | %     |
| C          | 3886  | CO <sub>2</sub>                | 0.00  |
| O          | 2532  | (null)                         | 0.00  |
| Na         | 890   | Na <sub>2</sub> O              | 1.23  |
| Mg         | 119   | MgO                            | 0.16  |
| Al         | 784   | Al <sub>2</sub> O <sub>3</sub> | 0.96  |
| Si         | 3565  | SiO <sub>2</sub>               | 4.60  |
| P          | 772   | P <sub>2</sub> O <sub>5</sub>  | 0.99  |
| S          | 6999  | SO <sub>3</sub>                | 9.64  |
| Cl         | 5124  | Cl                             | 4.88  |
| K          | 295   | K <sub>2</sub> O               | 0.37  |
| Ca         | 1228  | CaO                            | 1.89  |
| Ti         | 0     | TiO <sub>2</sub>               | 0.00  |
| V          | 197   | V <sub>2</sub> O <sub>5</sub>  | 0.64  |
| Cr         | 112   | Cr <sub>2</sub> O <sub>3</sub> | 0.32  |
| Mn         | 50    | MnO                            | 0.16  |
| Fe         | 1259  | FeO                            | 4.38  |
| Zn         | 197   | ZnO                            | 1.77  |
| Ba         | 27    | BaO                            | 0.07  |
| Pb         | 56677 | PbO                            | 67.94 |

S13B

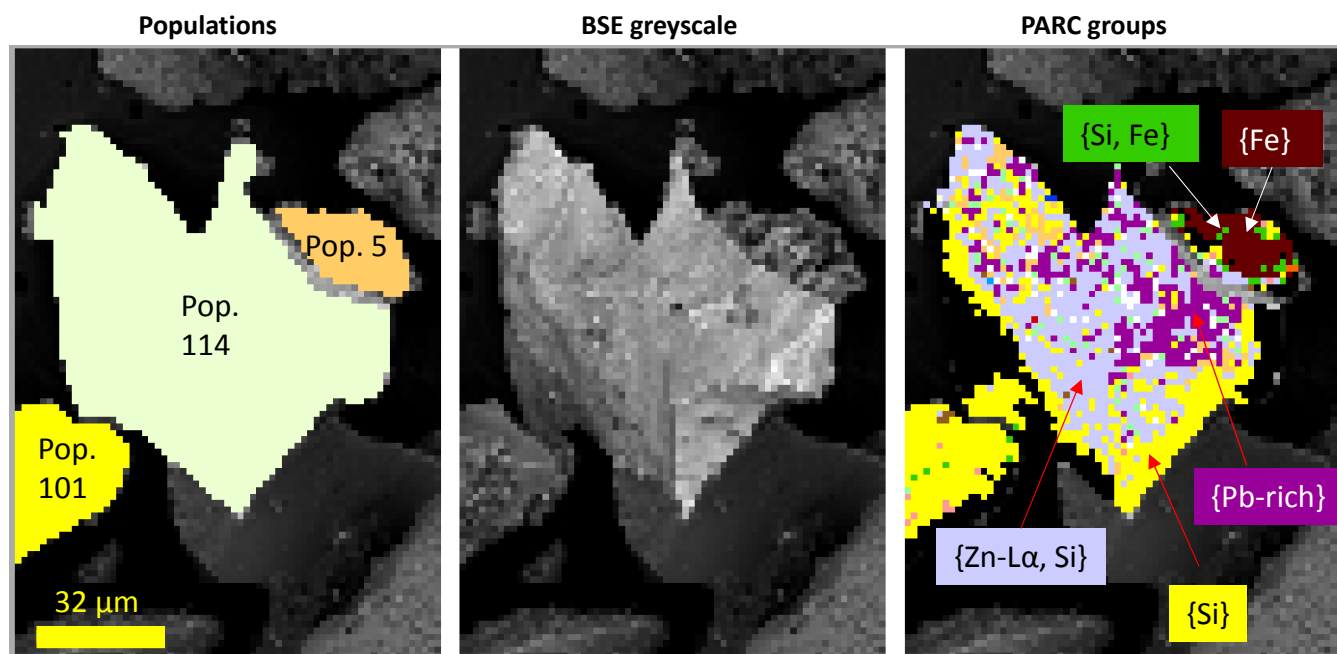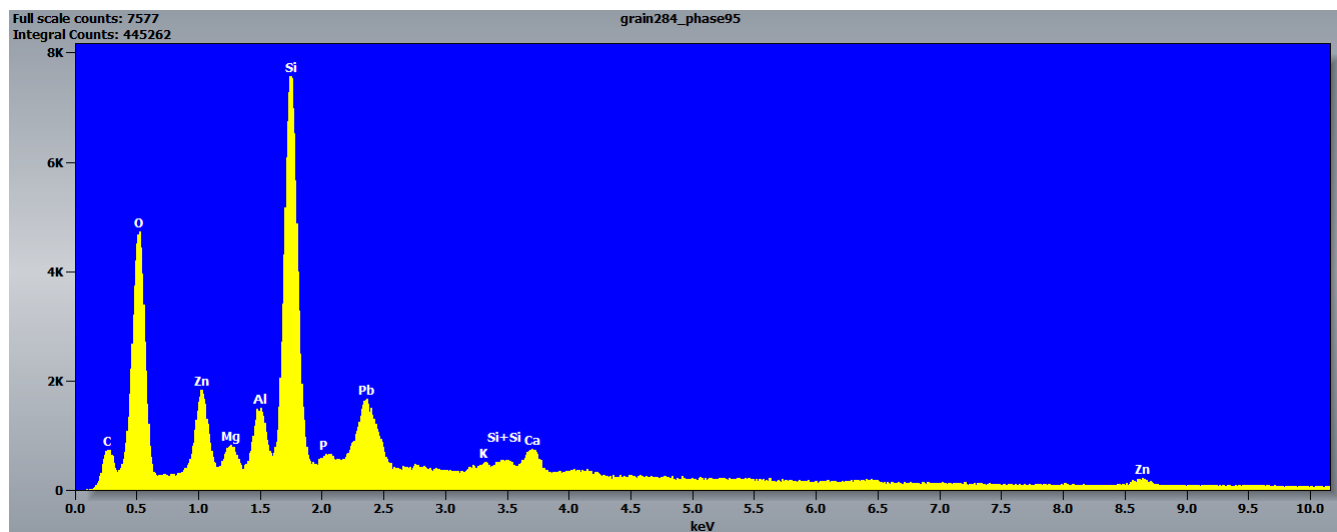

Sum spectrum analysis (i)  
 {Pb-rich} group in grain:  
 289 pixels

| grain 284  |       |                                |       |
|------------|-------|--------------------------------|-------|
| Net Counts |       | Compound %                     |       |
| C          | 5468  | CO <sub>2</sub>                | 0     |
| O          | 14632 | (null)                         | 0     |
| Na         | 3873  | Na <sub>2</sub> O              | 2.62  |
| Mg         | 4115  | MgO                            | 2.76  |
| Al         | 8396  | Al <sub>2</sub> O <sub>3</sub> | 5.37  |
| Si         | 70237 | SiO <sub>2</sub>               | 48.88 |
| P          | 1568  | P <sub>2</sub> O <sub>5</sub>  | 1.27  |
| S          | 2811  | SO <sub>3</sub>                | 2.36  |
| Cl         | 0     | Cl                             | 0     |
| K          | 0     | K <sub>2</sub> O               | 0     |
| Ca         | 5022  | CaO                            | 3.79  |
| Ti         | 198   | TiO <sub>2</sub>               | 0.26  |
| V          | 0     | V <sub>2</sub> O <sub>5</sub>  | 0     |
| Cr         | 148   | Cr <sub>2</sub> O <sub>3</sub> | 0.23  |
| Mn         | 0     | MnO                            | 0     |
| Fe         | 798   | FeO                            | 1.57  |
| Zn         | 2300  | ZnO                            | 12.5  |
| Ba         | 206   | BaO                            | 0.29  |
| Pb         | 24957 | PbO                            | 18.12 |

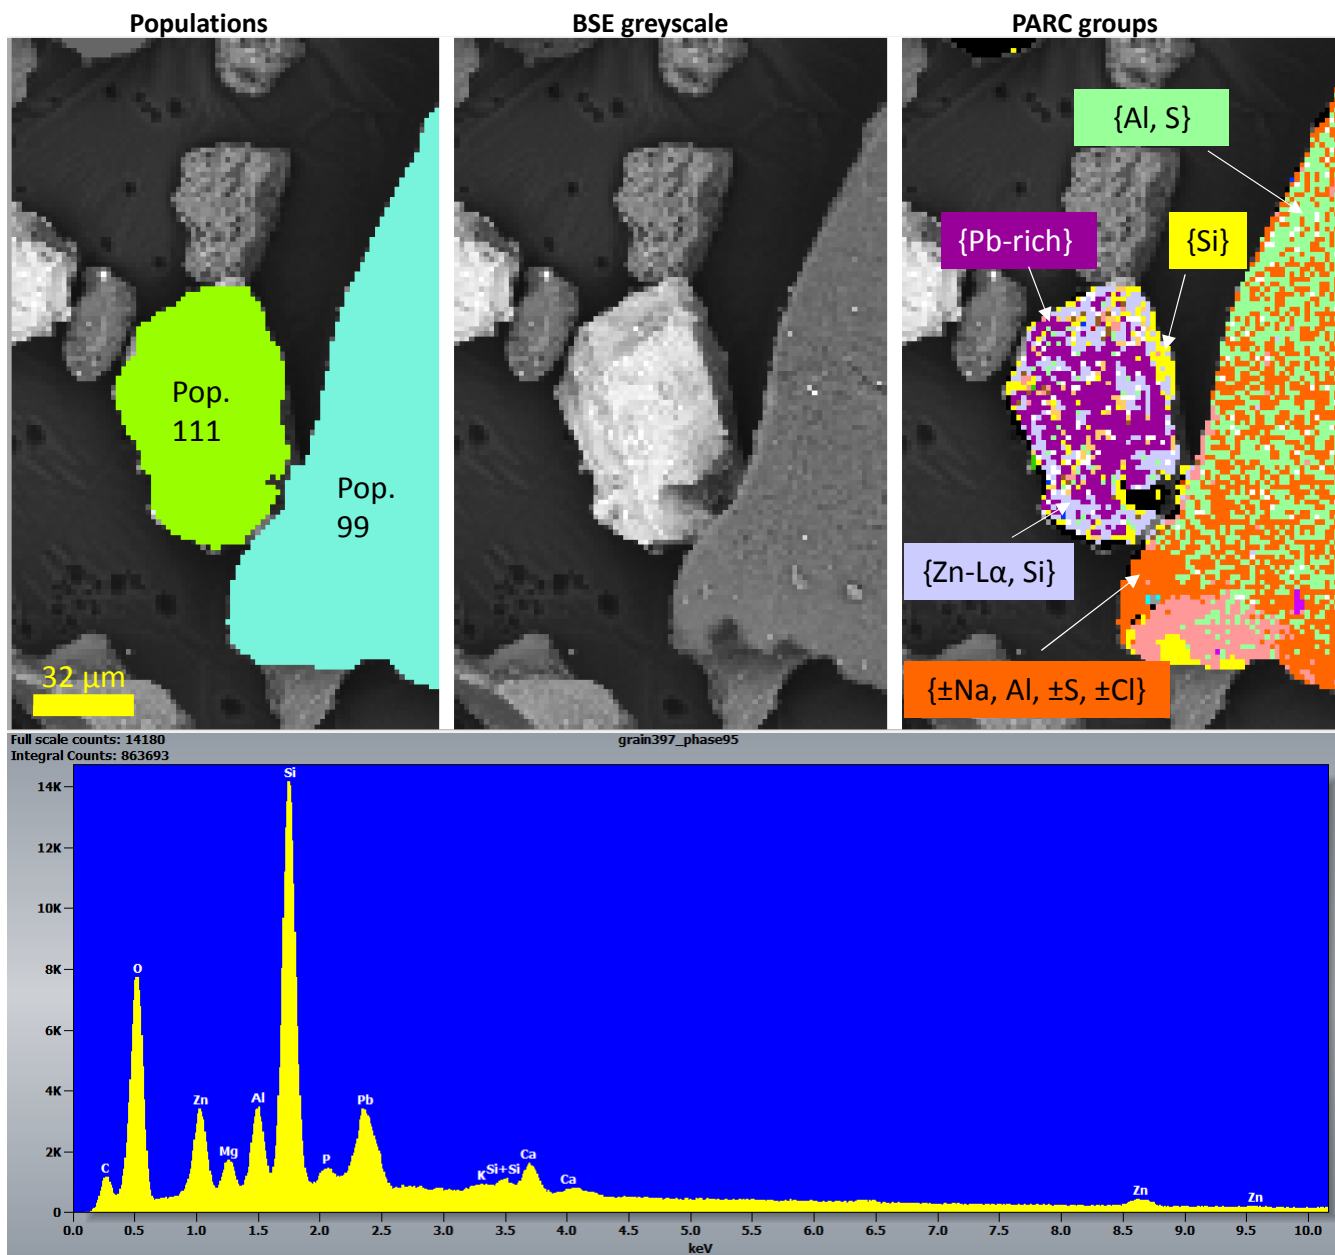

Sum spectrum analysis  
{Pb-rich} group in grain:  
570 pixels

(ii)

| grain 397  |        |                                |       |
|------------|--------|--------------------------------|-------|
| Net Counts |        | Compound %                     |       |
| C          | 8414   | CO <sub>2</sub>                | 0     |
| O          | 24128  | (null)                         | 0     |
| Na         | 8522   | Na <sub>2</sub> O              | 2.84  |
| Mg         | 8646   | MgO                            | 2.87  |
| Al         | 20819  | Al <sub>2</sub> O <sub>3</sub> | 6.58  |
| Si         | 130938 | SiO <sub>2</sub>               | 45.12 |
| P          | 4063   | P <sub>2</sub> O <sub>5</sub>  | 1.6   |
| S          | 2745   | SO <sub>3</sub>                | 1.12  |
| Cl         | 0      | Cl                             | 0     |
| K          | 0      | K <sub>2</sub> O               | 0     |
| Ca         | 10715  | CaO                            | 3.96  |
| Ti         | 437    | TiO <sub>2</sub>               | 0.28  |
| V          | 0      | V <sub>2</sub> O <sub>5</sub>  | 0     |
| Cr         | 478    | Cr <sub>2</sub> O <sub>3</sub> | 0.36  |
| Mn         | 198    | MnO                            | 0.17  |
| Fe         | 1360   | FeO                            | 1.3   |
| Zn         | 5062   | ZnO                            | 13.34 |
| Ba         | 422    | BaO                            | 0.29  |
| Pb         | 57099  | PbO                            | 20.18 |



(iii)

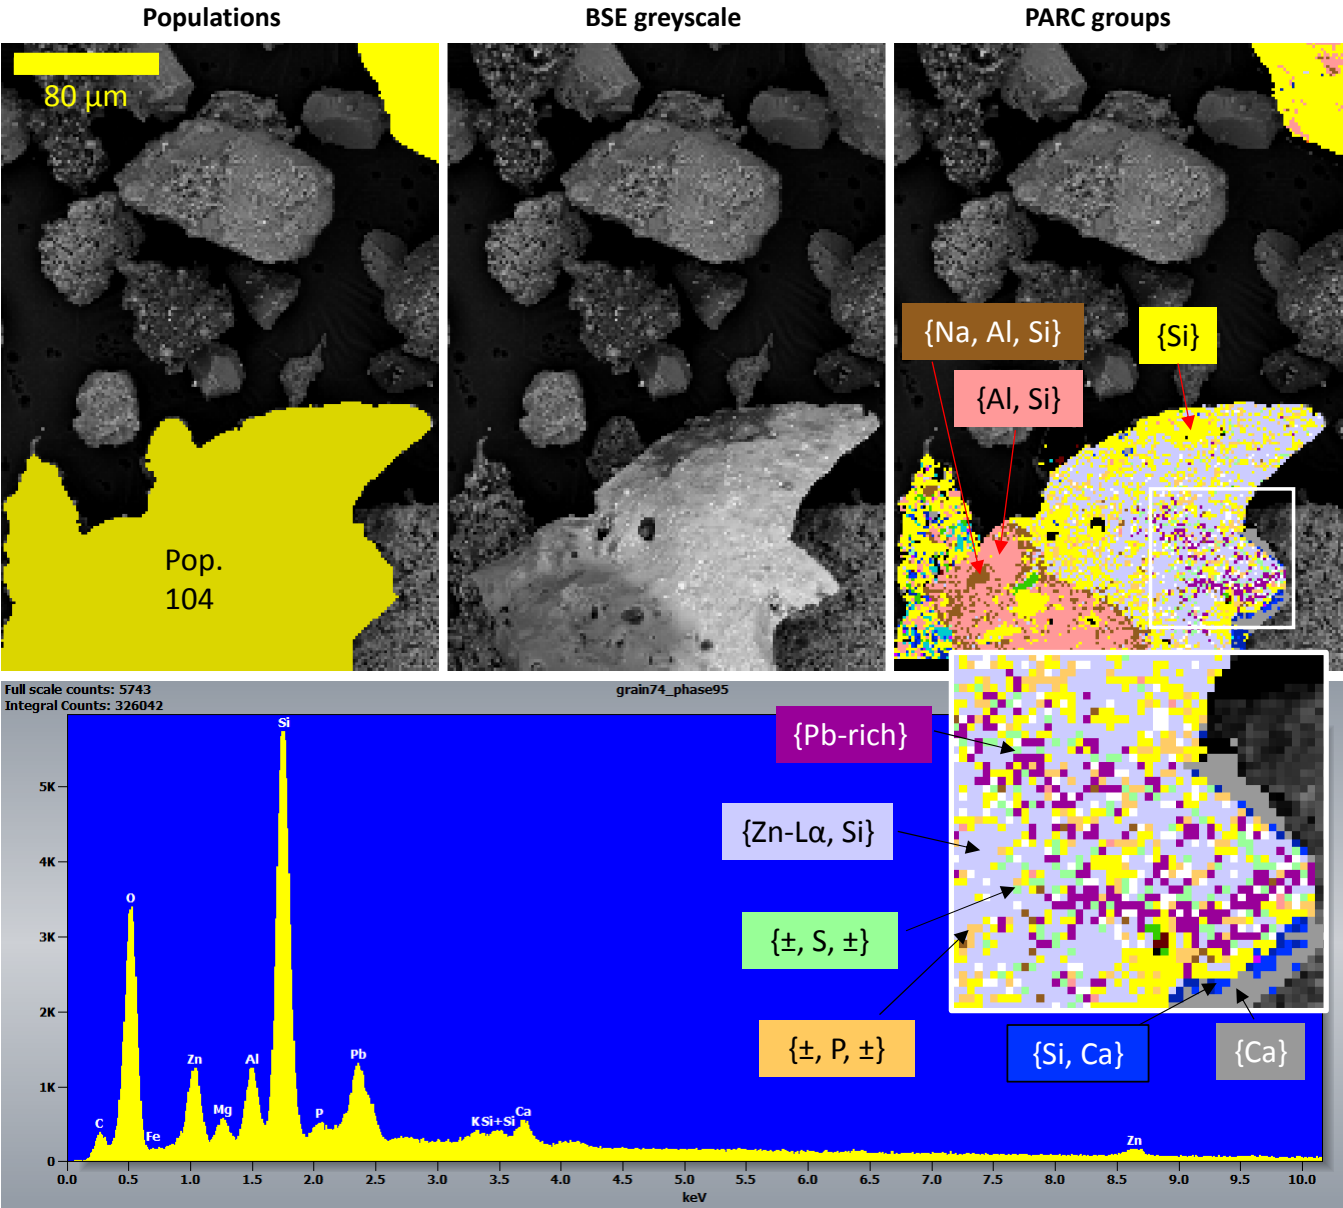

Sum spectrum analysis  
{Pb-rich} group in grain:  
244 pixels

| grain 74   |       |            |       |
|------------|-------|------------|-------|
| Net Counts |       | Compound % |       |
| C          | 2606  | CO2        | 0.00  |
| O          | 10604 | (null)     | 0.00  |
| Na         | 3487  | Na2O       | 2.96  |
| Mg         | 2600  | MgO        | 2.20  |
| Al         | 7453  | Al2O3      | 5.98  |
| Si         | 54703 | SiO2       | 47.83 |
| P          | 1262  | P2O5       | 1.27  |
| S          | 2102  | SO3        | 2.20  |
| Cl         | 0     | Cl         | 0.00  |
| K          | 444   | K2O        | 0.33  |
| Ca         | 3343  | CaO        | 3.15  |
| Ti         | 25    | TiO2       | 0.04  |
| V          | 0     | V2O5       | 0.00  |
| Cr         | 303   | Cr2O3      | 0.58  |
| Mn         | 0     | MnO        | 0.00  |
| Fe         | 503   | FeO        | 1.23  |
| Zn         | 1965  | ZnO        | 13.30 |
| Ba         | 366   | BaO        | 0.63  |
| Pb         | 20191 | PbO        | 18.29 |

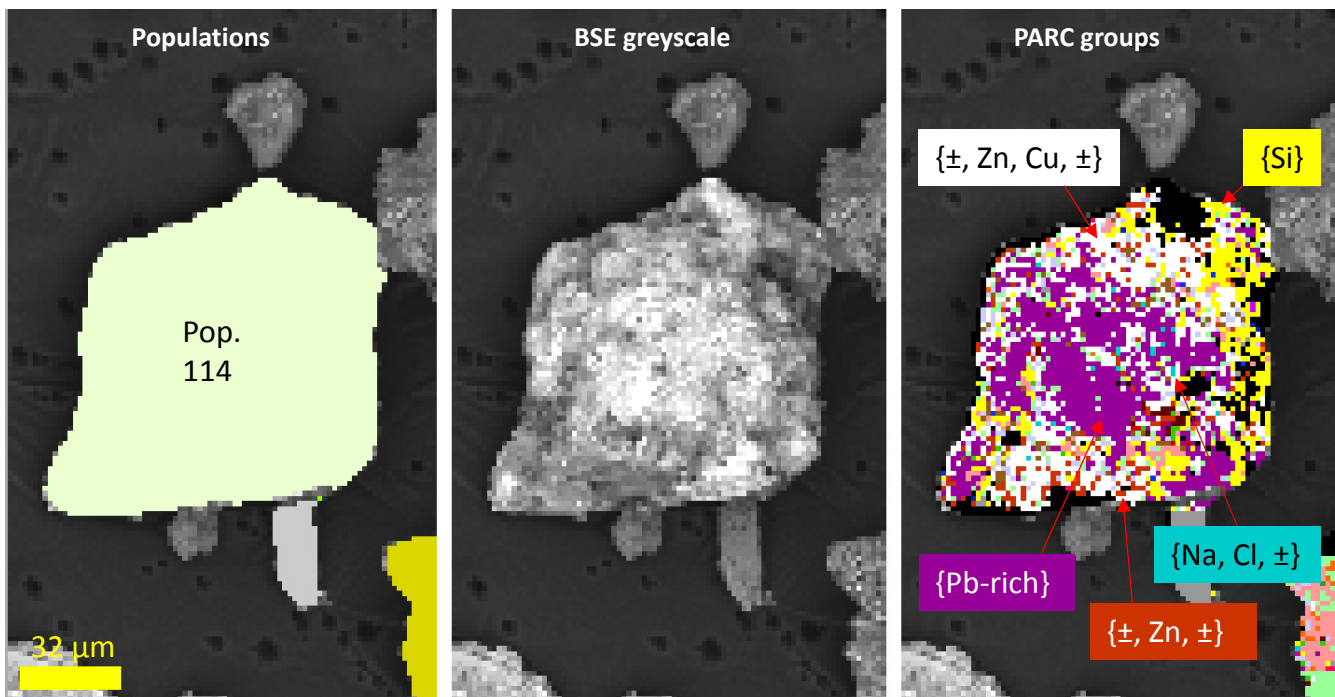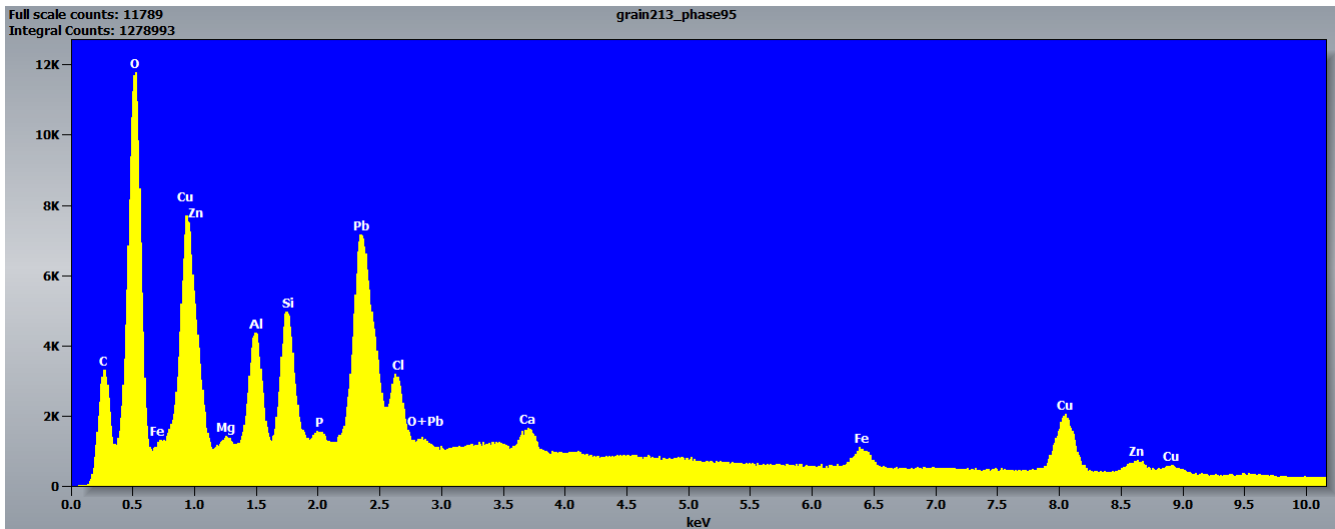

Sum spectrum analysis (iv)  
{Pb-rich} group in grain:  
991 pixels

| grain 213  |        |                                |       |
|------------|--------|--------------------------------|-------|
| Net Counts |        | Compound                       | %     |
| C          | 21928  | CO <sub>2</sub>                | 0.00  |
| O          | 38046  | (null)                         | —     |
| Na         | 0      | Na <sub>2</sub> O              | 0.00  |
| Mg         | 1824   | MgO                            | 0.46  |
| Al         | 29606  | Al <sub>2</sub> O <sub>3</sub> | 6.60  |
| Si         | 35380  | SiO <sub>2</sub>               | 8.11  |
| P          | 4509   | P <sub>2</sub> O <sub>5</sub>  | 1.00  |
| S          | 19675  | SO <sub>3</sub>                | 4.52  |
| Cl         | 25731  | Cl                             | 3.20  |
| K          | 0      | K <sub>2</sub> O               | 0.00  |
| Ca         | 8374   | CaO                            | 1.77  |
| Ti         | 236    | TiO <sub>2</sub>               | 0.09  |
| V          | 893    | V <sub>2</sub> O <sub>5</sub>  | 0.42  |
| Cr         | 7      | Cr <sub>2</sub> O <sub>3</sub> | 0.00  |
| Mn         | 286    | MnO                            | 0.14  |
| Fe         | 9285   | FeO                            | 4.82  |
| Cu         | 31489  | CuO                            | 34.46 |
| Zn         | 6689   | ZnO                            | 9.80  |
| Ba         | 1000   | BaO                            | 0.38  |
| Pb         | 121767 | PbO                            | 24.24 |

N.B. Cu not included as standard in other EDS analyses reported here

S13C

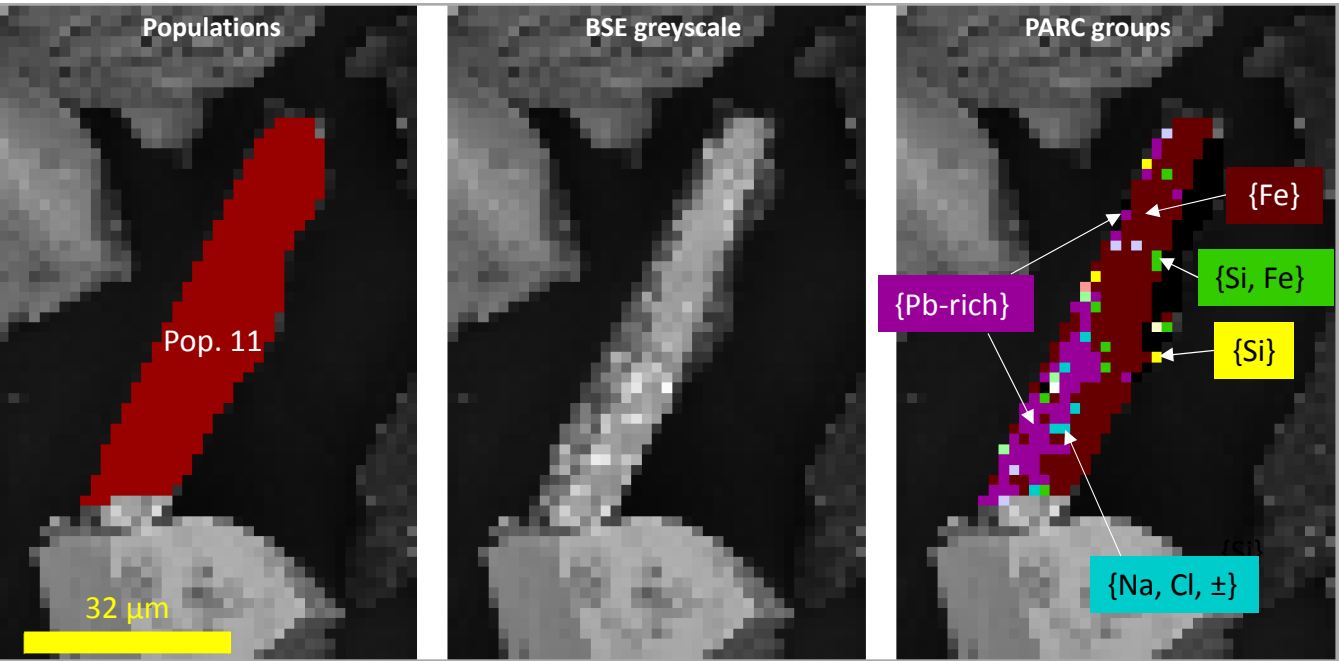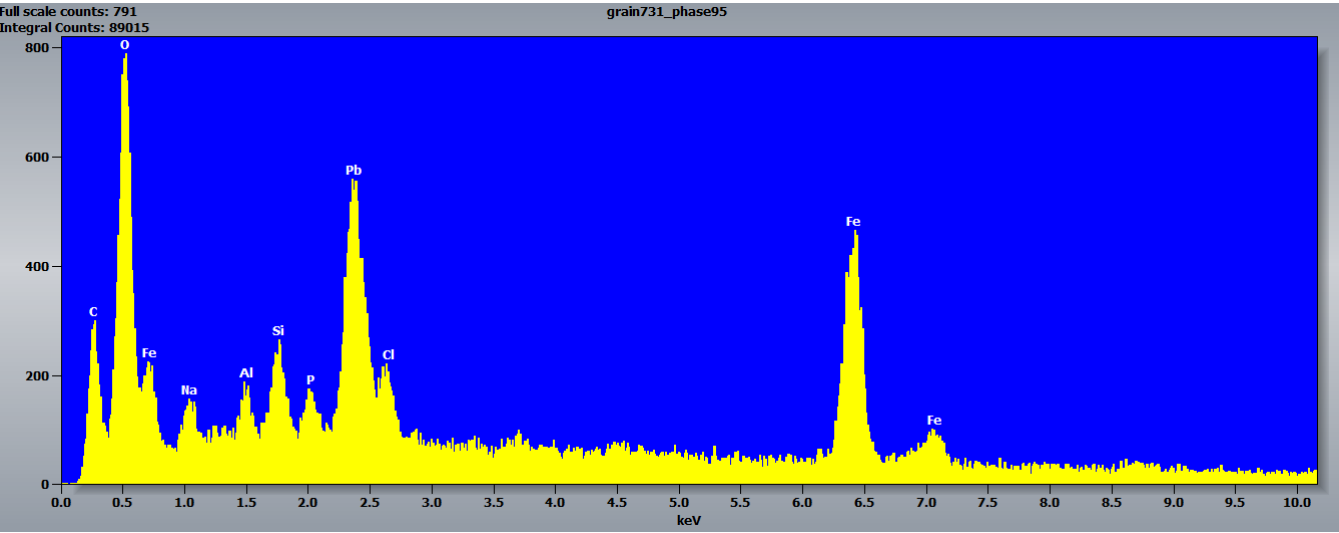

Sum spectrum analysis (i)  
 {Pb-rich} group in grain: 69 pixels

|            |       | grain731   |       |
|------------|-------|------------|-------|
| Net Counts |       | Compound % |       |
| C          | 2091  | CO2        | 0.00  |
| O          | 2463  | (null)     | 0.00  |
| Na         | 549   | Na2O       | 1.97  |
| Mg         | 0     | MgO        | 0.00  |
| Al         | 742   | Al2O3      | 2.09  |
| Si         | 1561  | SiO2       | 4.51  |
| P          | 922   | P2O5       | 2.58  |
| S          | 607   | SO3        | 1.80  |
| Cl         | 1732  | Cl         | 2.83  |
| K          | 177   | K2O        | 0.39  |
| Ca         | 277   | CaO        | 0.78  |
| Ti         | 187   | TiO2       | 0.90  |
| V          | 60    | V2O5       | 0.37  |
| Cr         | 31    | Cr2O3      | 0.17  |
| Mn         | 65    | MnO        | 0.43  |
| Fe         | 7227  | FeO        | 52.33 |
| Zn         | 95    | ZnO        | 1.90  |
| Ba         | 0     | BaO        | 0.00  |
| Pb         | 10483 | PbO        | 26.95 |

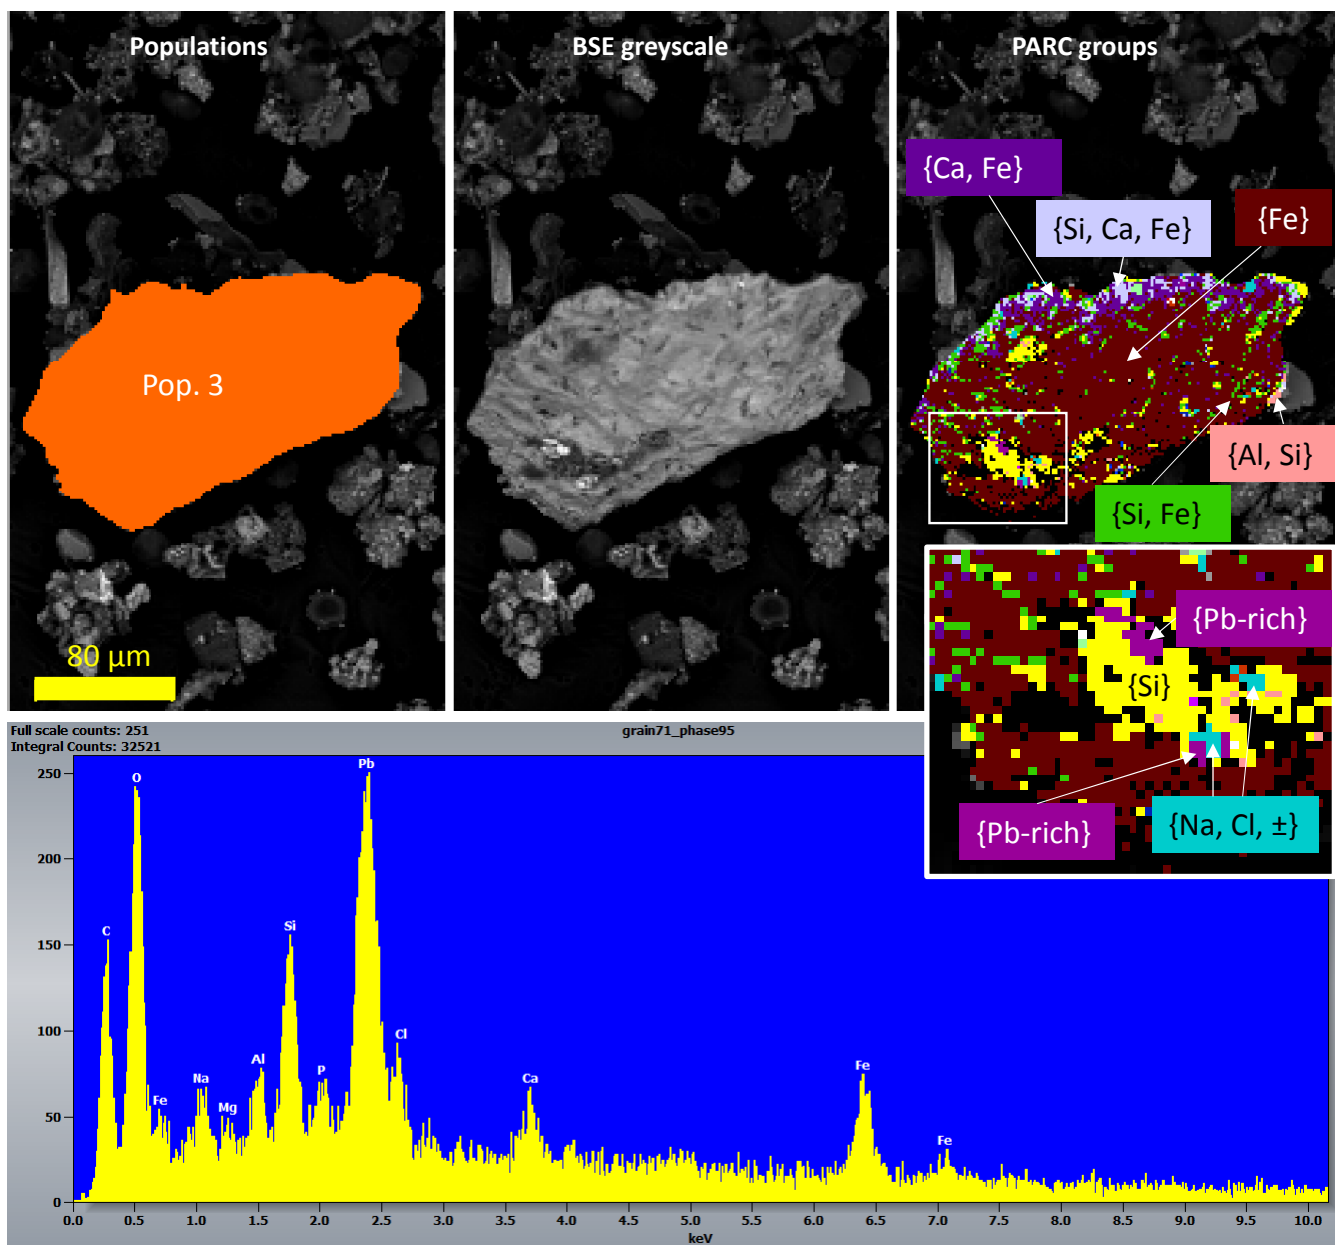

Sum spectrum analysis (iii)  
 {Pb-rich} group in grain: 34  
 pixels

| grain 71   |      |                                |       |
|------------|------|--------------------------------|-------|
| Net Counts |      | Compound %                     |       |
| C          | 1023 | CO <sub>2</sub>                | 0.00  |
| O          | 775  | (null)                         | 0.00  |
| Na         | 180  | Na <sub>2</sub> O              | 1.92  |
| Mg         | 79   | MgO                            | 0.77  |
| Al         | 314  | Al <sub>2</sub> O <sub>3</sub> | 2.84  |
| Si         | 1095 | SiO <sub>2</sub>               | 10.39 |
| P          | 373  | P <sub>2</sub> O <sub>5</sub>  | 3.55  |
| S          | 86   | SO <sub>3</sub>                | 0.88  |
| Cl         | 544  | Cl                             | 3.32  |
| K          | 45   | K <sub>2</sub> O               | 0.37  |
| Ca         | 387  | CaO                            | 3.98  |
| Ti         | 0    | TiO <sub>2</sub>               | 0.00  |
| V          | 105  | V <sub>2</sub> O <sub>5</sub>  | 2.37  |
| Cr         | 17   | Cr <sub>2</sub> O <sub>3</sub> | 0.34  |
| Mn         | 70   | MnO                            | 1.59  |
| Fe         | 929  | FeO                            | 23.37 |
| Zn         | 10   | ZnO                            | 0.71  |
| Ba         | 15   | BaO                            | 0.27  |
| Pb         | 4902 | PbO                            | 43.35 |

S13D

## Quantitative EDS analysis

### Sum spectrum analysis – whole grain

| Na2O wt% | MgO wt% | Al2O3 wt% | SiO2 wt% | P2O5 wt% | SO3 wt% | Cl wt% | K2O wt% | CaO wt% | TiO2 wt% | V2O5 wt% | Cr2O3 wt% | MnO wt% | FeO wt% | ZnO wt% | BaO wt% | PbO wt% |
|----------|---------|-----------|----------|----------|---------|--------|---------|---------|----------|----------|-----------|---------|---------|---------|---------|---------|
| 6.61     | 0       | 2.67      | 4.64     | 2.8      | 3.33    | 1.49   | 0.32    | 1.46    | 0.07     | 0.23     | 0.07      | 0.04    | 4.38    | 62.84   | 0       | 9.05    |

### Constituent PARC groups

| Na2O wt% | MgO wt% | Al2O3 wt% | SiO2 wt% | P2O5 wt% | SO3 wt% | Cl wt% | K2O wt% | CaO wt% | TiO2 wt% | V2O5 wt% | Cr2O3 wt% | MnO wt% | FeO wt% | ZnO wt% | BaO wt% | PbO wt% | PARC group                             | n pixels |
|----------|---------|-----------|----------|----------|---------|--------|---------|---------|----------|----------|-----------|---------|---------|---------|---------|---------|----------------------------------------|----------|
| 7.67     | 0       | 2.46      | 3.42     | 2.6      | 2.04    | 1.44   | 0.23    | 0.54    | 0.07     | 0.21     | 0.05      | 0.04    | 3.54    | 70.25   | 0       | 5.46    | {Zn-LA1}                               | 1832     |
| 5.19     | 0       | 2.34      | 4.49     | 4.35     | 1.36    | 1.88   | 0.36    | 0.63    | 0.12     | 0.35     | 0         | 0.24    | 4.03    | 49.37   | 0.29    | 24.99   | {Pb-rich}                              | 426      |
| 5.88     | 0       | 5.47      | 13.75    | 2.73     | 2.61    | 1.41   | 0.64    | 0.74    | 0        | 0.56     | 0.09      | 0.17    | 6.71    | 54.21   | 0       | 5.03    | {Na, Si}*                              | 219      |
| 4.3      | 0       | 1.83      | 4.47     | 2.13     | 15.78   | 1.44   | 0.63    | 9.64    | 0.15     | 0.09     | 0.33      | 0       | 3.43    | 45.44   | 0       | 10.35   | { $\pm$ , S, $\pm$ }                   | 210      |
| 1.5      | 0       | 0.54      | 4.28     | 0.64     | 49.52   | 0.55   | 0.55    | 33.98   | 0.14     | 0        | 0         | 0       | 0.77    | 5.82    | 0       | 1.71    | {S, Ca}                                | 22       |
| 4.27     | 0.28    | 1.16      | 3.6      | 1.62     | 1.97    | 0.51   | 0       | 1.17    | 0        | 0        | 0         | 0       | 49.72   | 31.2    | 2.38    | 2.13    | {Zn-LA1, Fe}                           | 22       |
| 4.32     | 0       | 1.68      | 4.53     | 3.09     | 0       | 1.27   | 0.47    | 1.09    | 0        | 0.8      | 0.28      | 0       | 6.53    | 55.84   | 1.06    | 19.04   | {unclassified}                         | 21       |
| 4.82     | 0       | 14.64     | 18.54    | 2.93     | 2.81    | 1.48   | 0.9     | 0.92    | 0        | 0        | 0.63      | 0.11    | 8.08    | 40.87   | 0       | 3.26    | { $\pm$ Na, Al, Si, $\pm$ K, $\pm$ Ca} | 18       |
| 1.13     | 7.69    | 10.27     | 43.02    | 0.88     | 5.38    | 0.55   | 1.16    | 8.05    | 0        | 0.93     | 0         | 5.15    | 2.15    | 12.64   | 0.99    | 0       | {Si}                                   | 7        |
| 7.14     | 0       | 7.93      | 5.83     | 3.33     | 2.06    | 0.88   | 1.21    | 0       | 1.12     | 0        | 0         | 0       | 6.26    | 59.27   | 0.52    | 4.43    | {Na, Al}                               | 6        |
| 0        | 0.83    | 0.87      | 2.93     | 0.29     | 1.84    | 0.23   | 0       | 1.43    | 0.1      | 0        | 0         | 2.5     | 81.66   | 6.54    | 0       | 0.79    | {Fe}                                   | 2        |
| 7.23     | 1.12    | 0.7       | 1.75     | 1.31     | 1.79    | 0      | 1.35    | 25.38   | 0.95     | 0        | 0         | 4.33    | 1.79    | 52.31   | 0       | 0       | {Na, Ca}                               | 1        |
| 0        | 0       | 3.02      | 14       | 0        | 0.91    | 0.82   | 0       | 0.23    | 0        | 0        | 3.95      | 1.01    | 45.22   | 23      | 4.77    | 3.06    | {Zn-LA1, Si, Fe}                       | 1        |

\*{Na, Si} in this grain is in fact {Zn-LA1, Si}, i.e. the signal is dominated by Zn rather than Na. This phase is labelled {Zn, Si} in the PARC image.

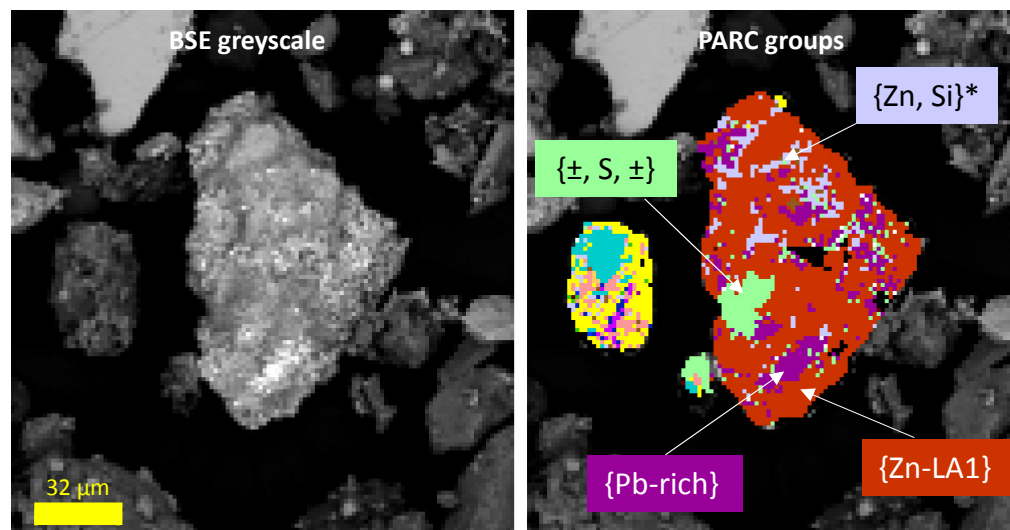

Supplement: s1 [file s1]
