# Supplementary material
Source: MDPI journal article supplement (https://www.mdpi.com/2075-163X/11/9/929)
Supplement: s1 [file s1]

S7: Video with slideshow of the generated PARC imagery for all samples, showing a triplicate of analysed areas (a-c) per sample. For each sample, the following images are shown, covering the whole analysed area (approx. 2.5 mm wide):

- Greyscale SEM-BSE
- PARC groups, with legend showing top 20 most abundant groups and their net area % (with respect to total analysed area, excluding empty spectra pixels. N.B. area percentages given in manuscript and S9 are reported with respect to total analysed grain area per sample analysis, excluding all pixels falling outside the grain mask but not excluding empty spectra unless otherwise indicated)
- Grain populations, with legends showing: first, populations grouped by source material (detailed); second, grouped by source category, as referred to in main text.
- Miniature versions of the previous images, showing only those grain populations and grains with occurrence of Pb-rich pixels

See supplementary file S2 for details of PARC groups, S3 for documentation of grain populations.

Combined tables of PARC group and grain population abundances are given in supplementary files S8 and S9 respectively.

Time-stamps of samples (mm:ss):

|           |       |
|-----------|-------|
| Sample 01 | 00:00 |
| Sample 02 | 00:36 |
| Sample 03 | 01:12 |
| Sample 05 | 01:49 |
| Sample 06 | 02:25 |
| Sample 07 | 03:01 |
| Sample 08 | 03:37 |
| Sample 09 | 04:14 |
| Sample 10 | 05:02 |
| Sample 11 | 05:38 |
| Sample 12 | 06:15 |
| Sample 13 | 06:50 |
| Sample 14 | 07:26 |
| Sample 15 | 08:03 |
| Sample 17 | 08:39 |
| Sample 18 | 09:15 |
| Sample 21 | 09:52 |
| Sample 22 | 10:28 |
| Sample 23 | 11:04 |
| Sample 24 | 11:41 |
| Sample 25 | 12:17 |
| Sample 26 | 12:53 |
| Sample 27 | 13:30 |

|           |       |
|-----------|-------|
| Sample 28 | 14:05 |
| Sample 29 | 14:41 |
| Sample 30 | 15:18 |
| Sample 31 | 15:54 |
| Sample 32 | 16:31 |
| Sample 33 | 17:07 |
| Sample 35 | 17:43 |
| Sample 36 | 18:19 |
