# Supplementary material
Source: MDPI journal article supplement (https://www.mdpi.com/2075-163X/11/9/929)

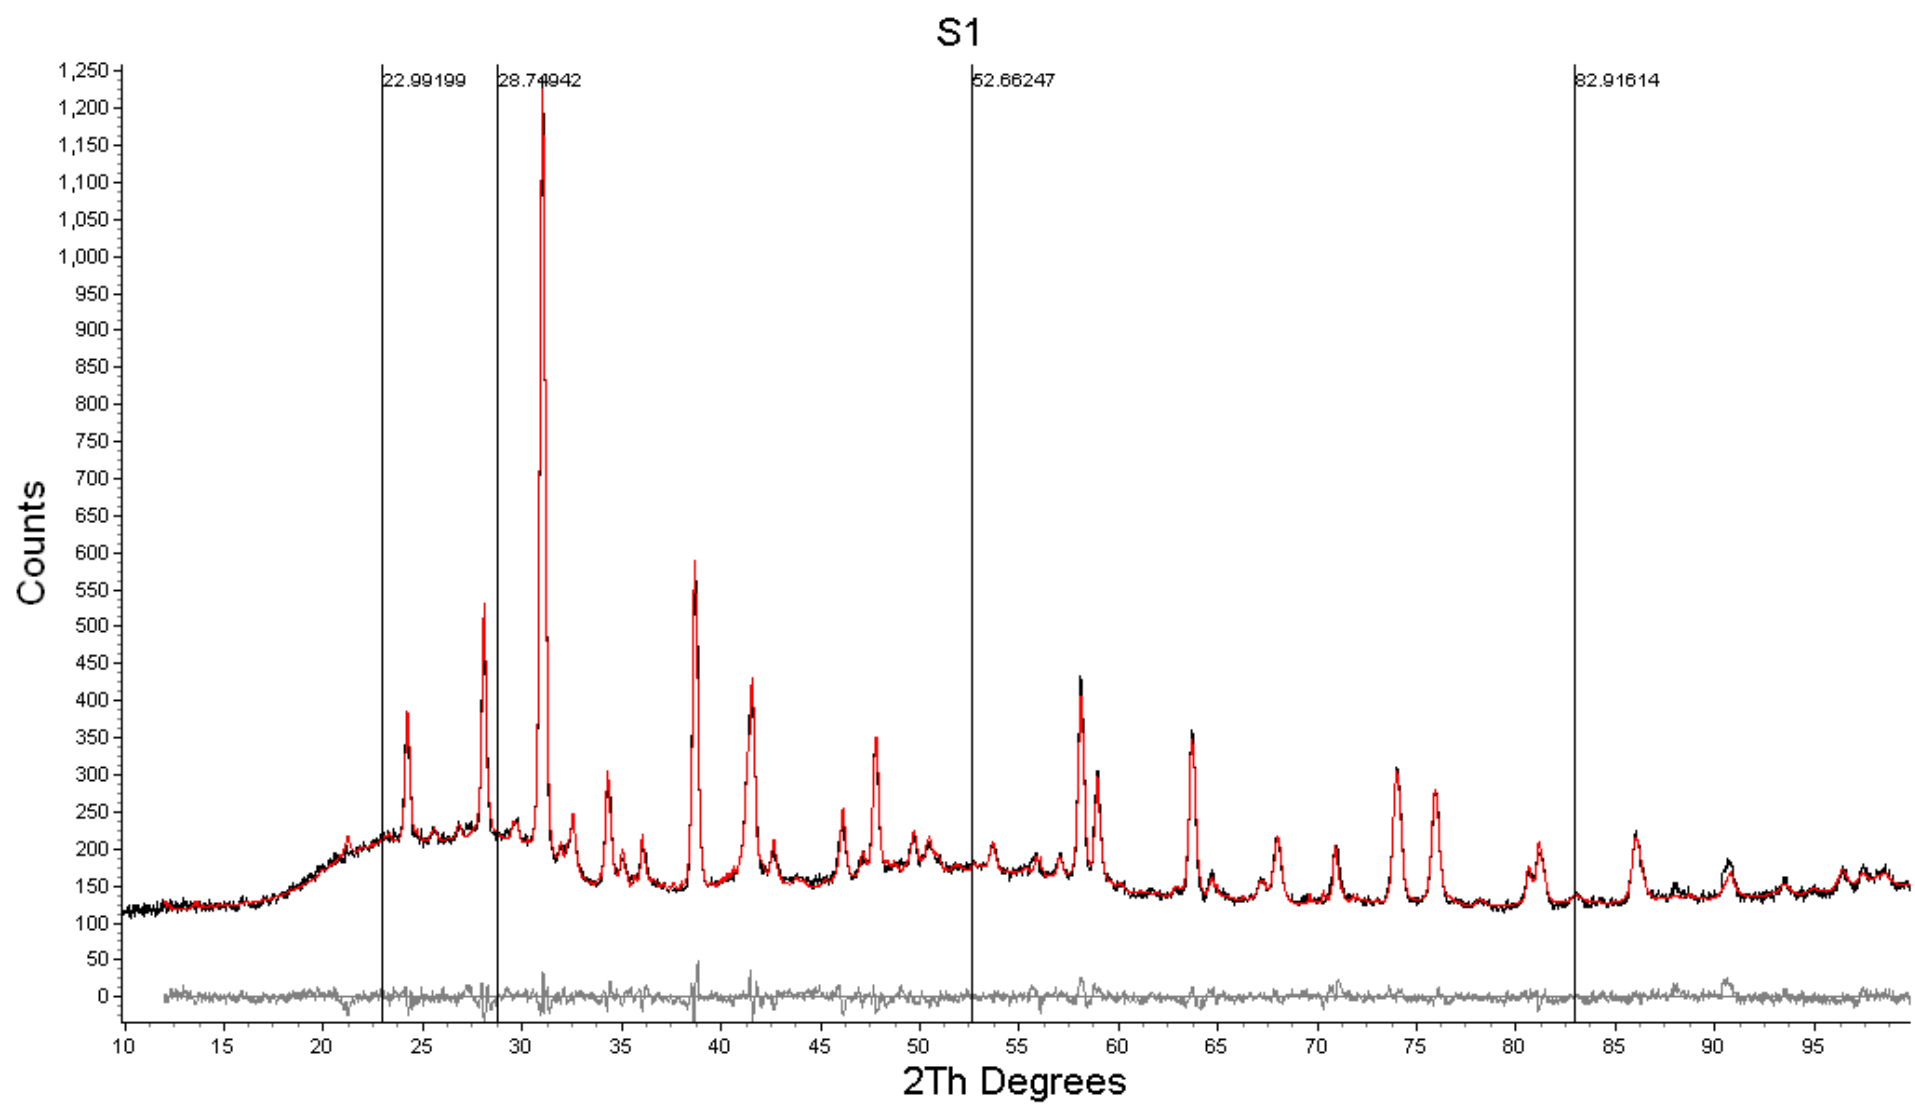

S2

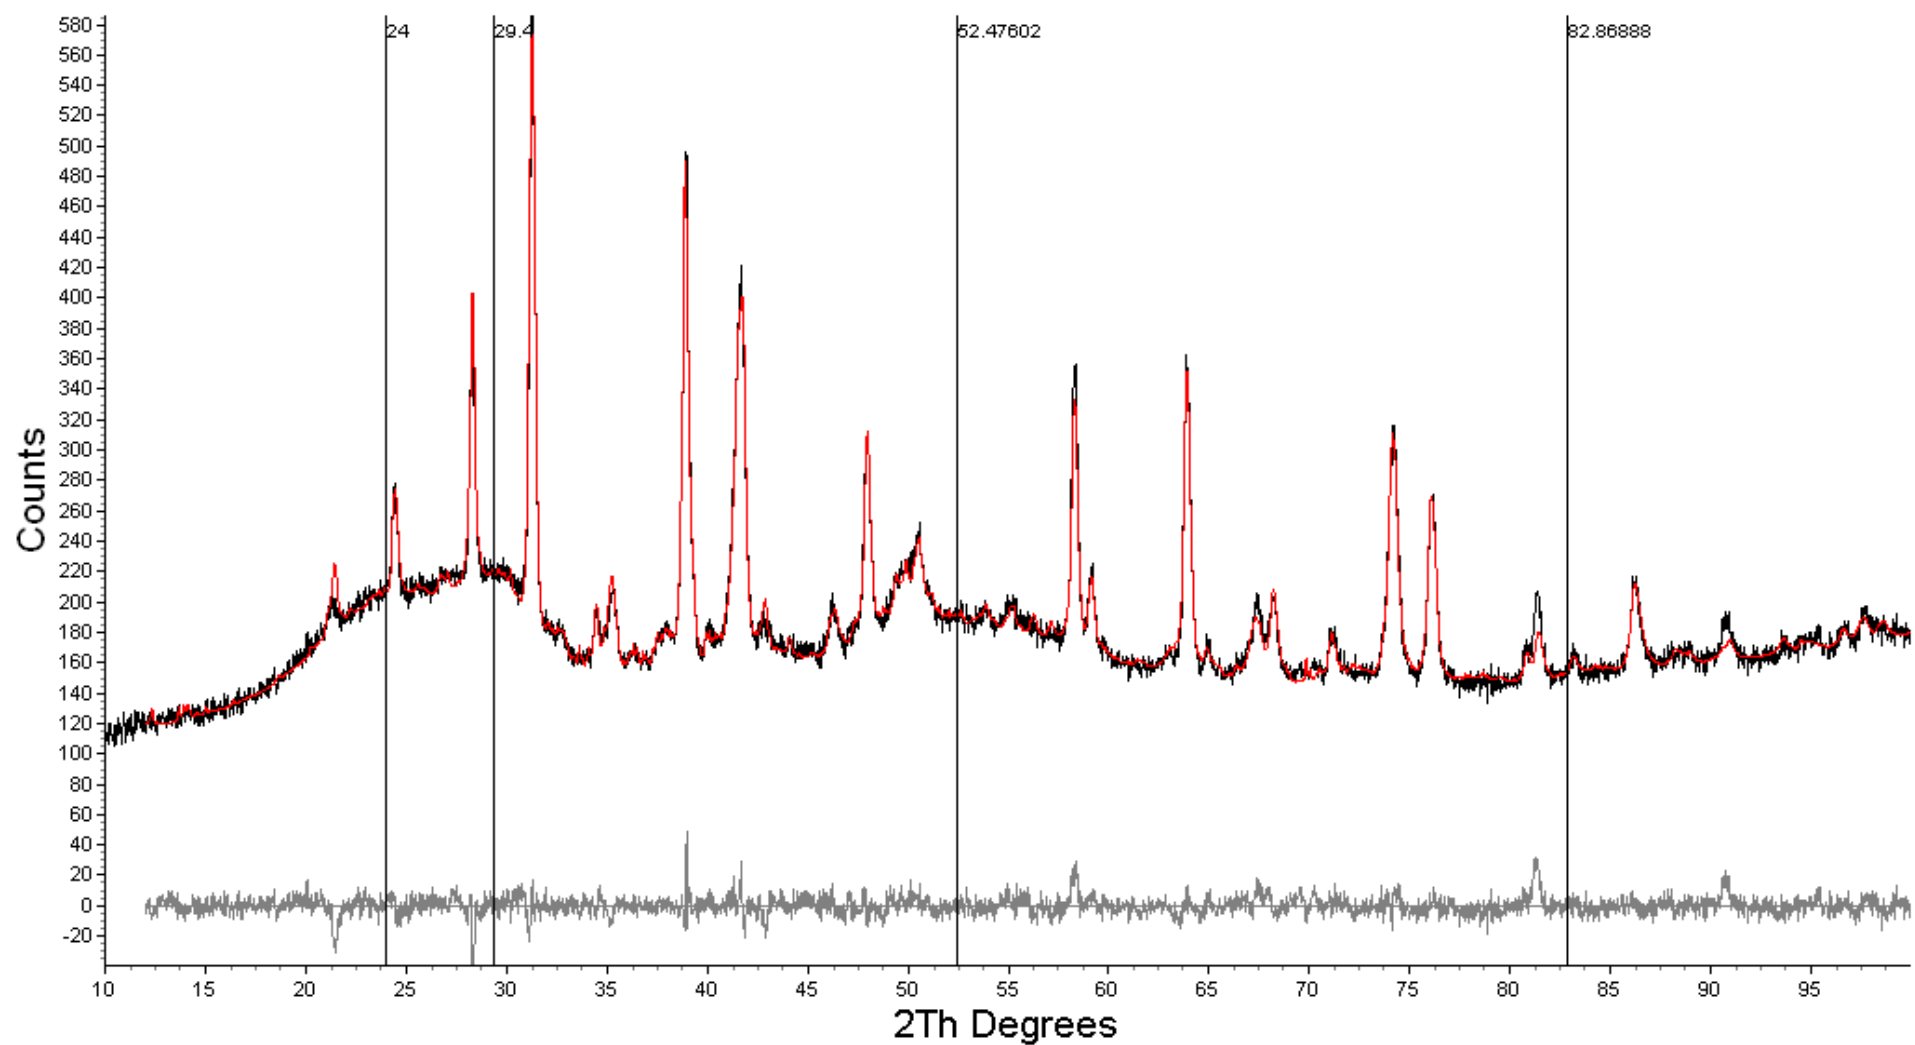

S3

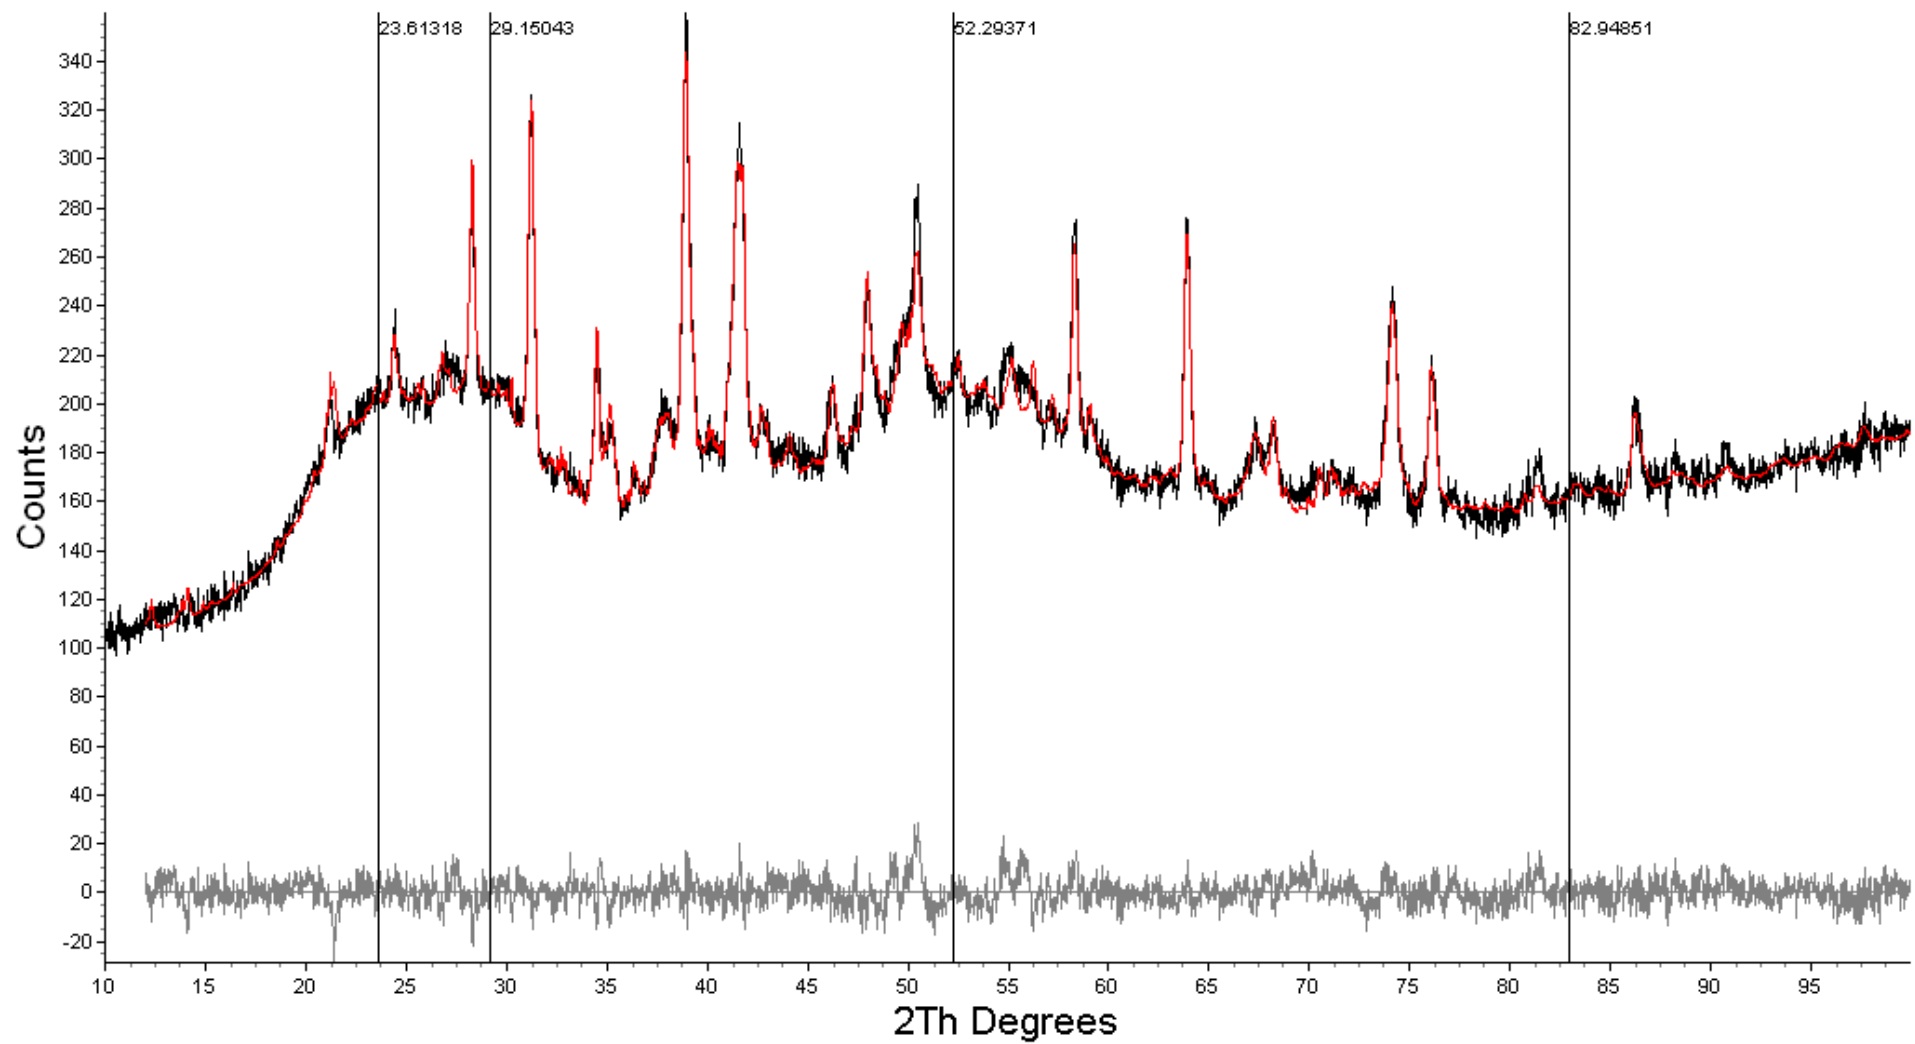

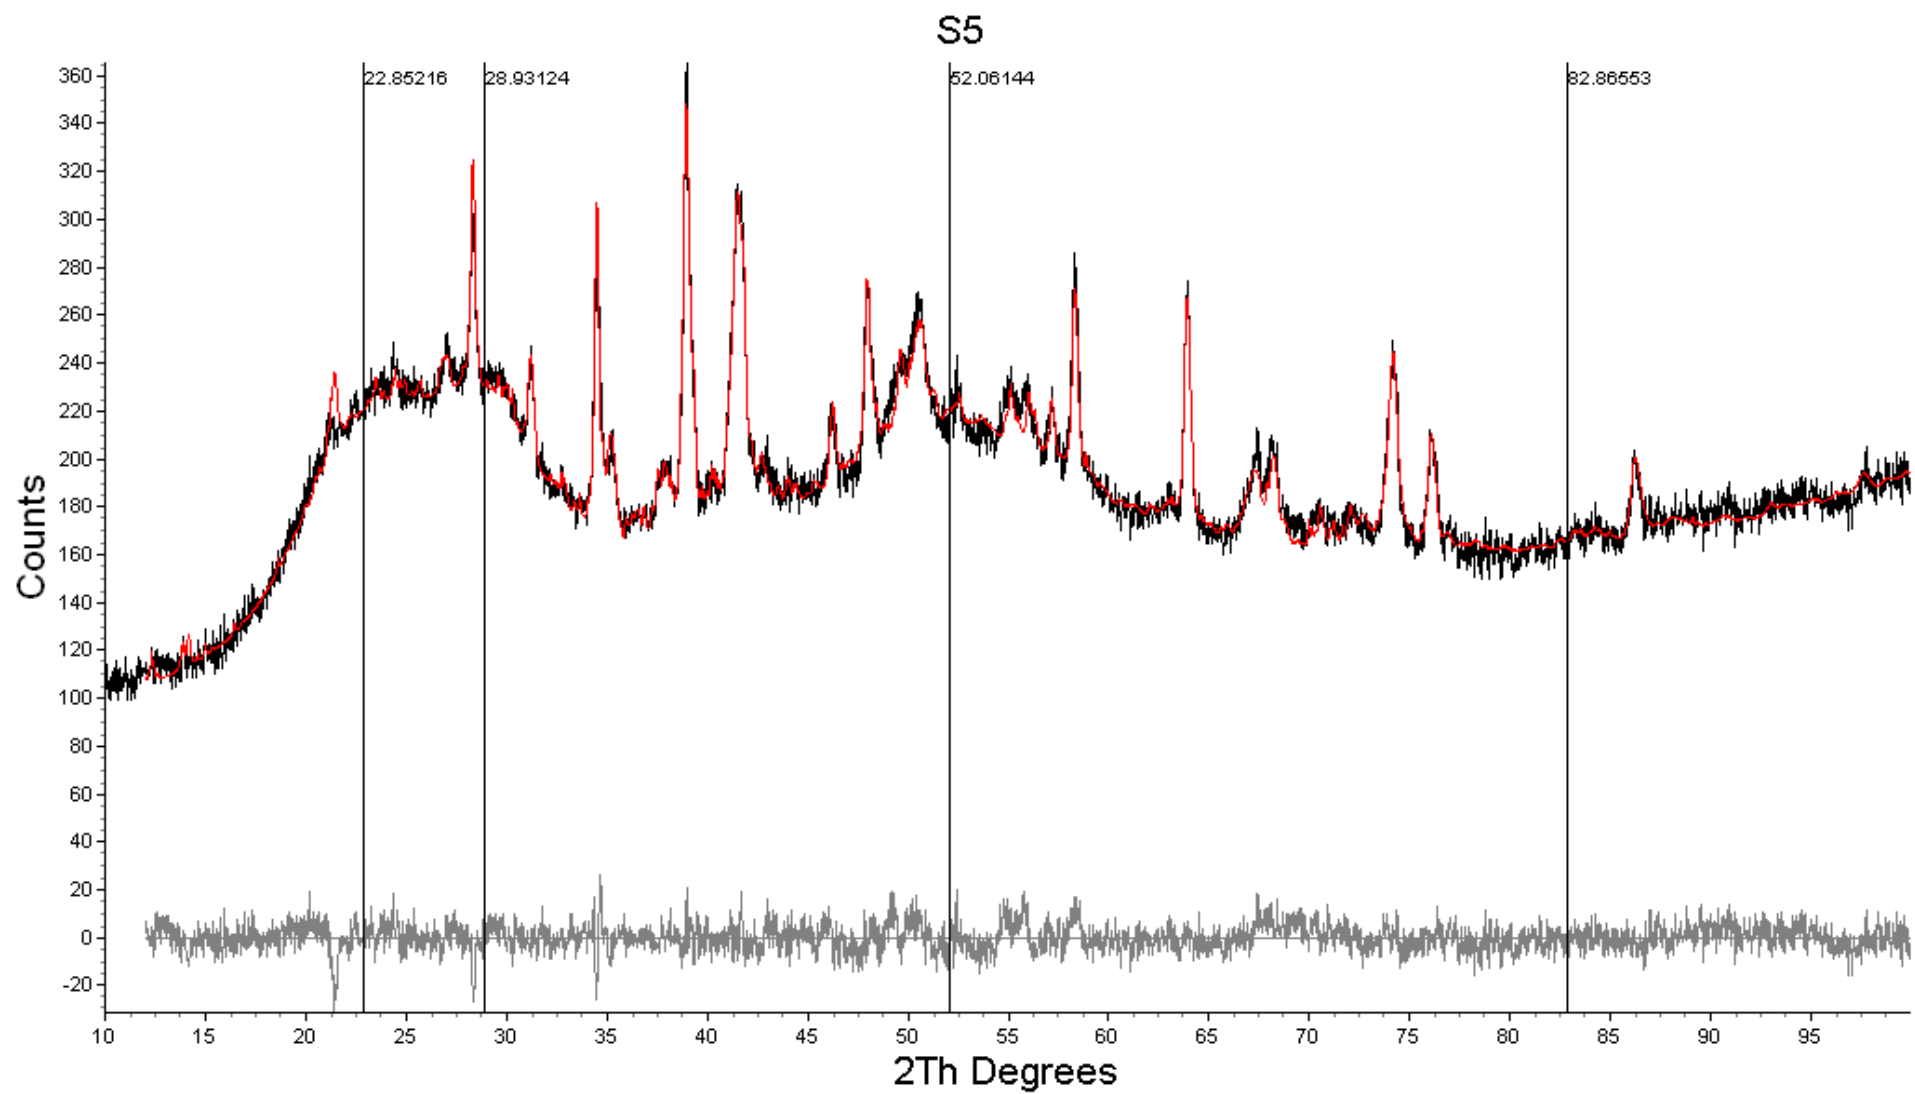

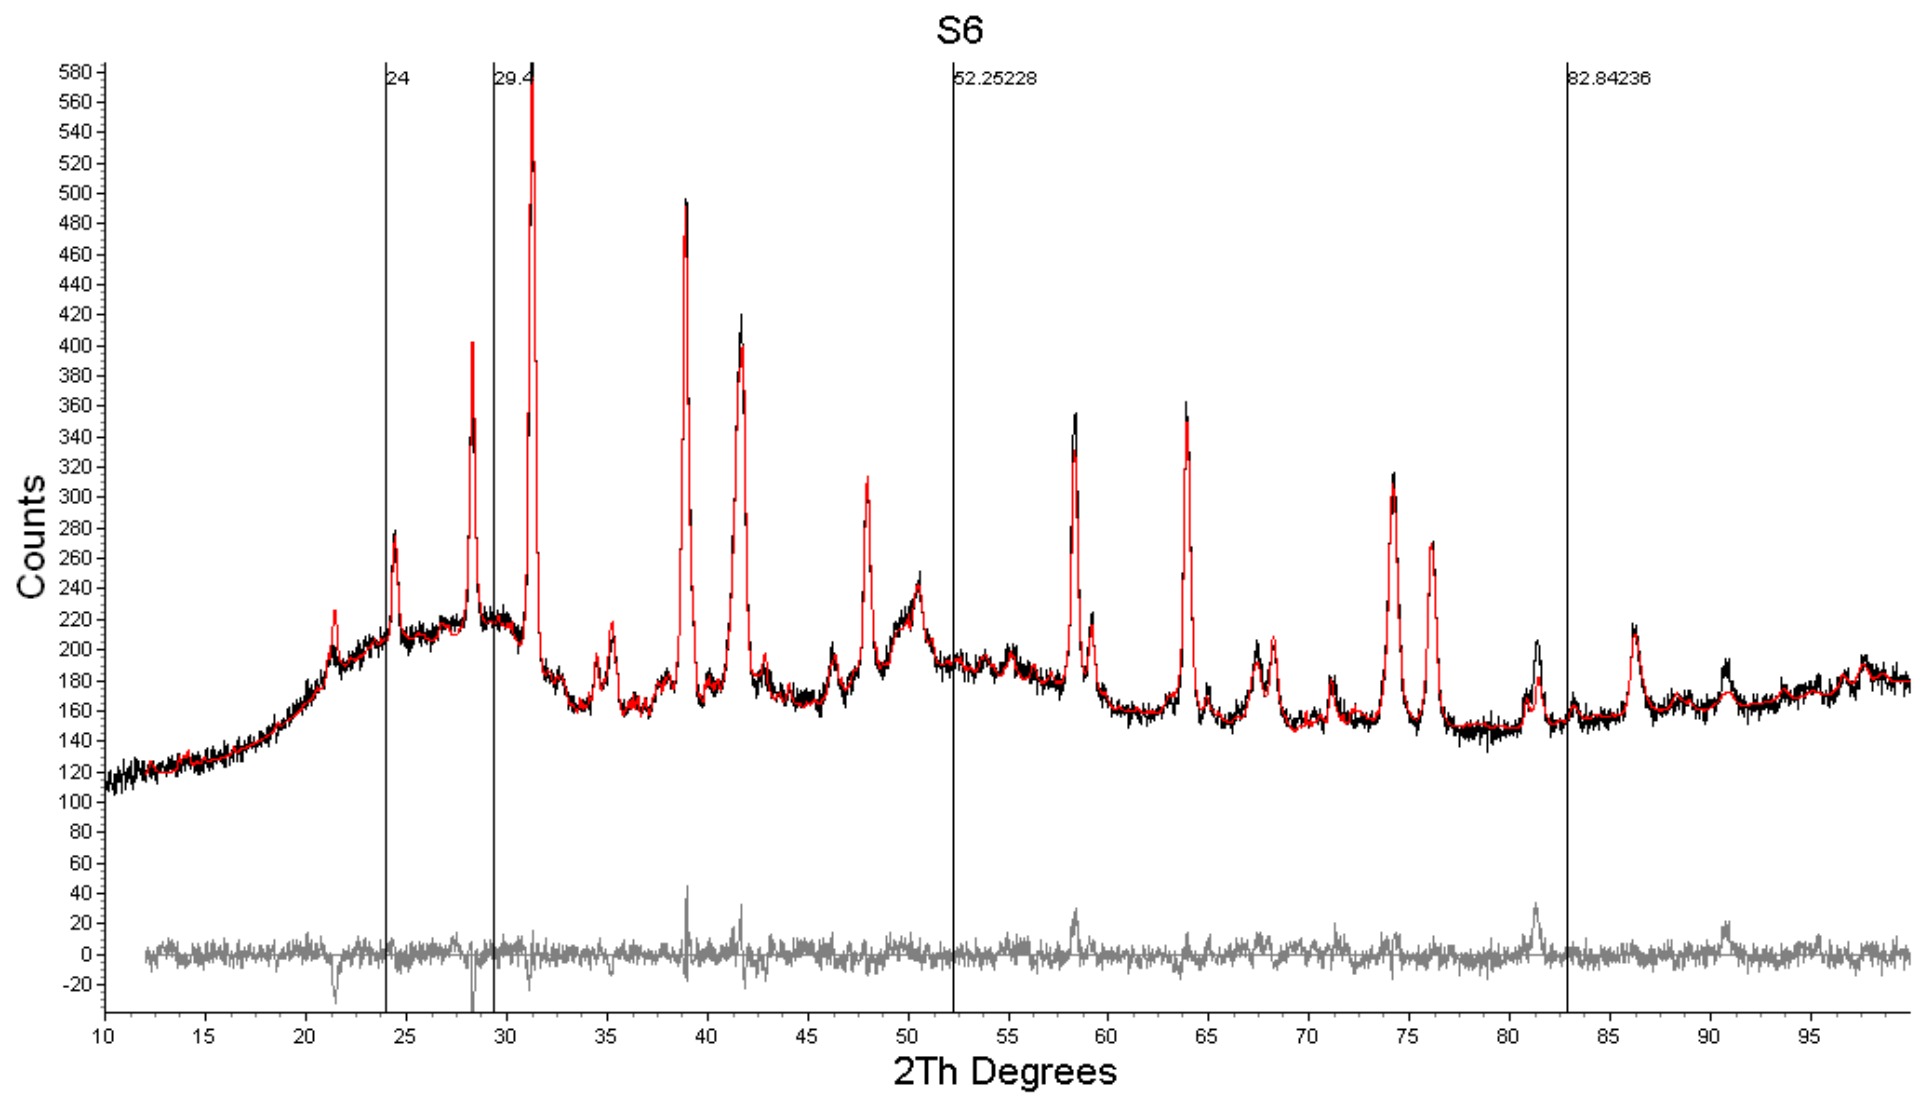

S7

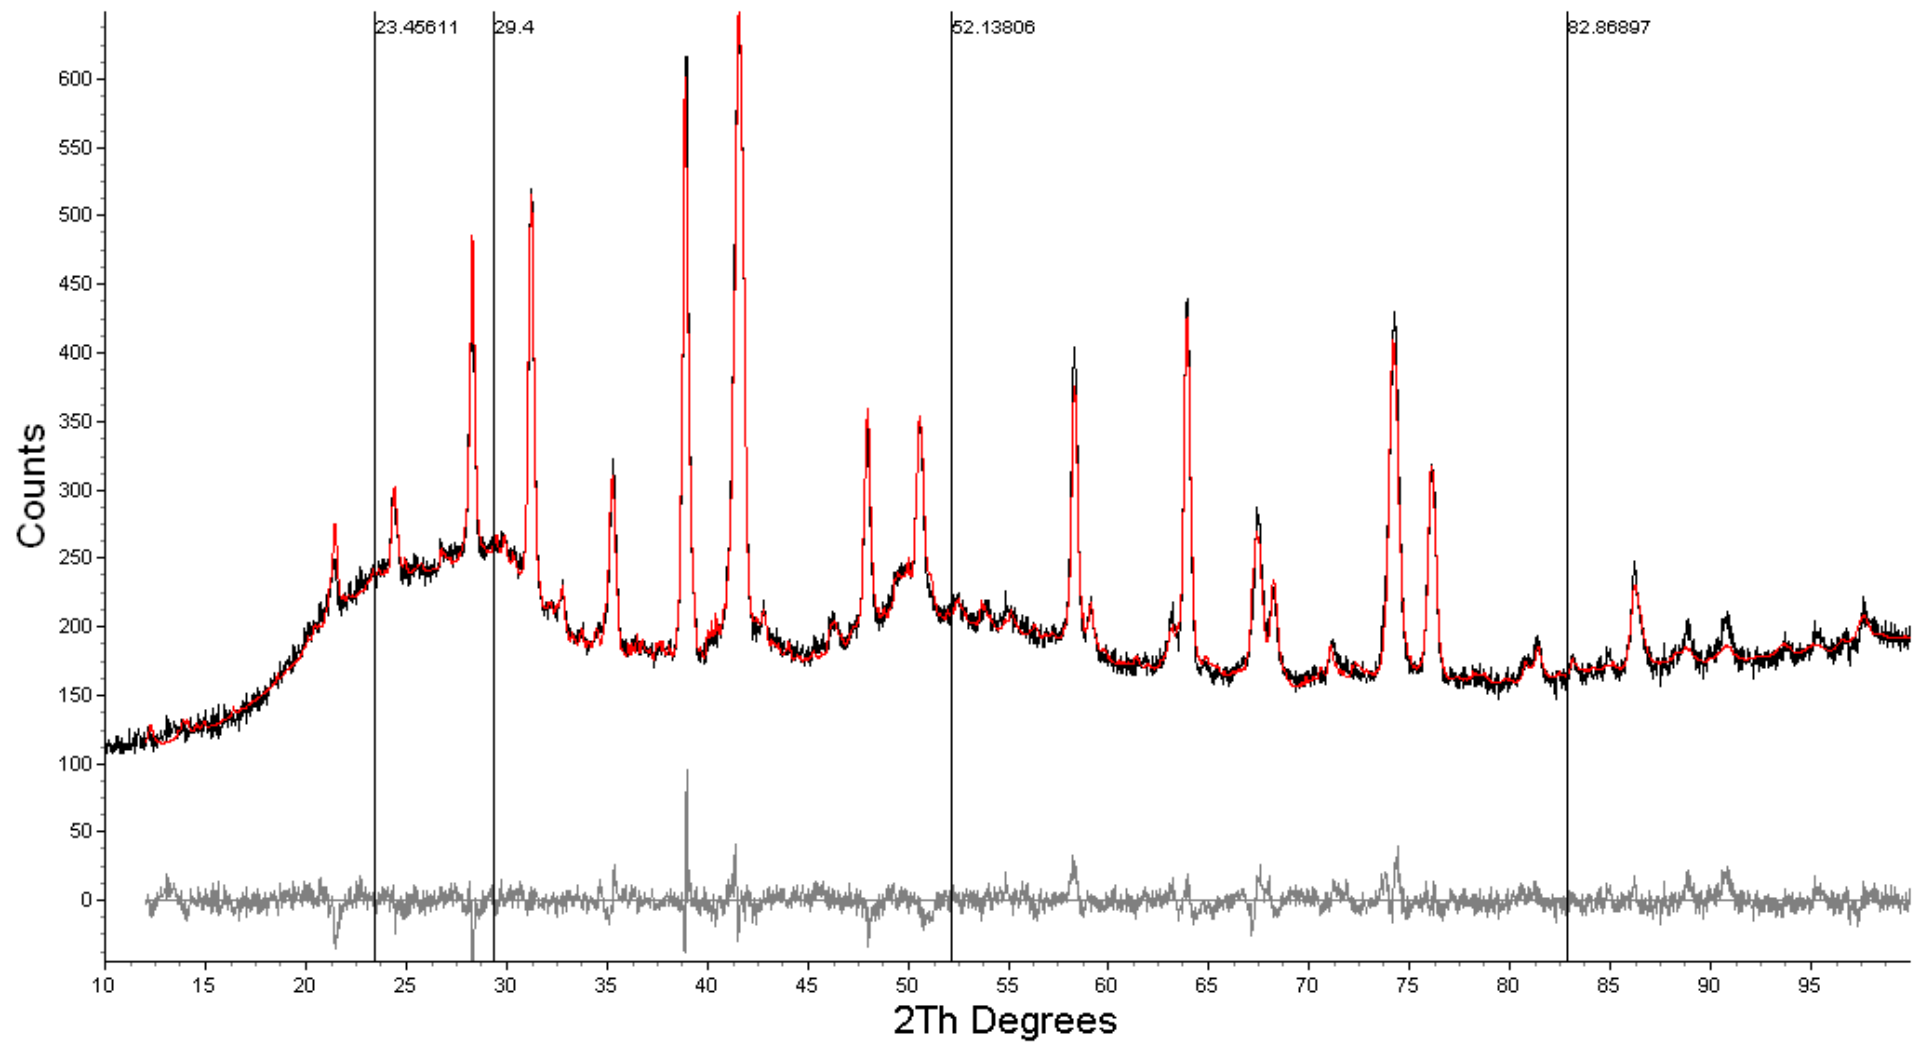

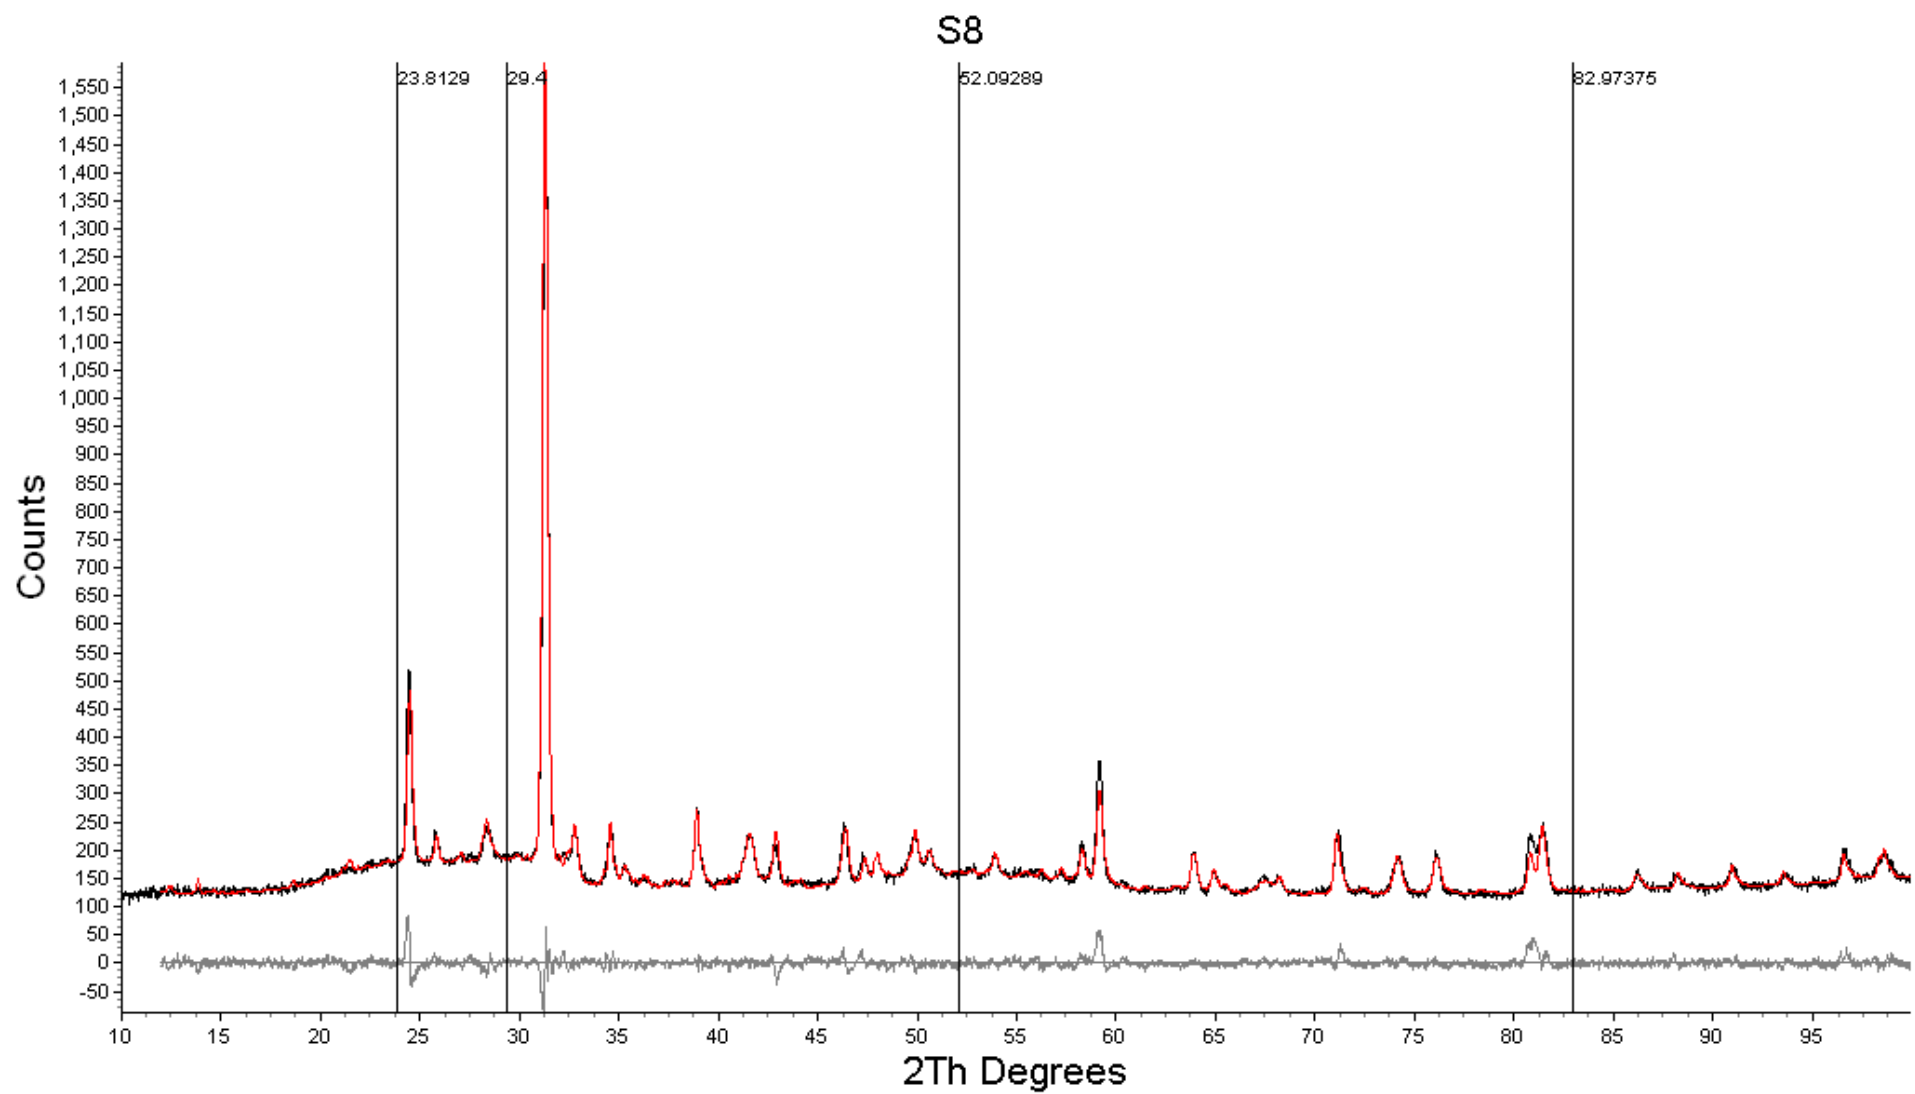

S9

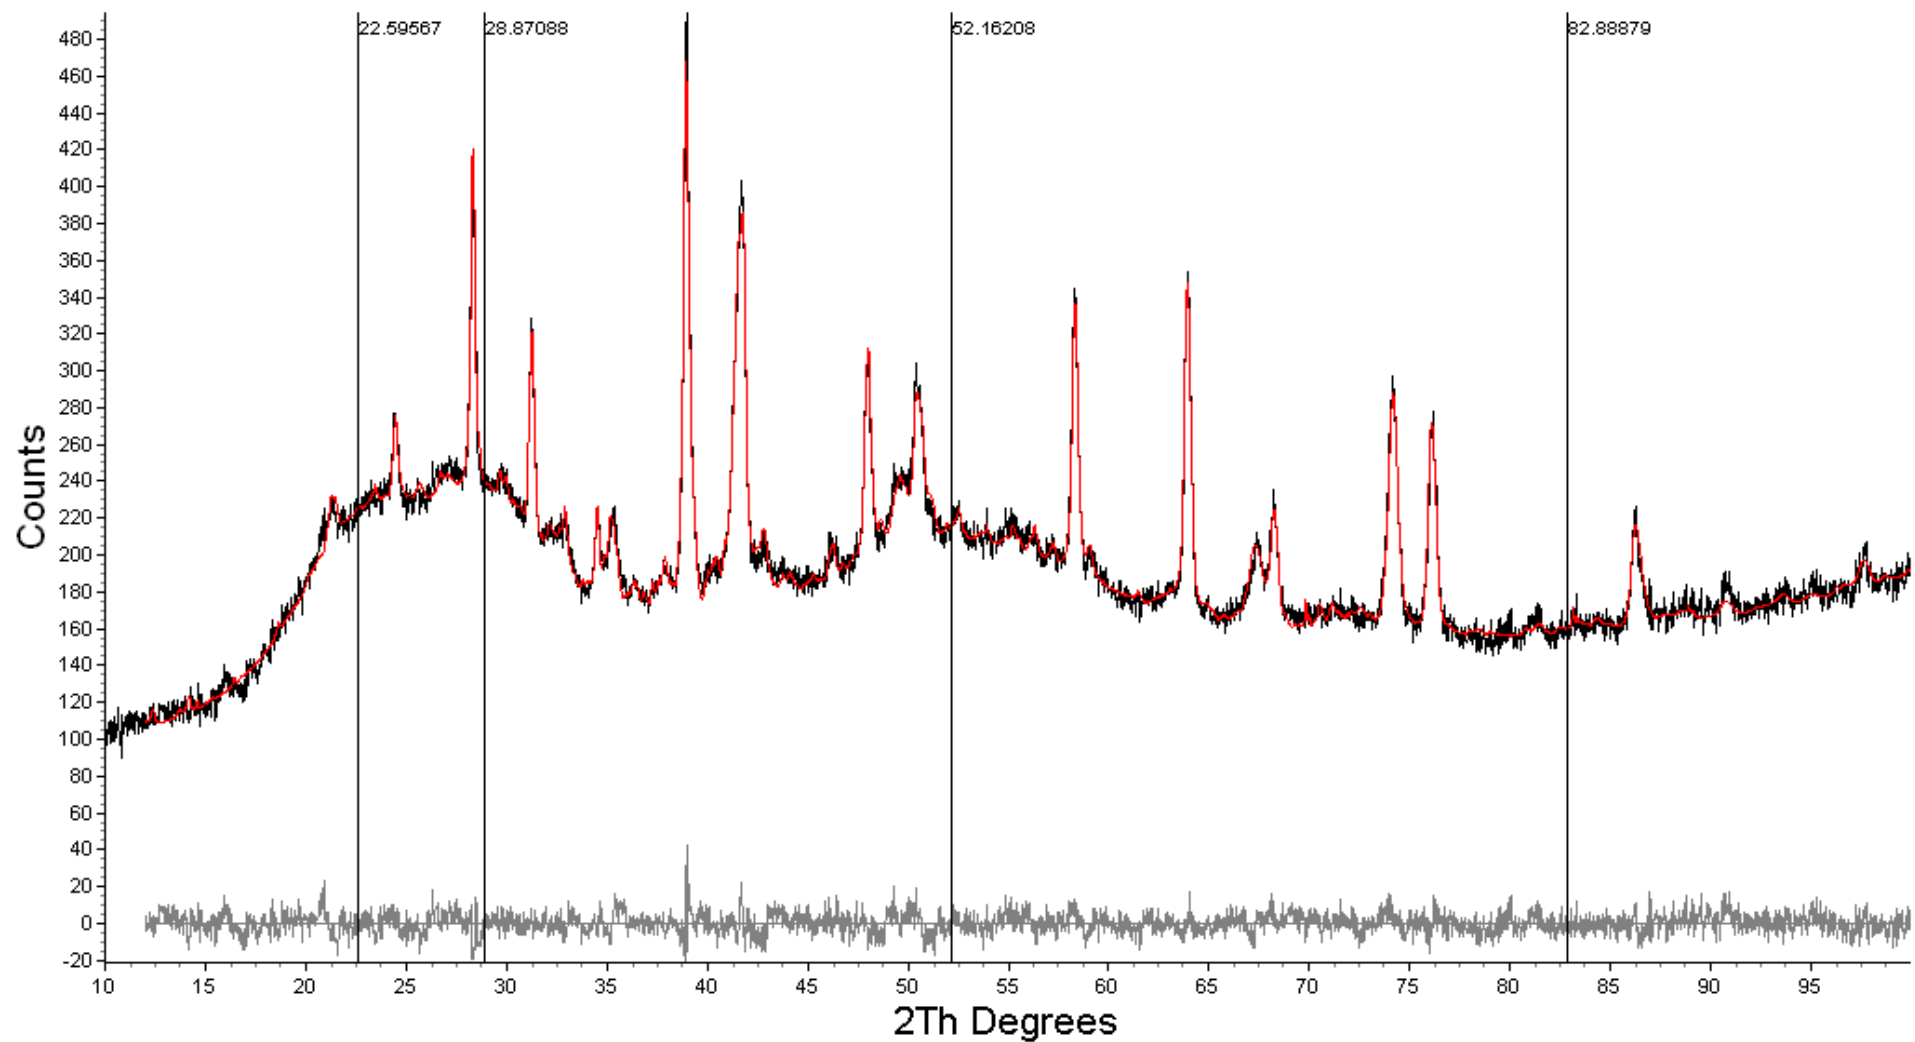



S10

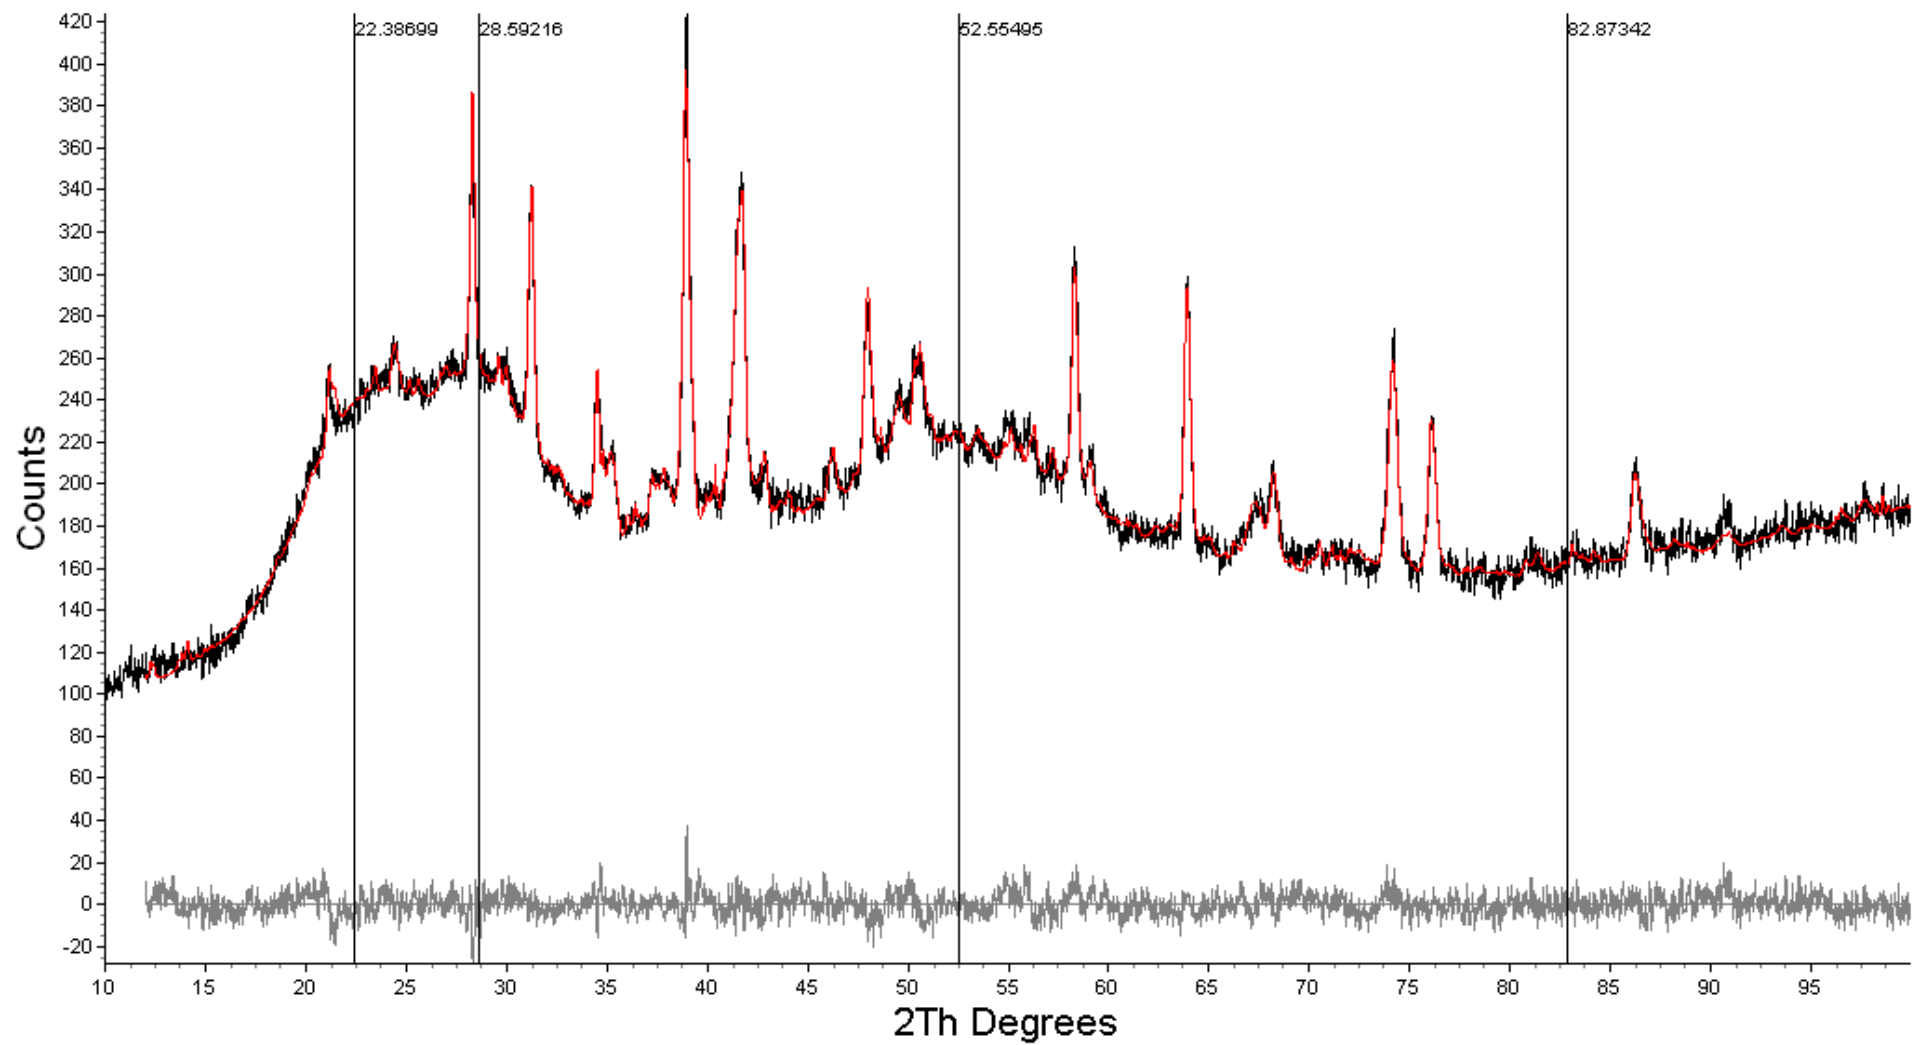

S11

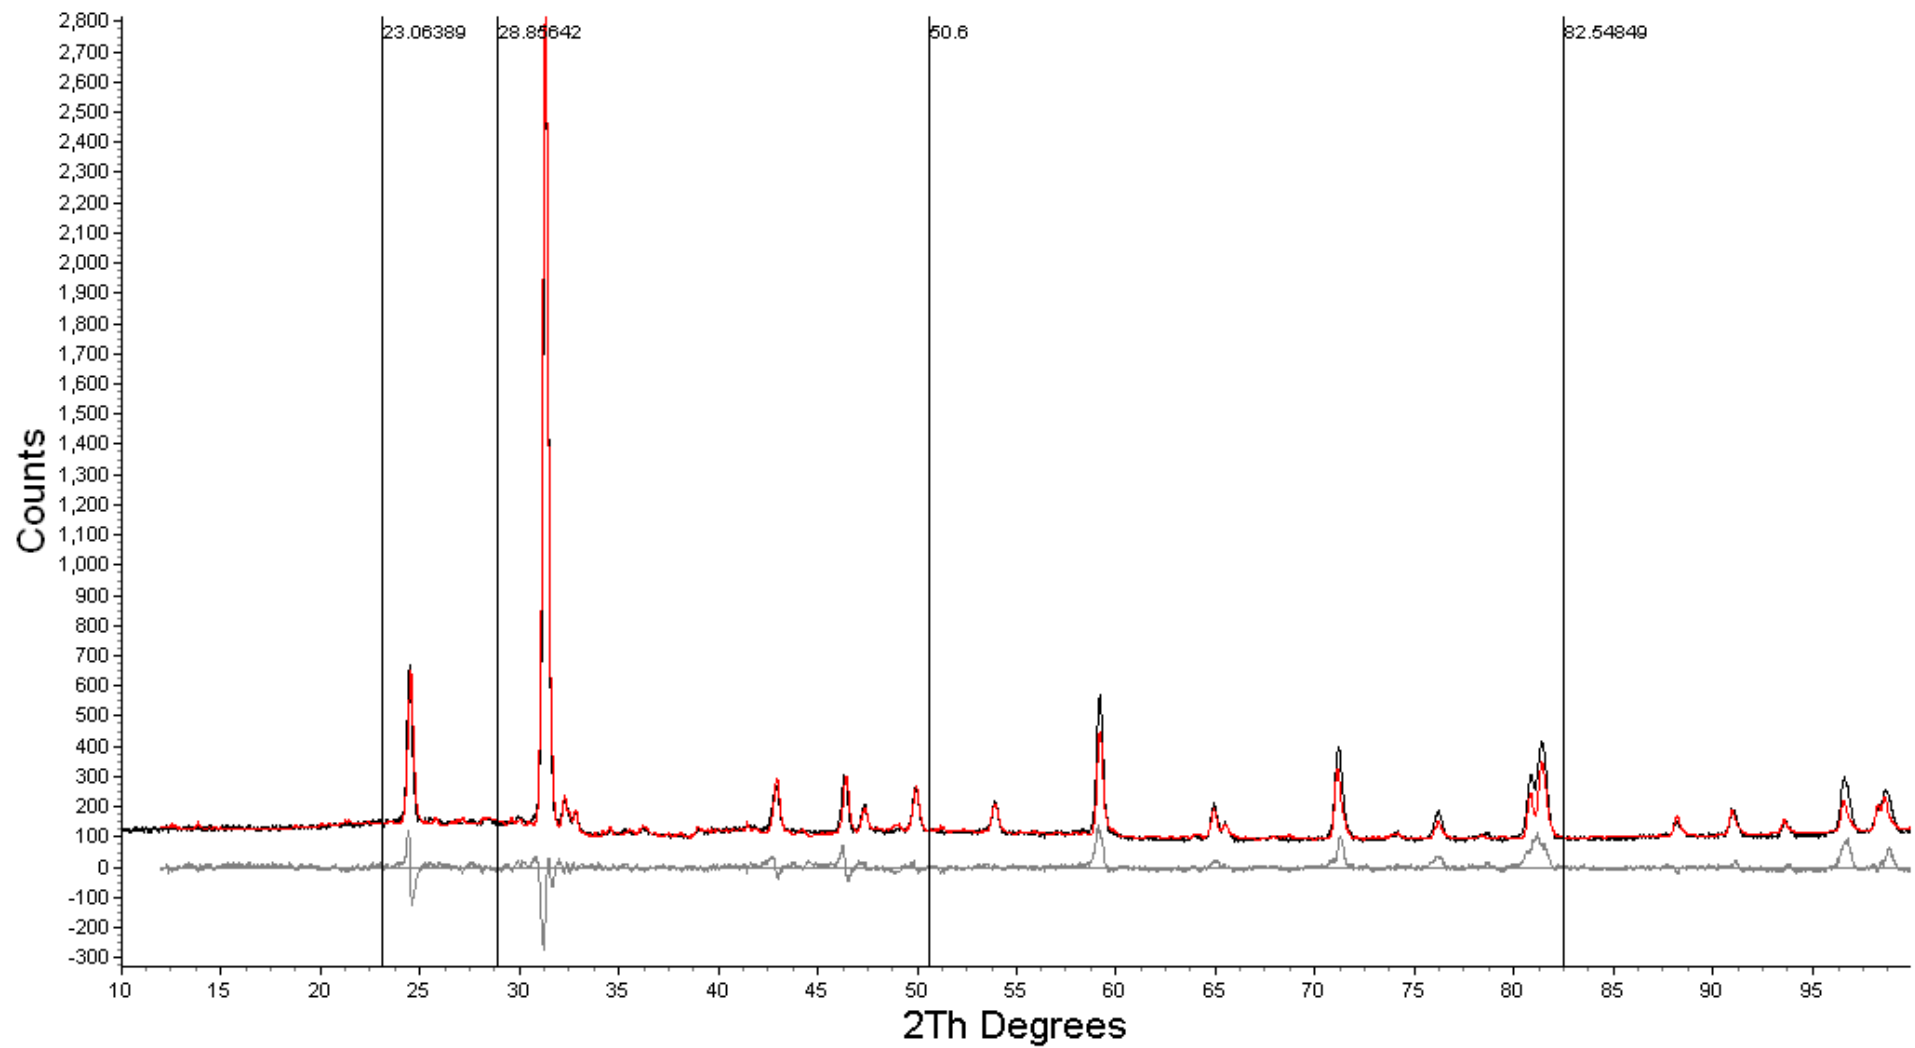

S12

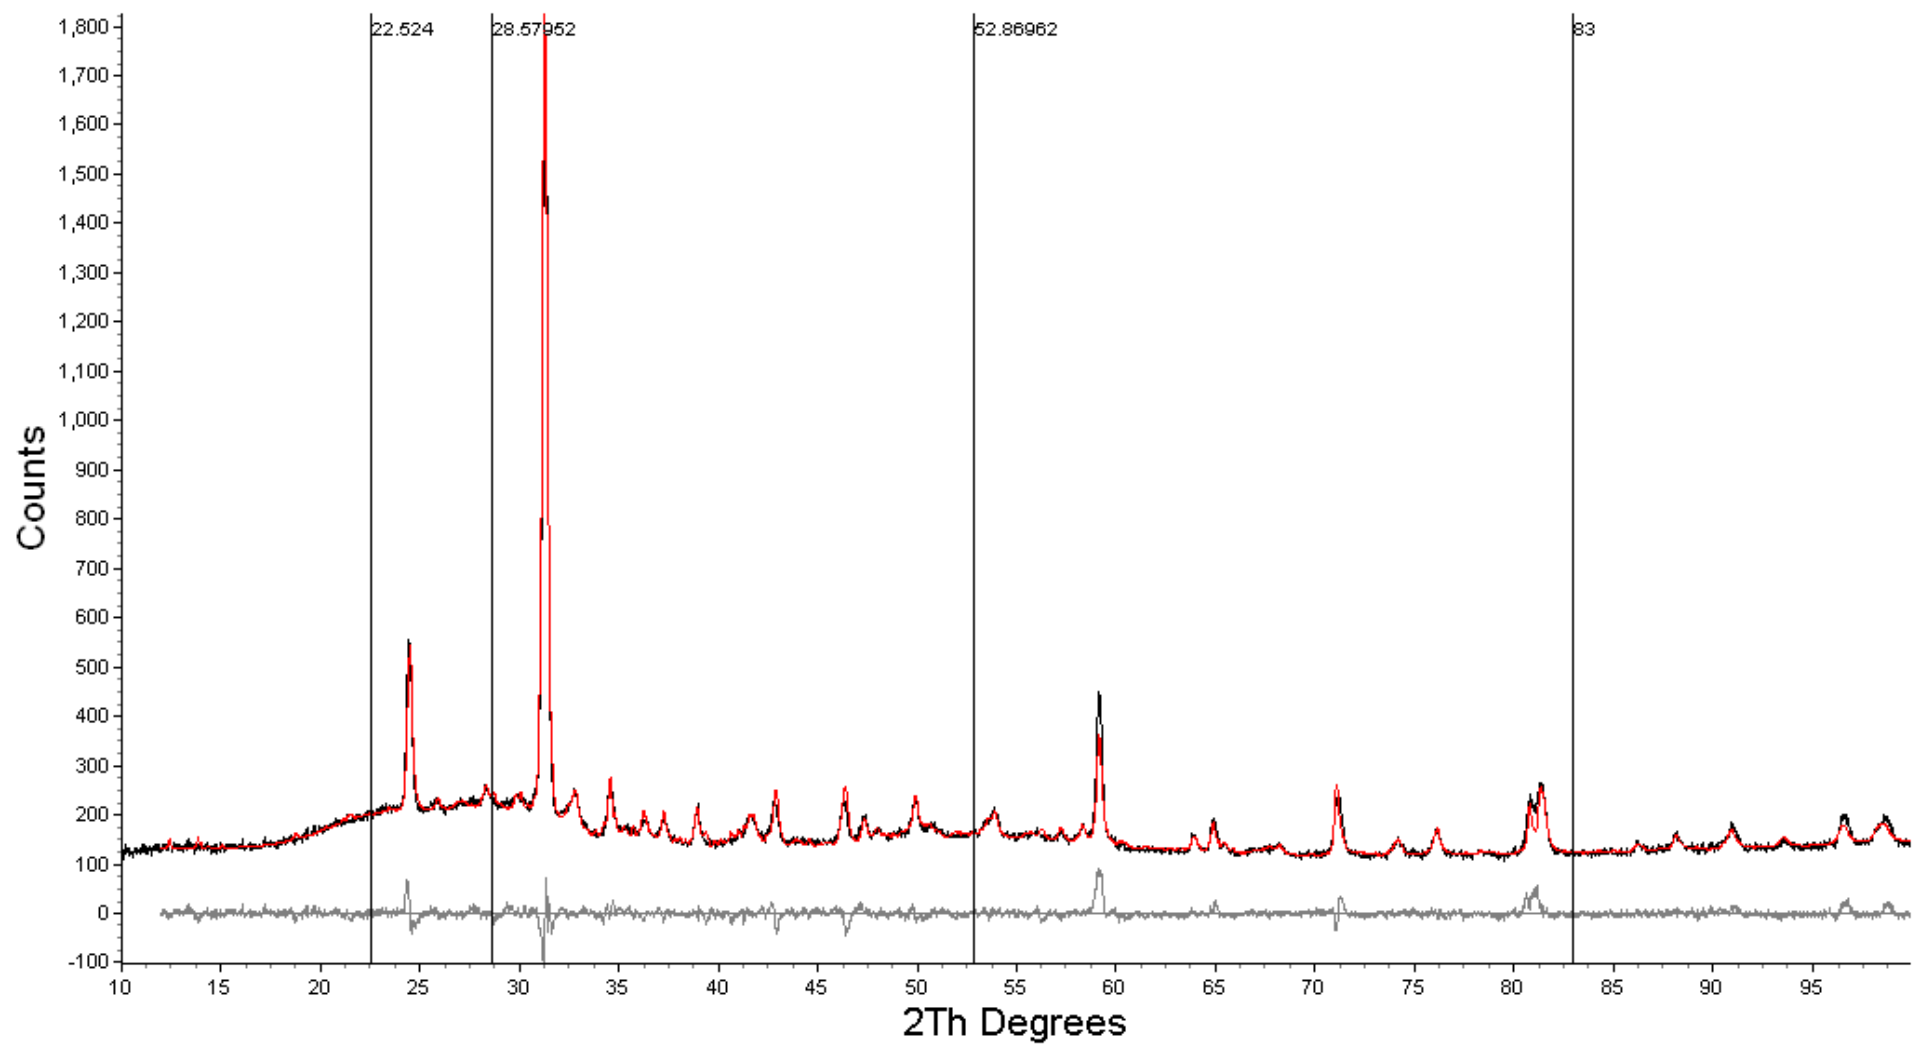

S13

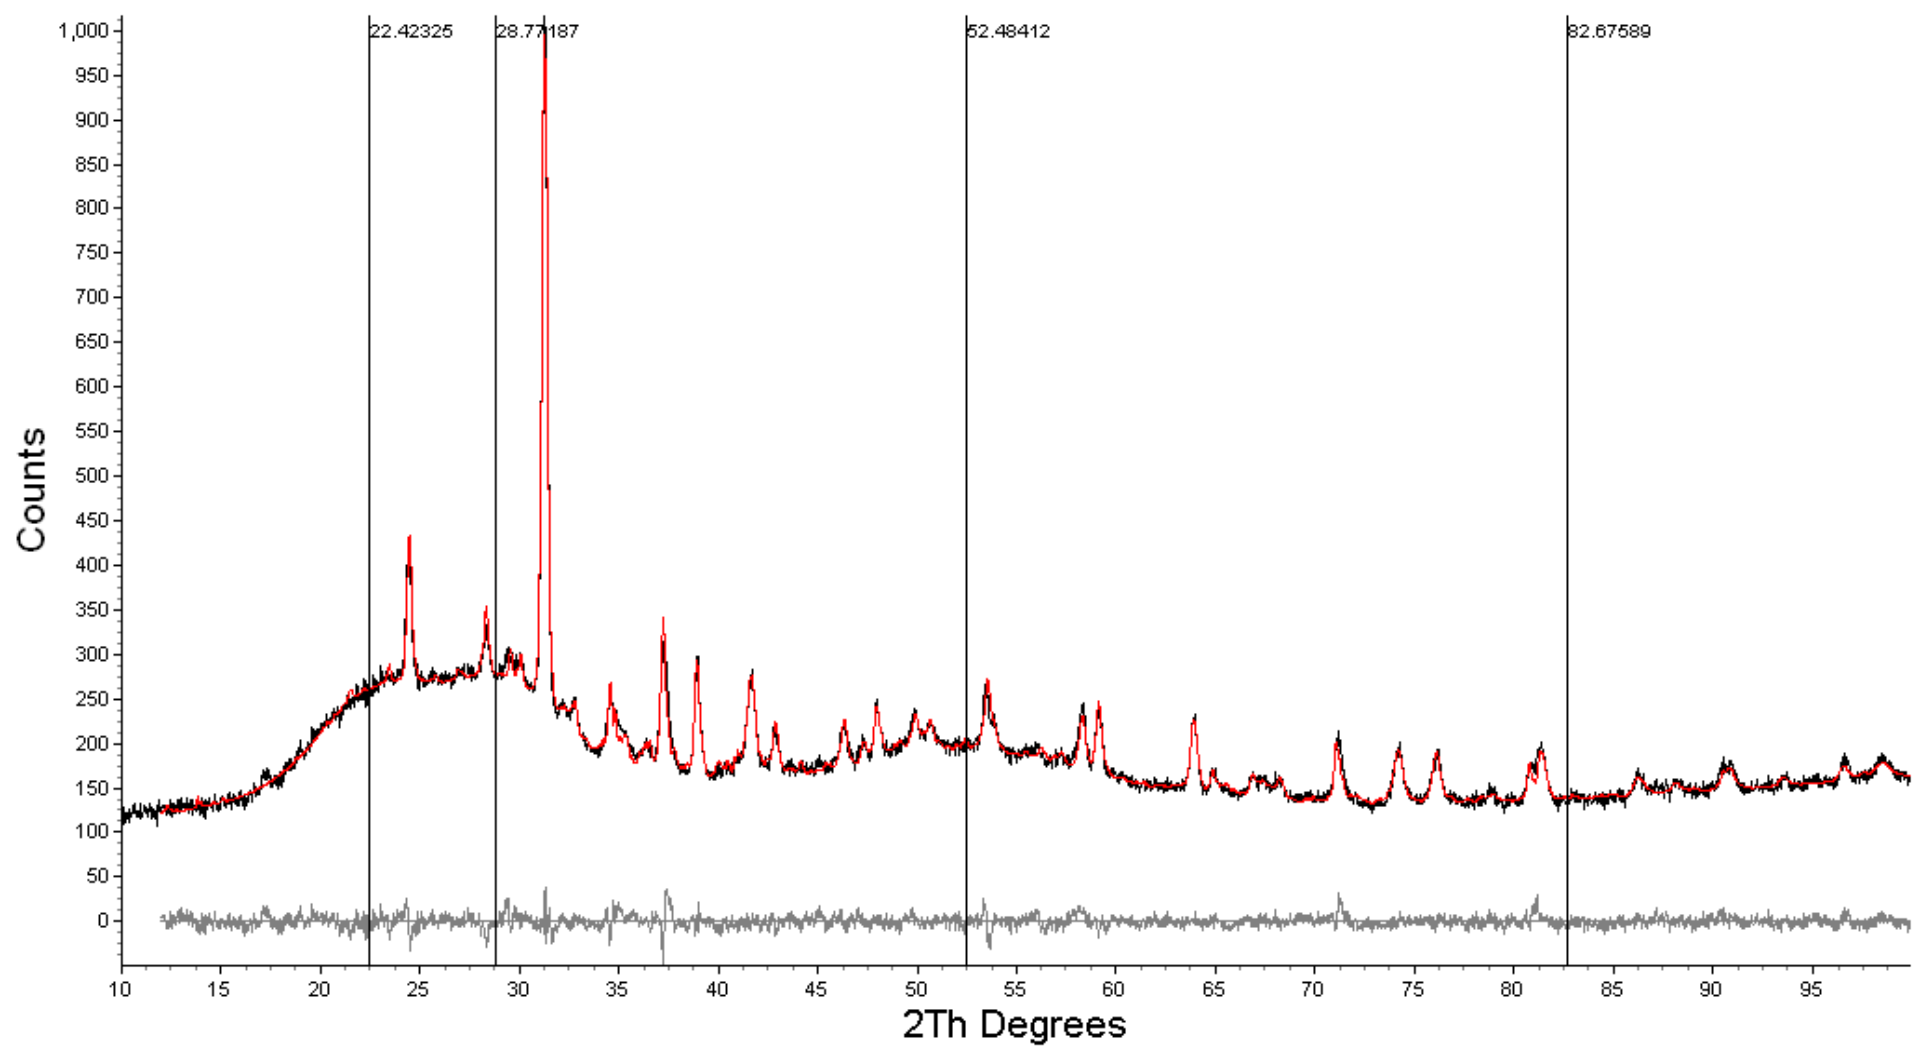

S14

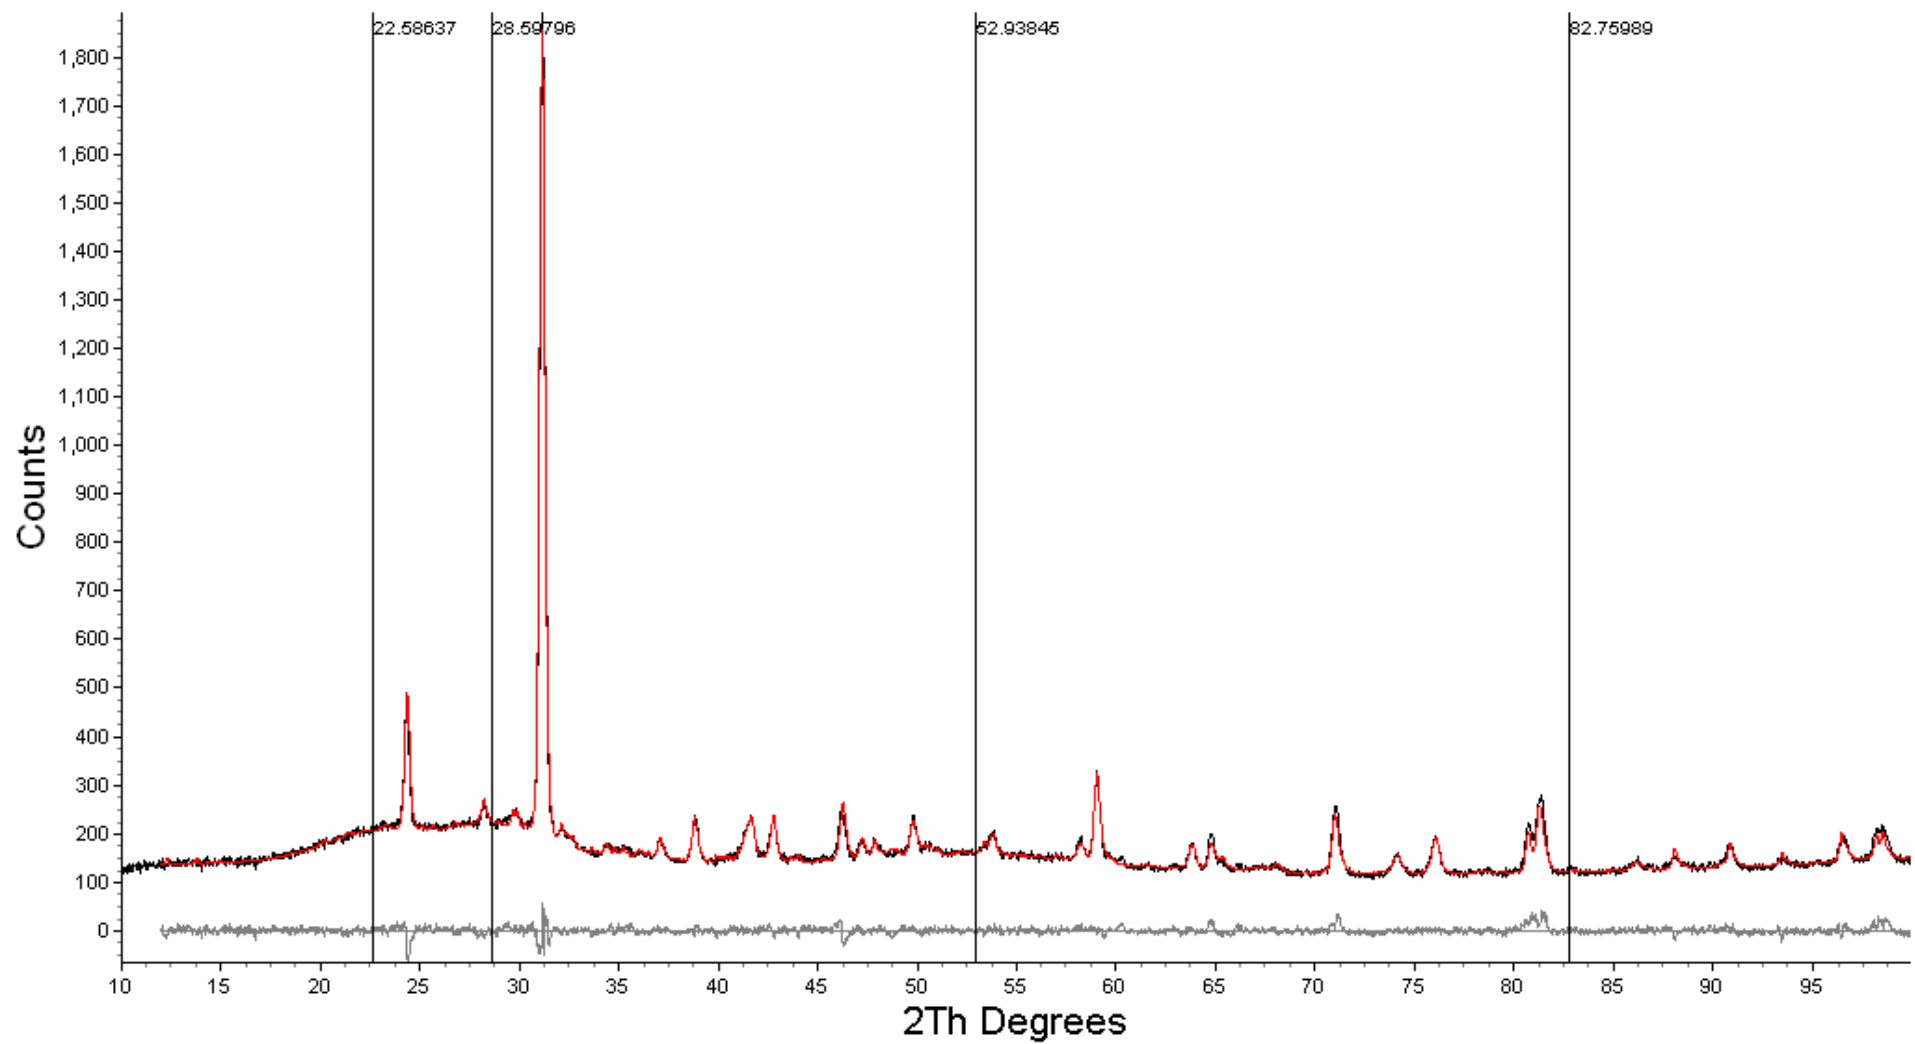

S15

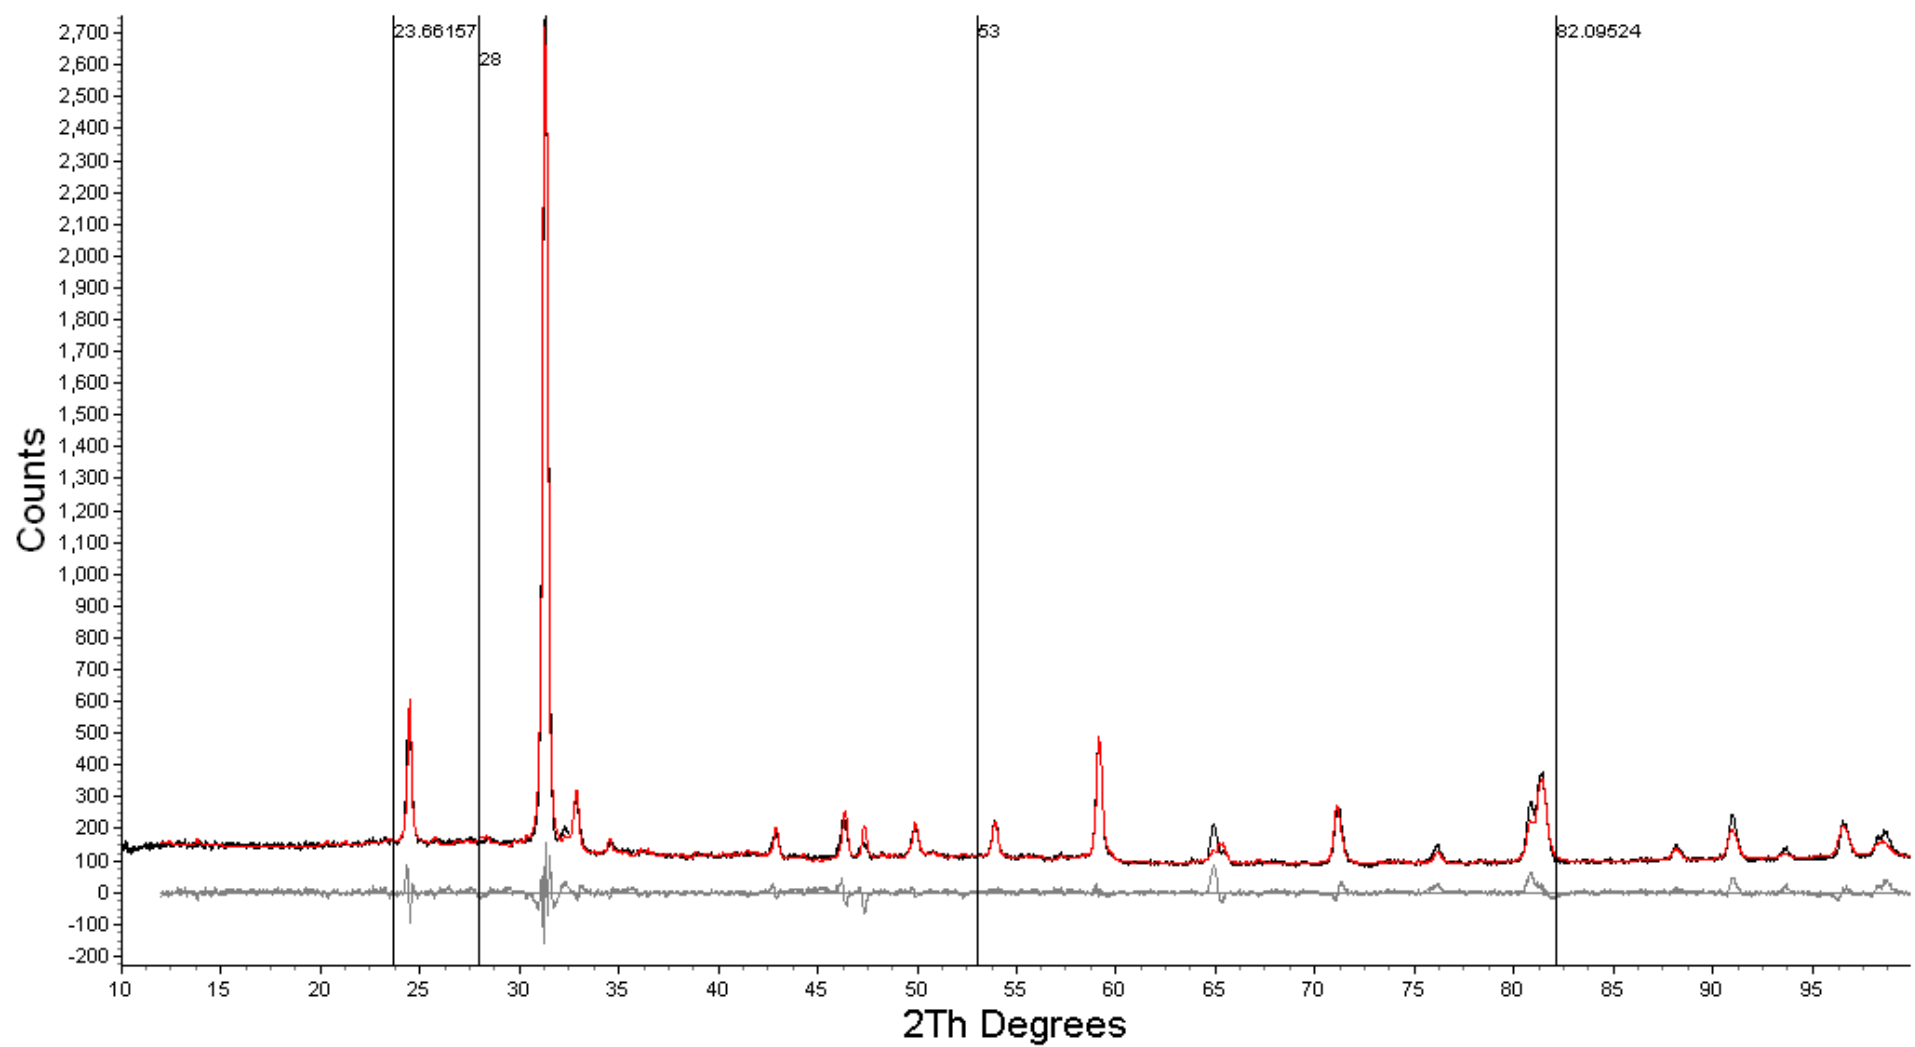

S17

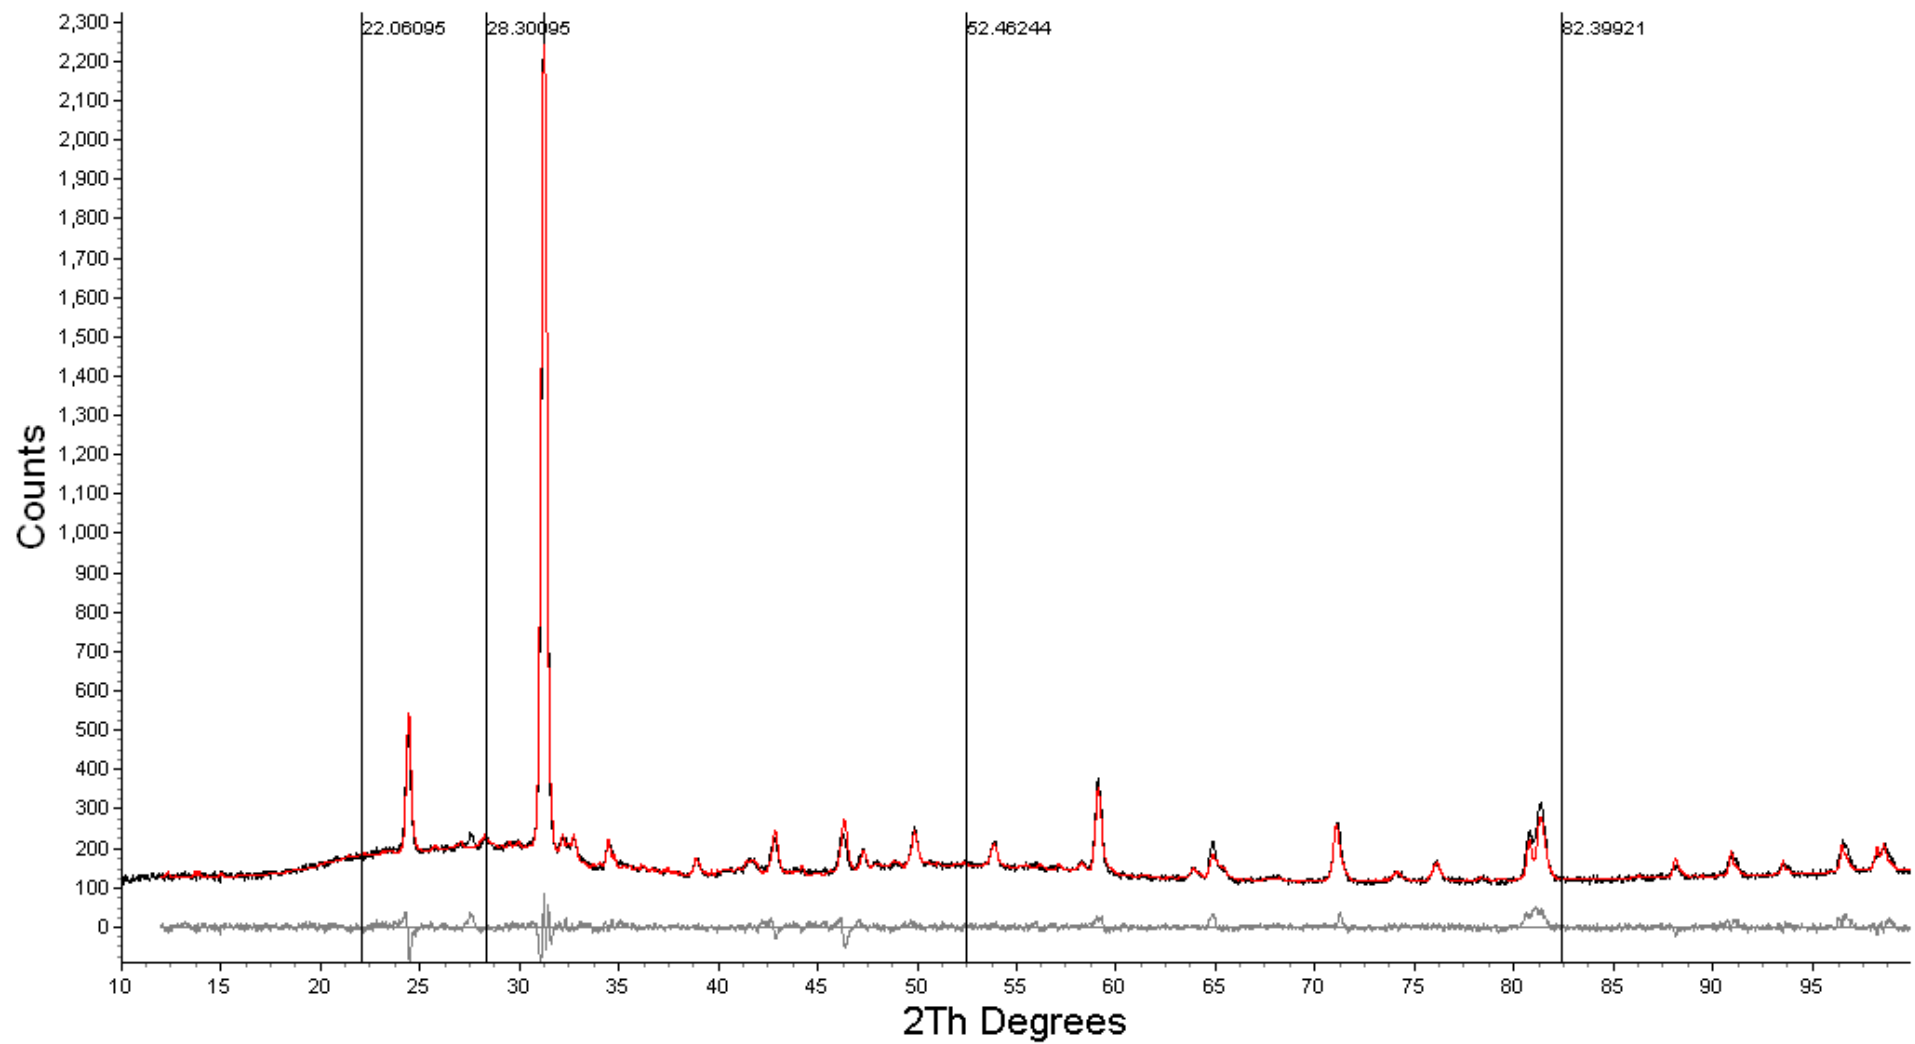

S18

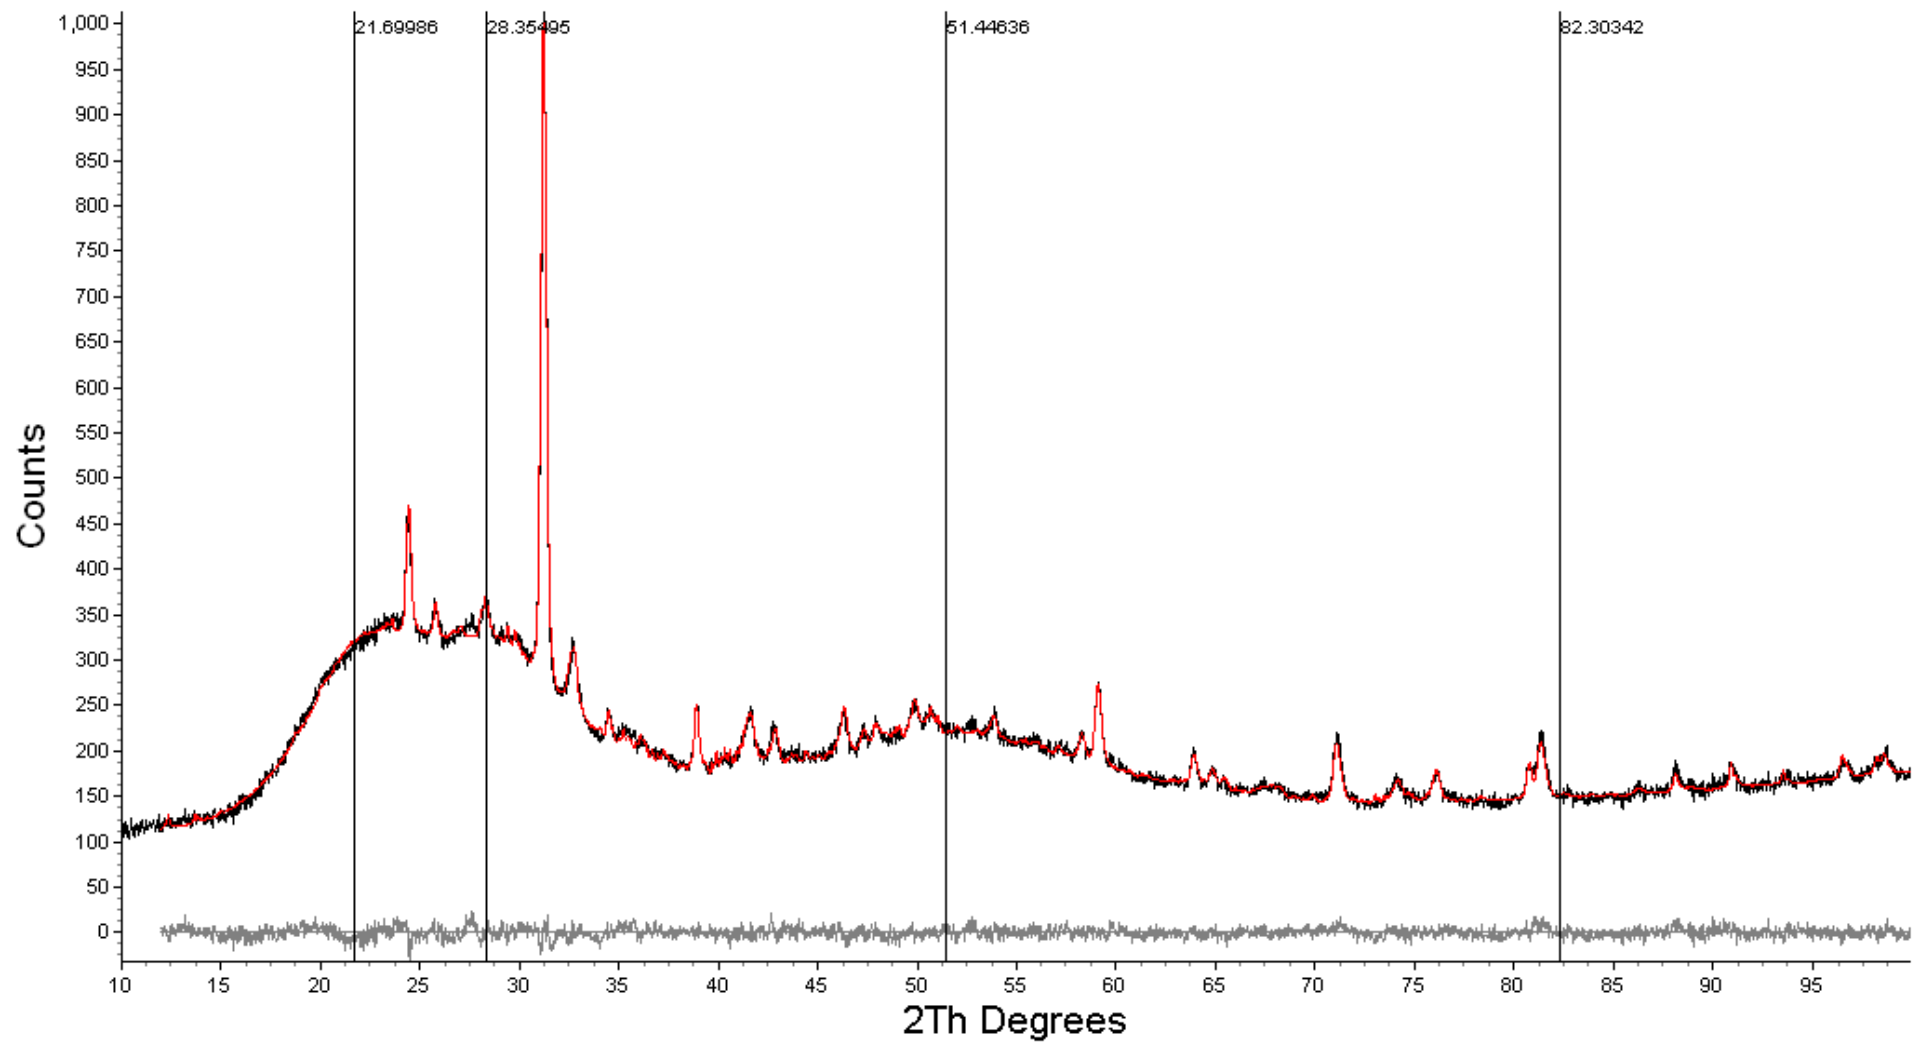



S21

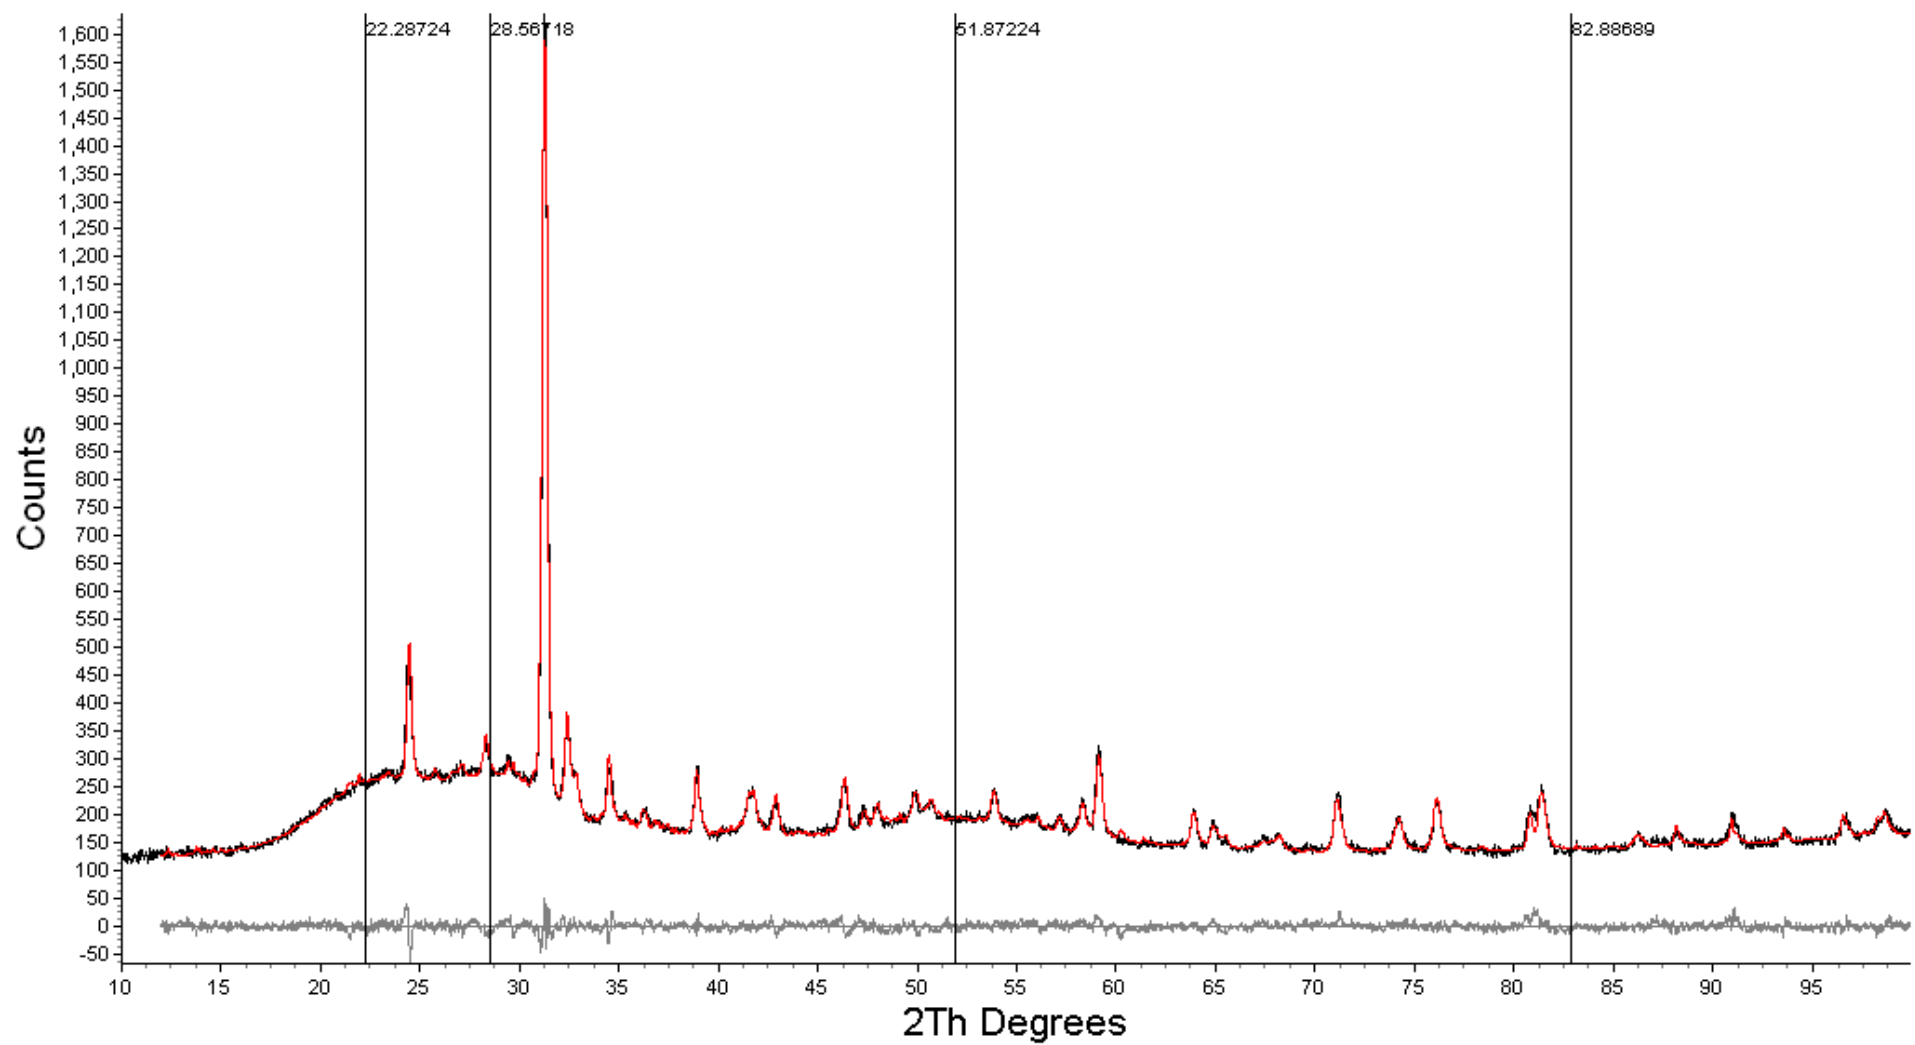

S22

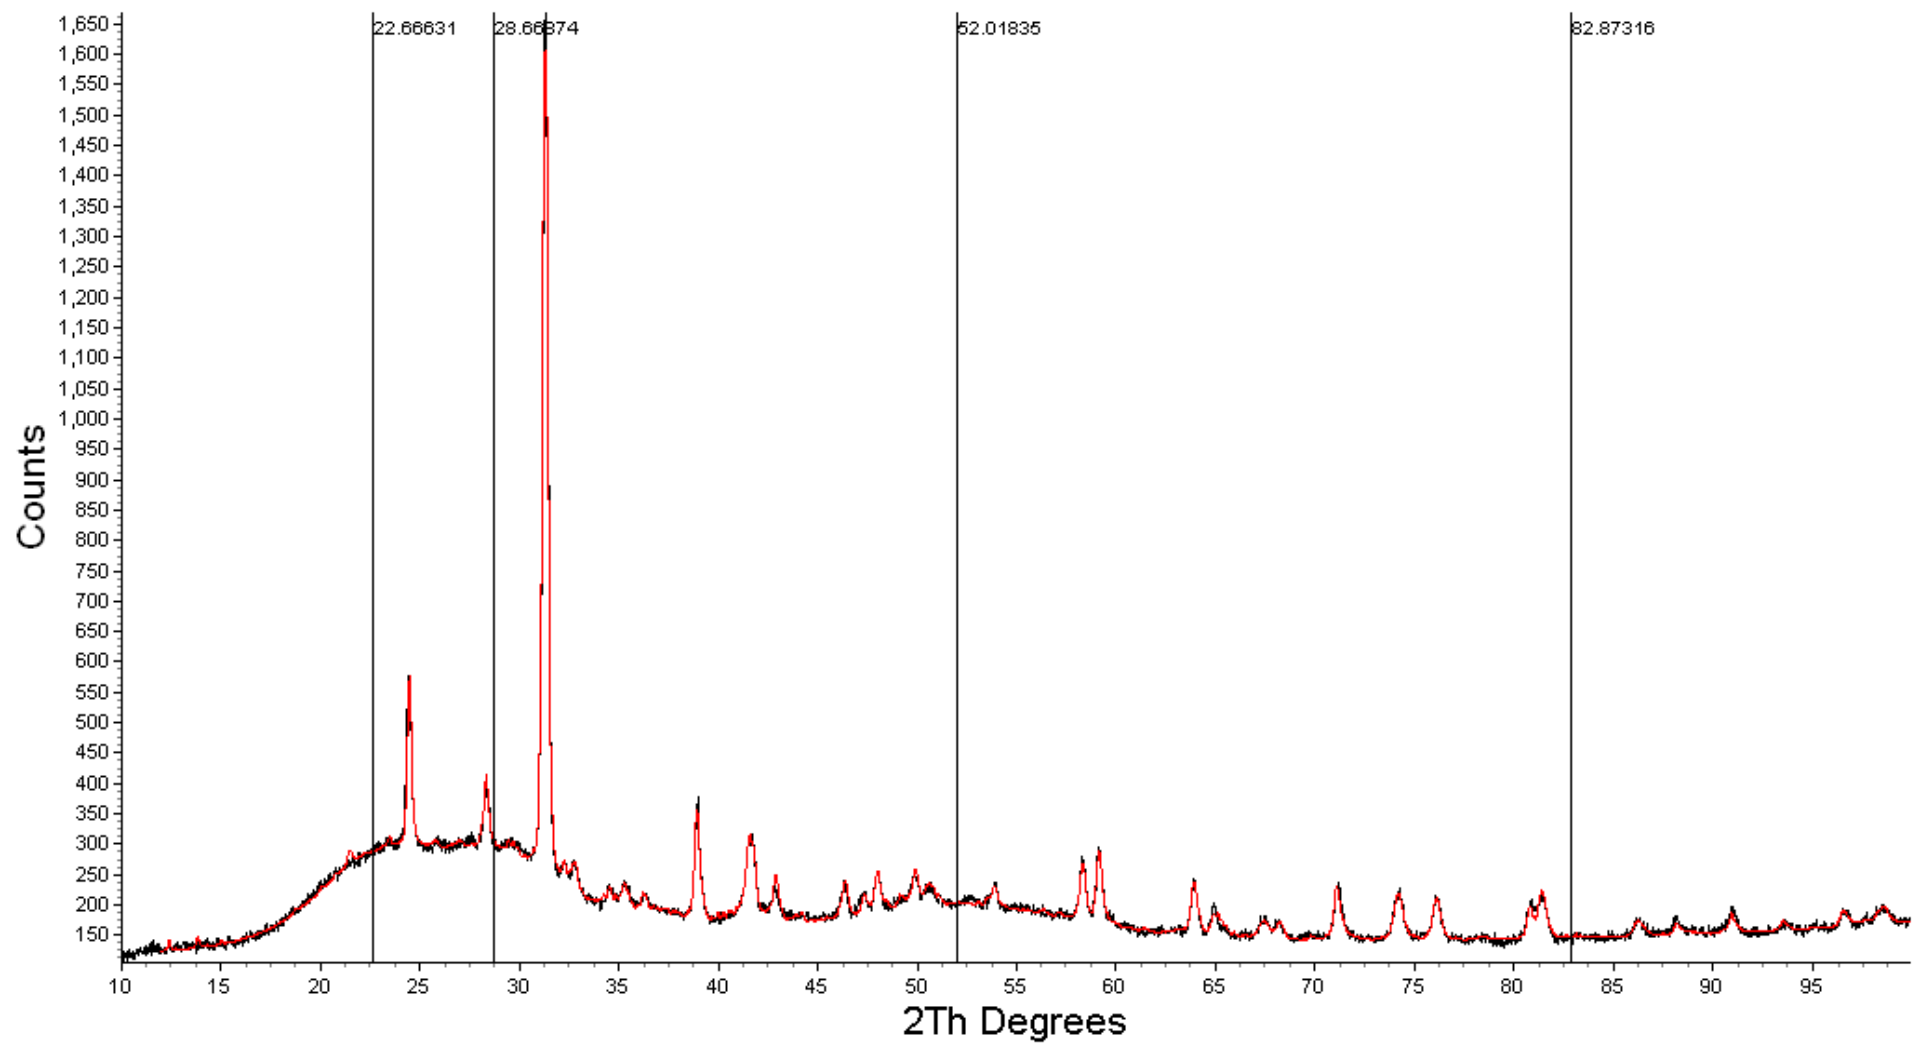

S23

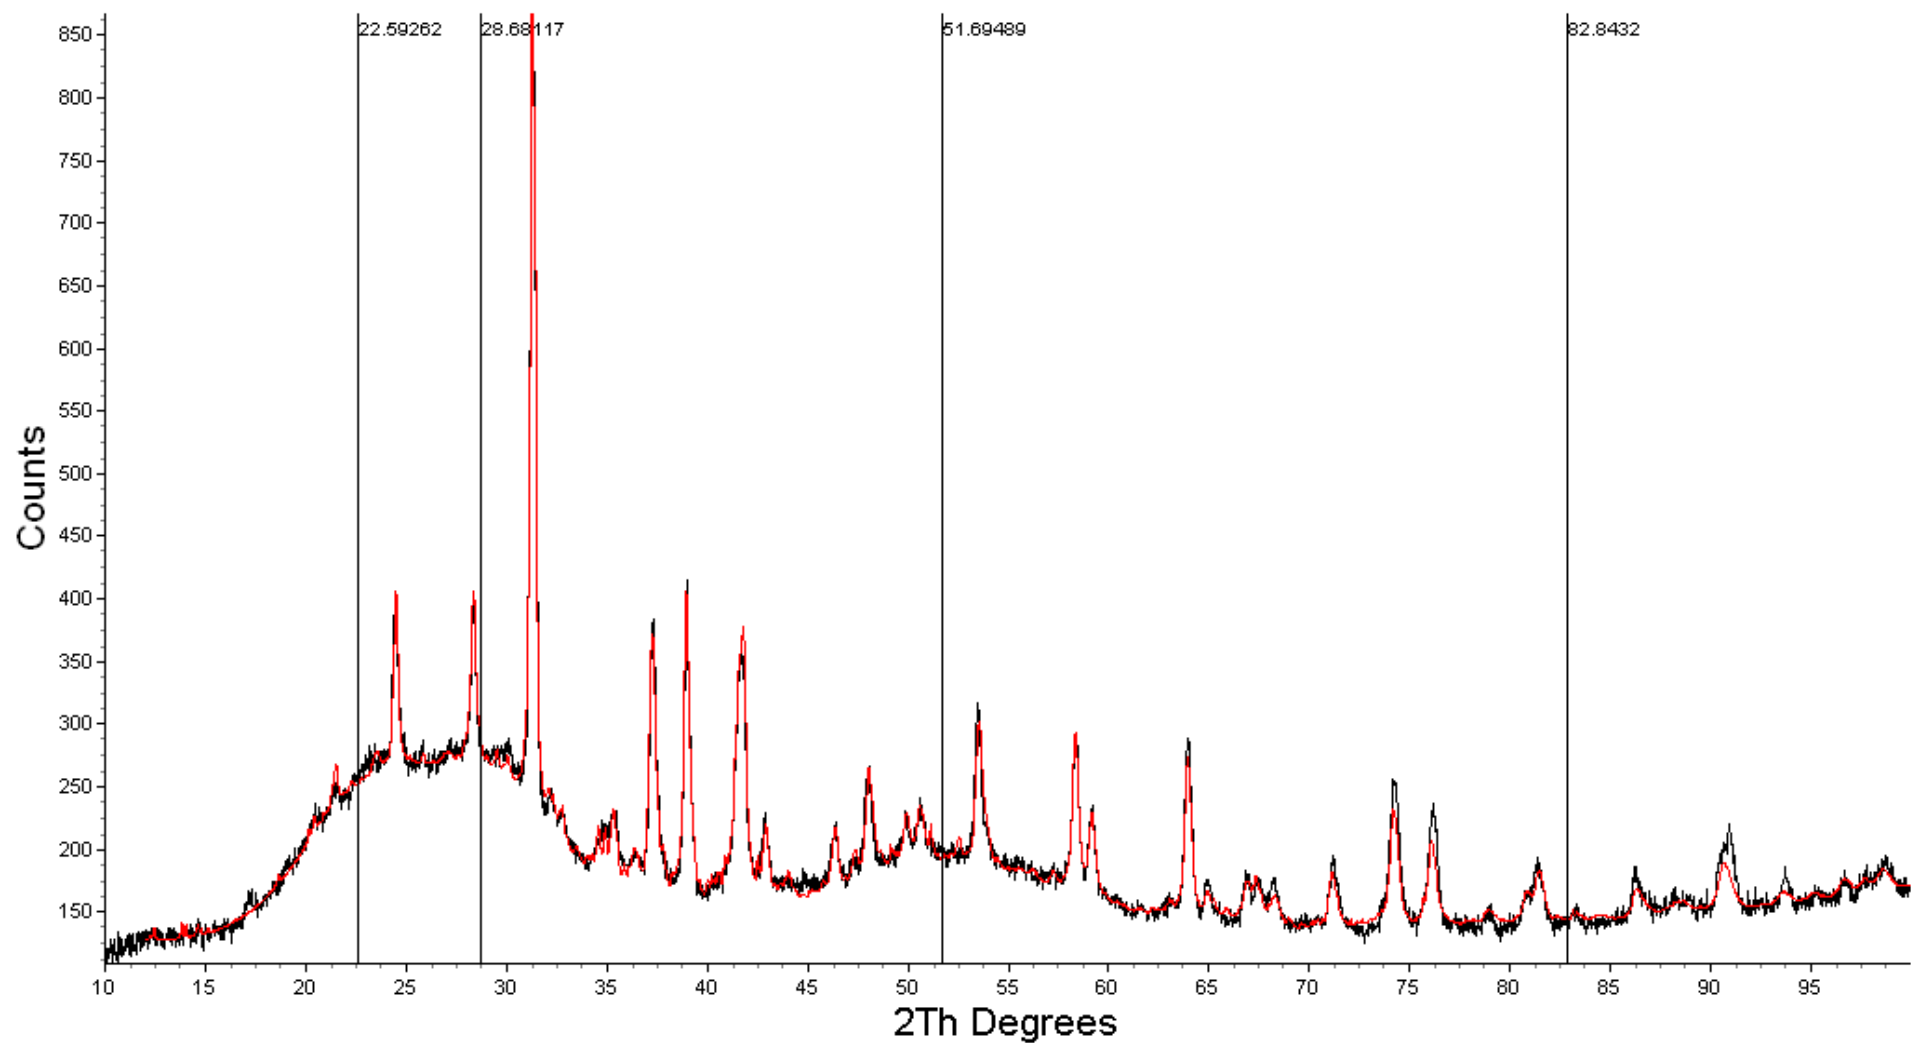

S24

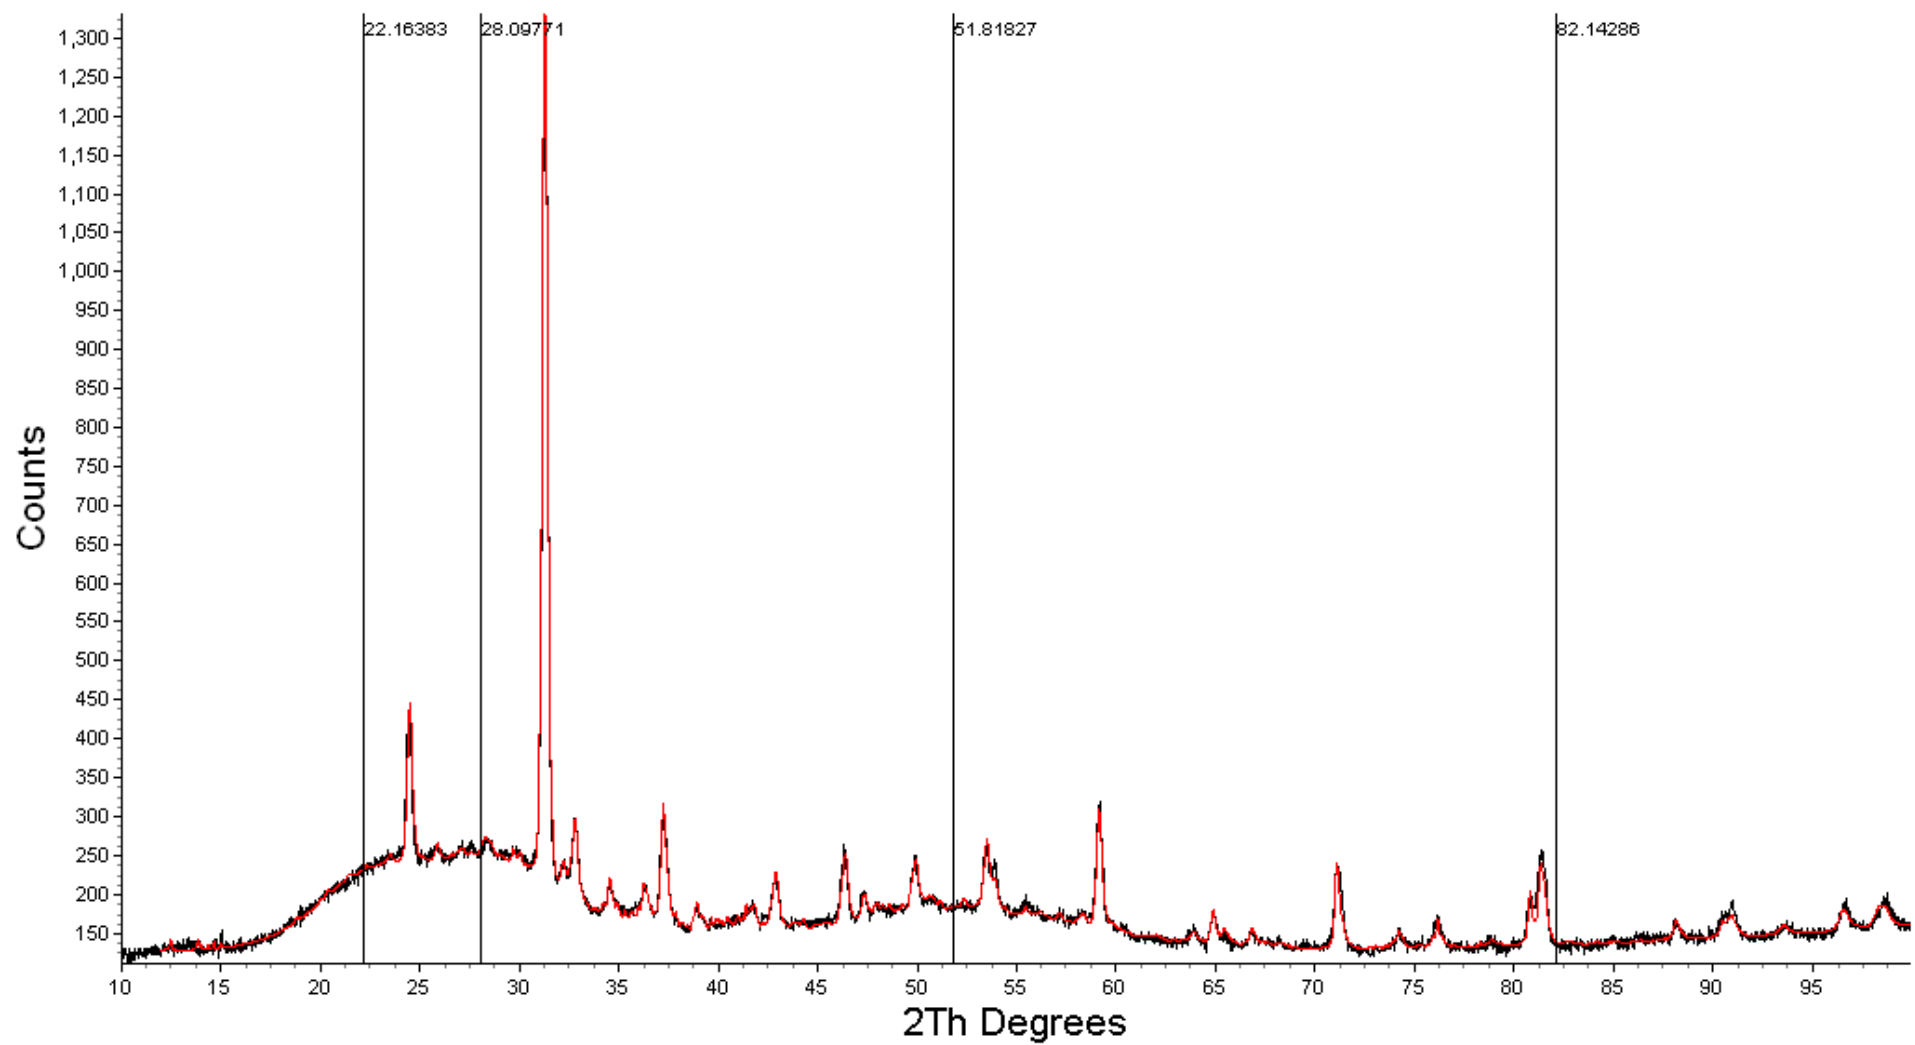

S25

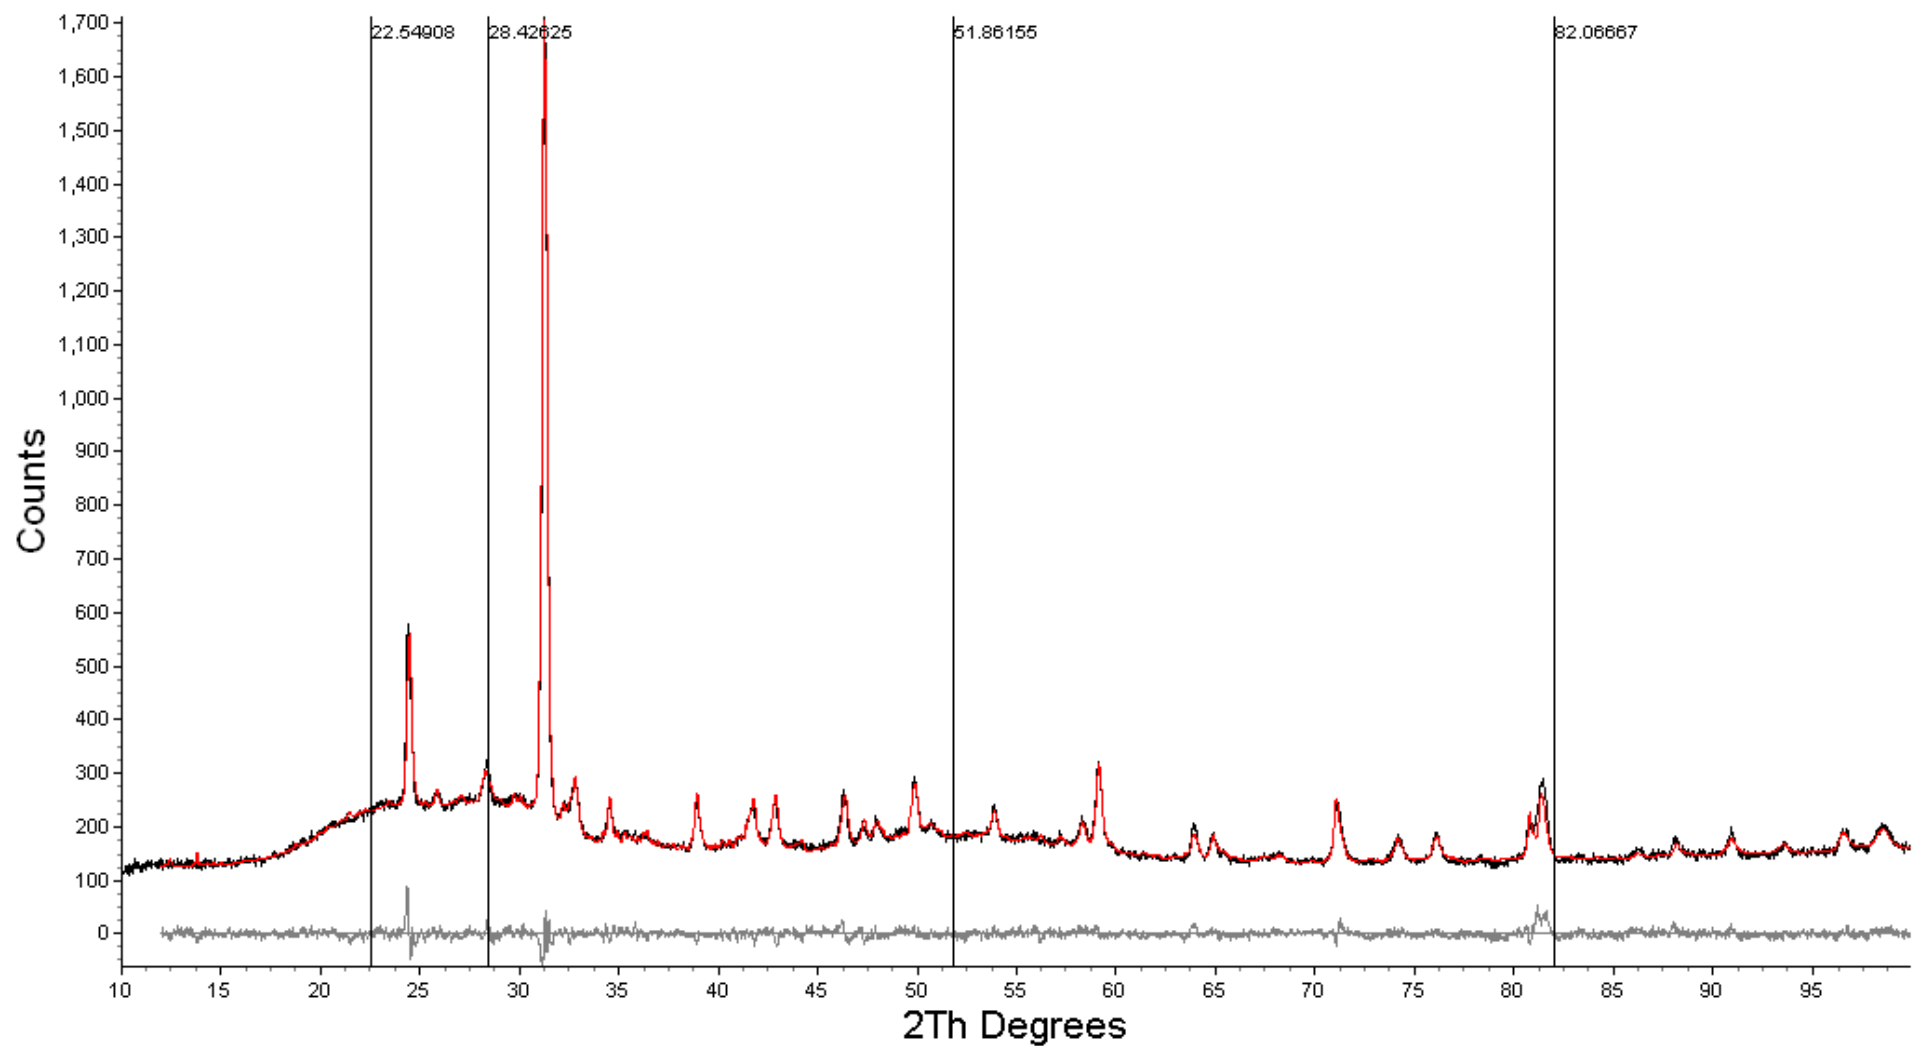

S26

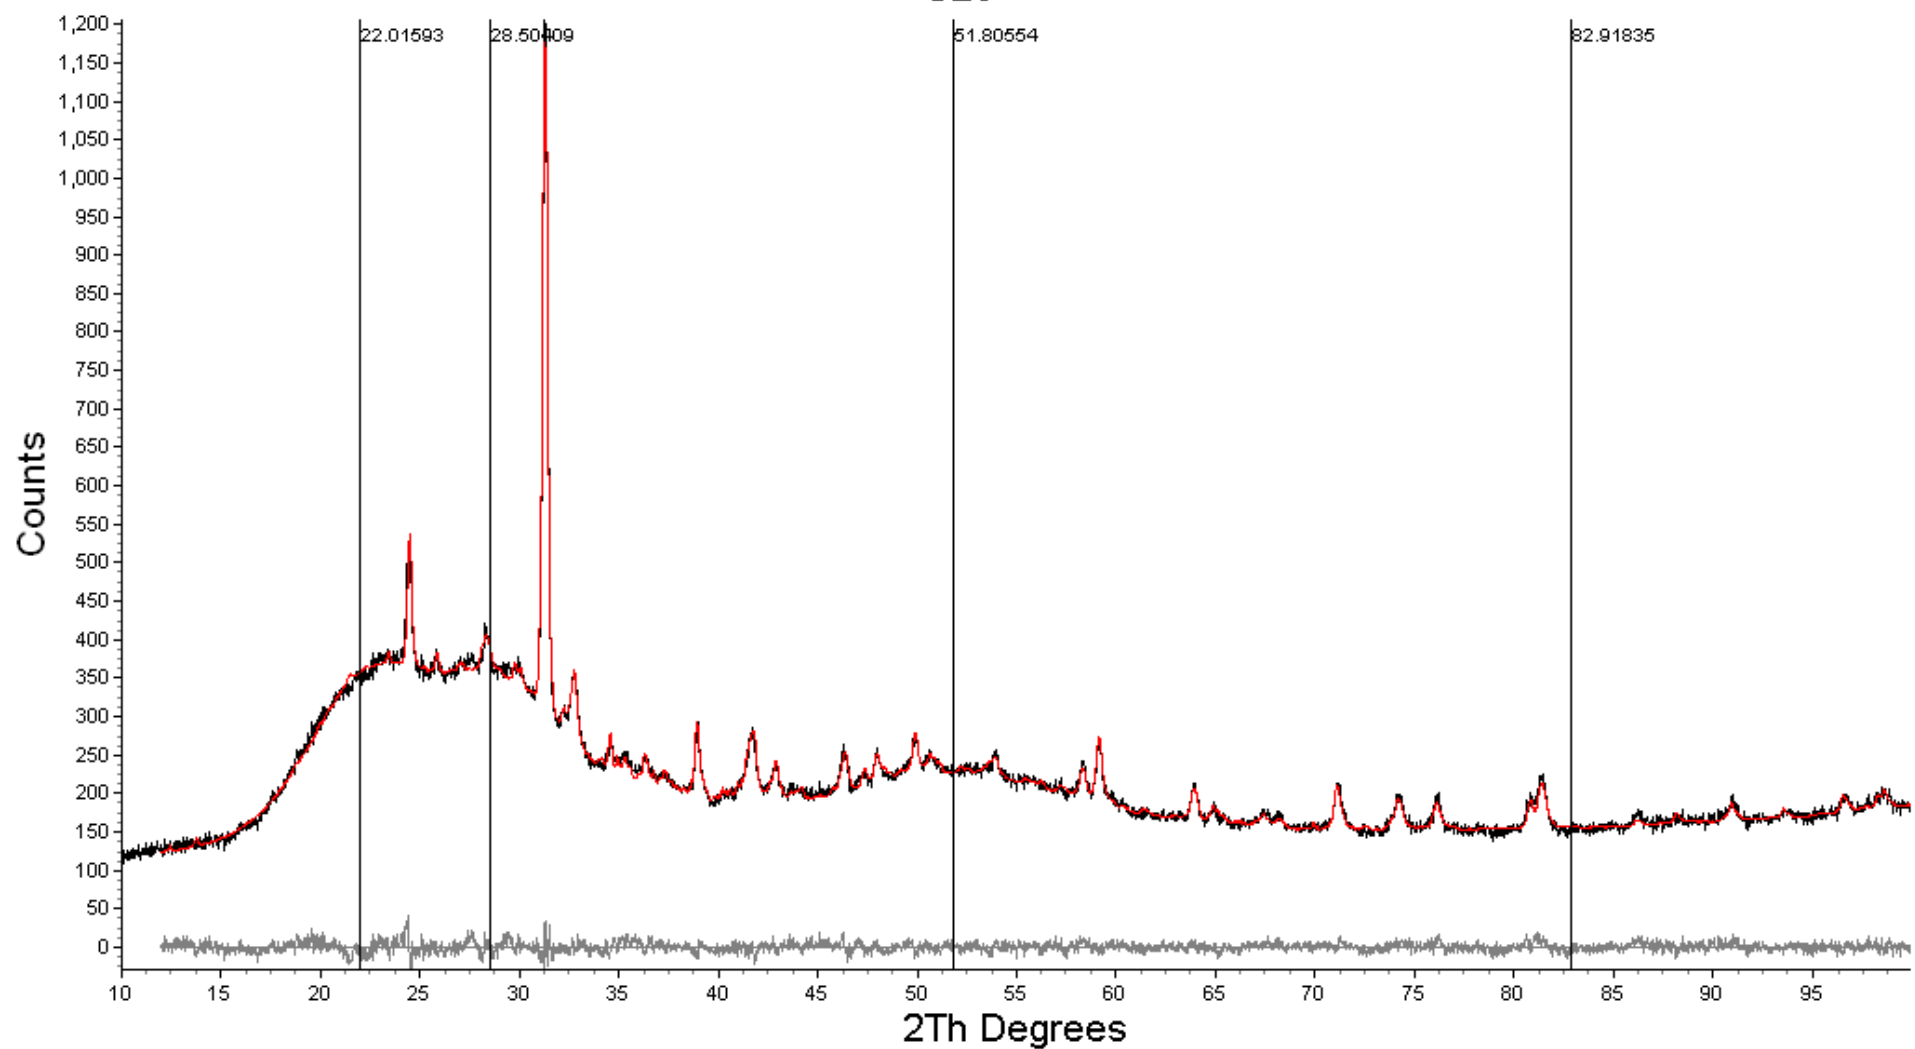

S27



S28

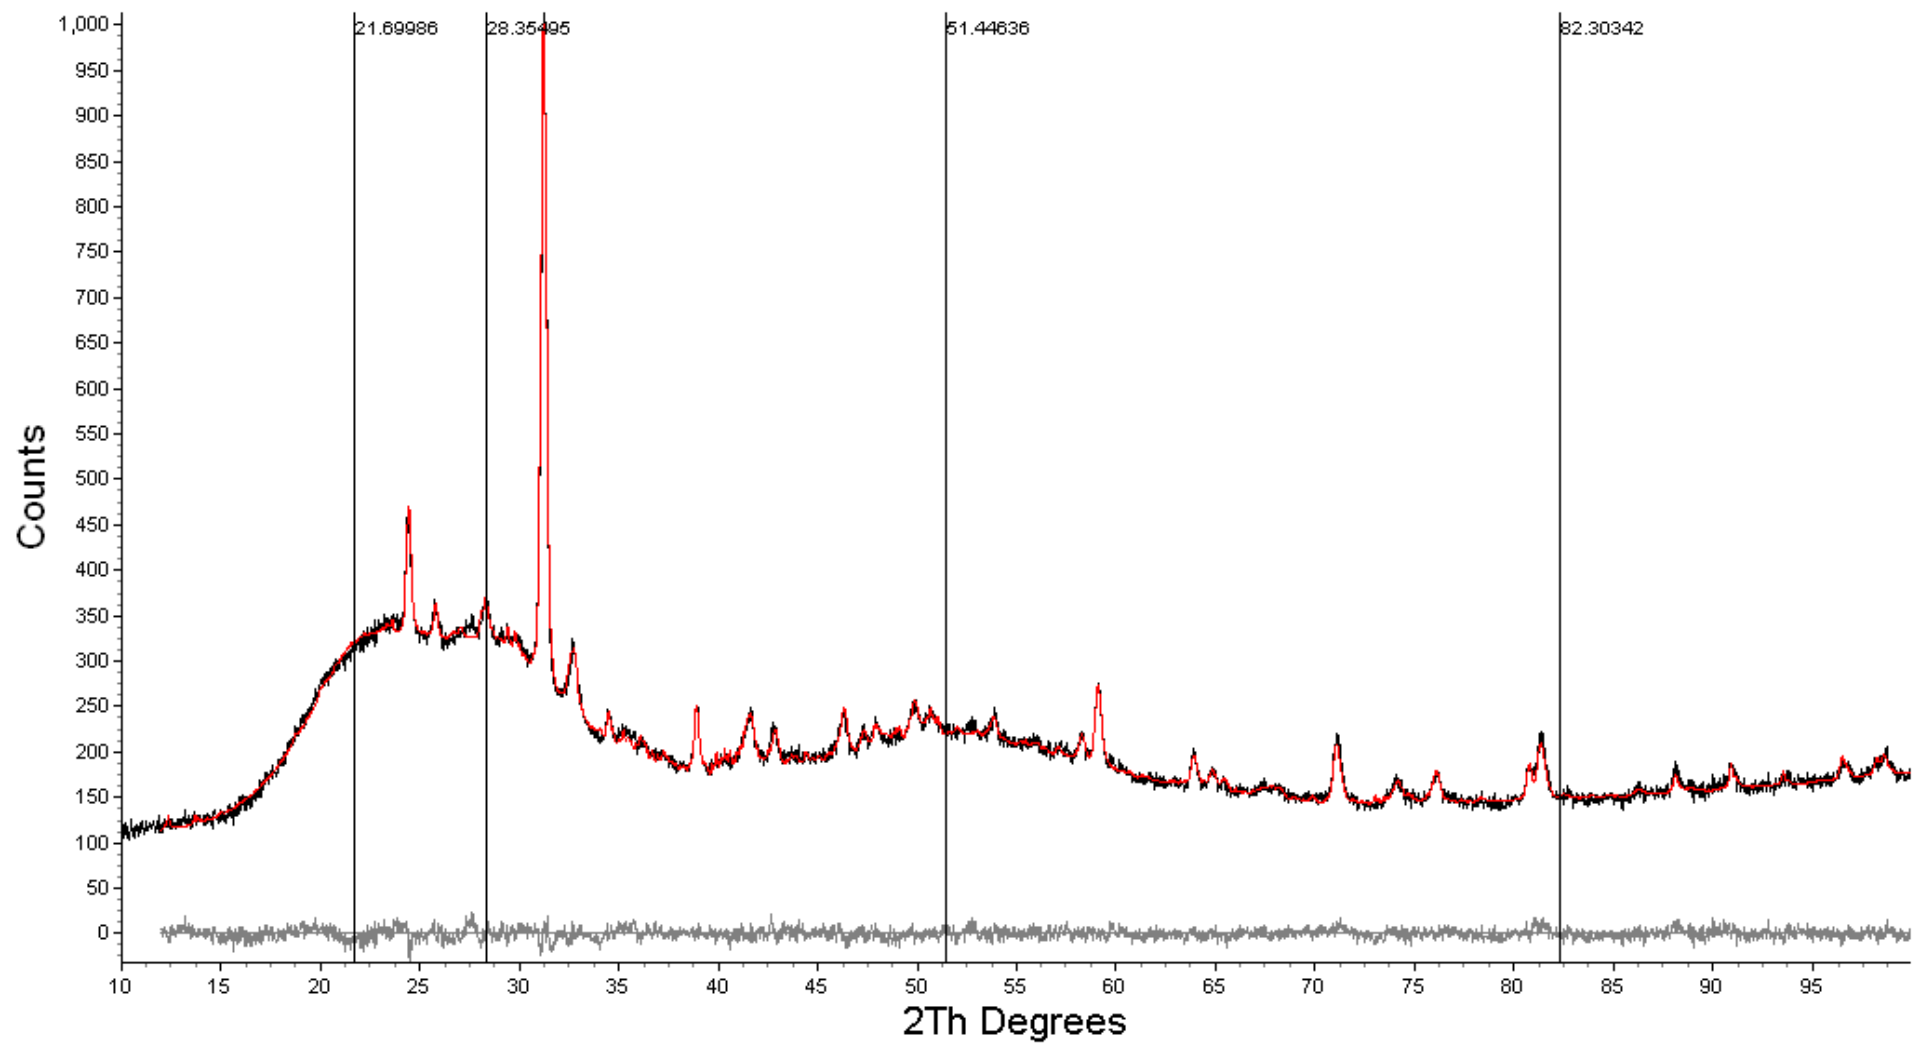



S29

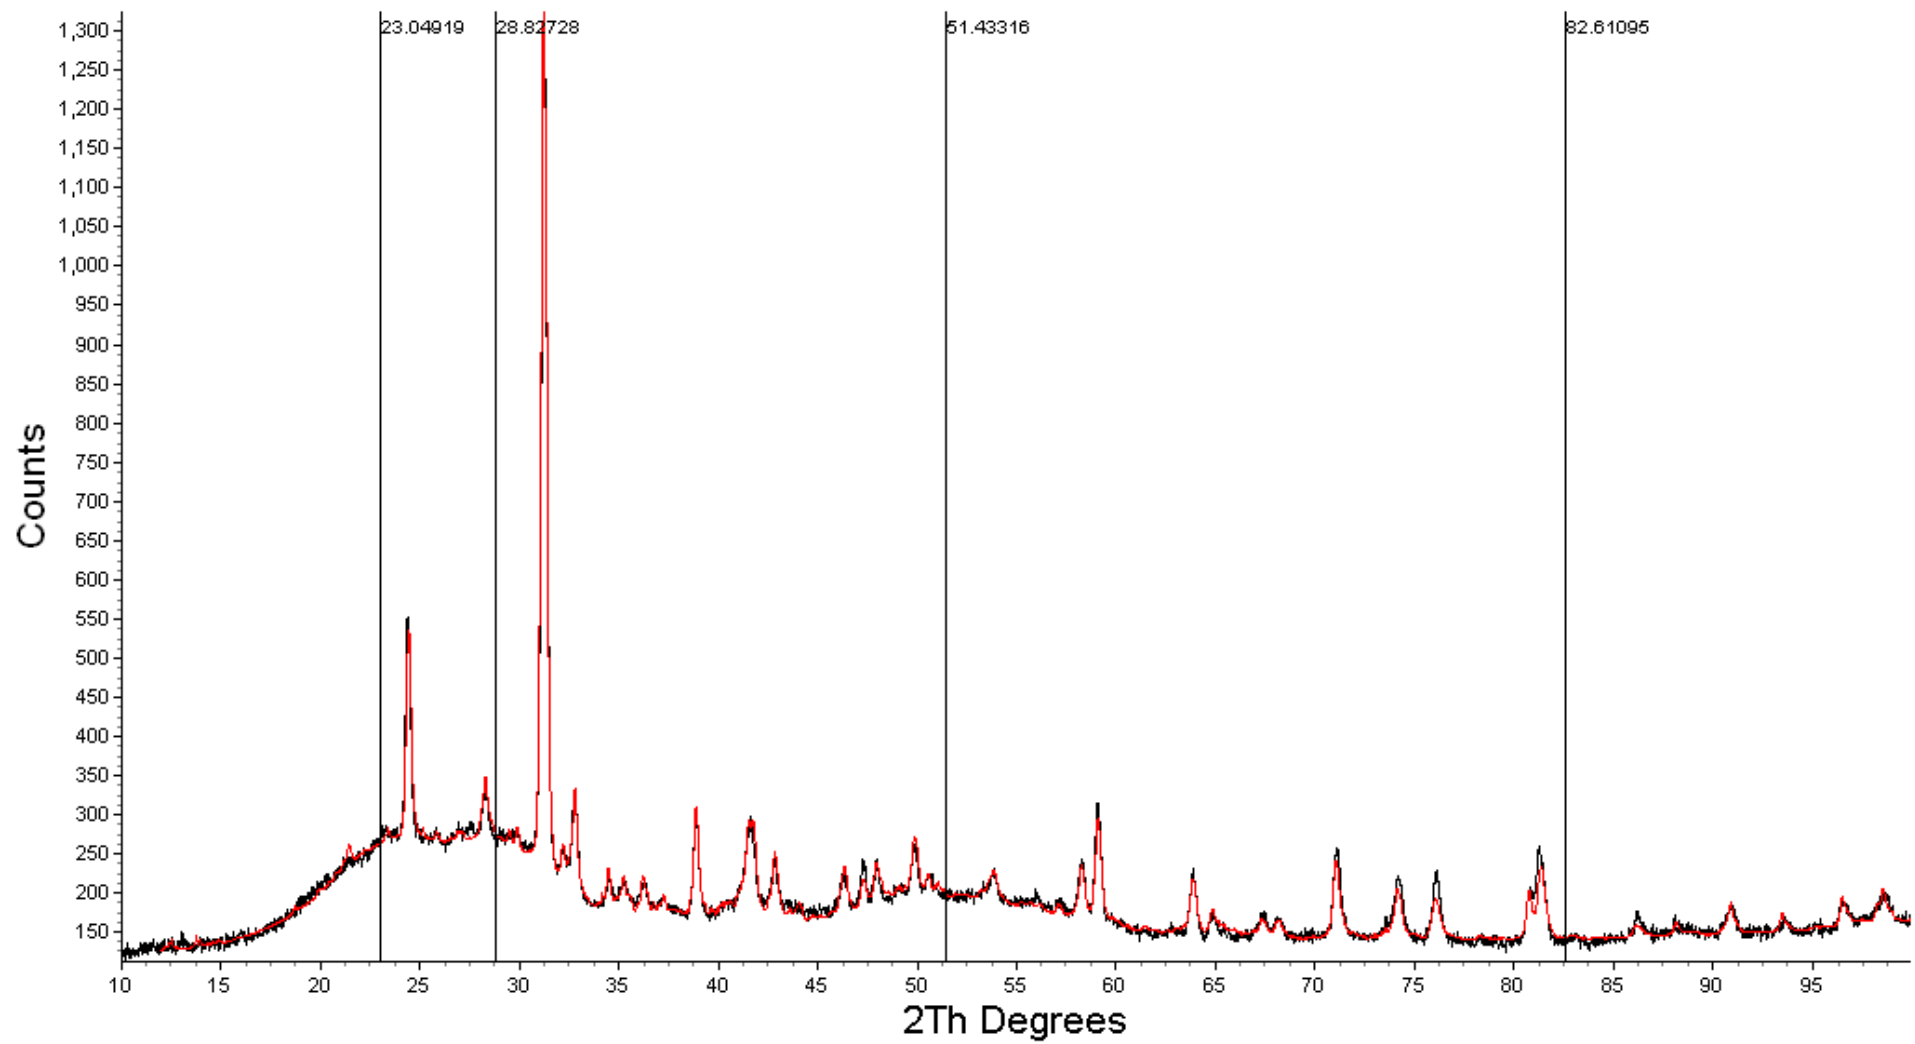

S30

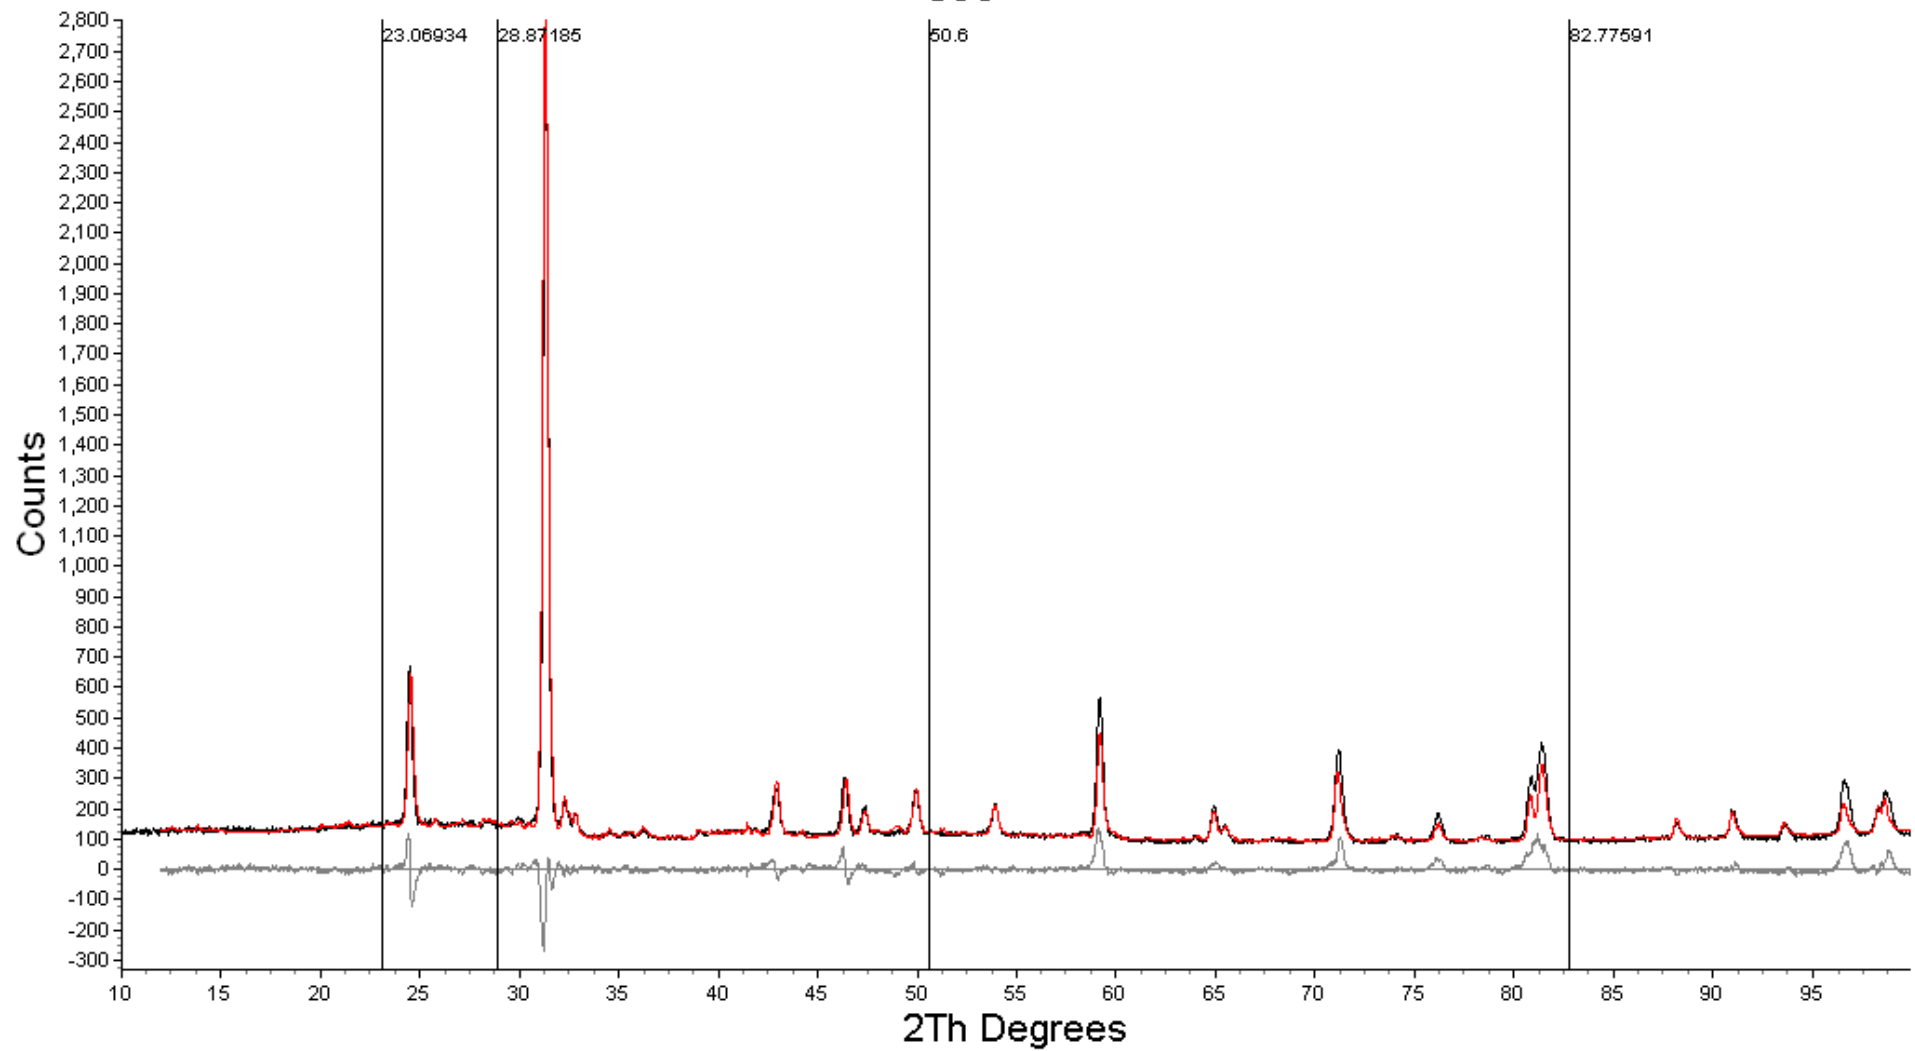

S31

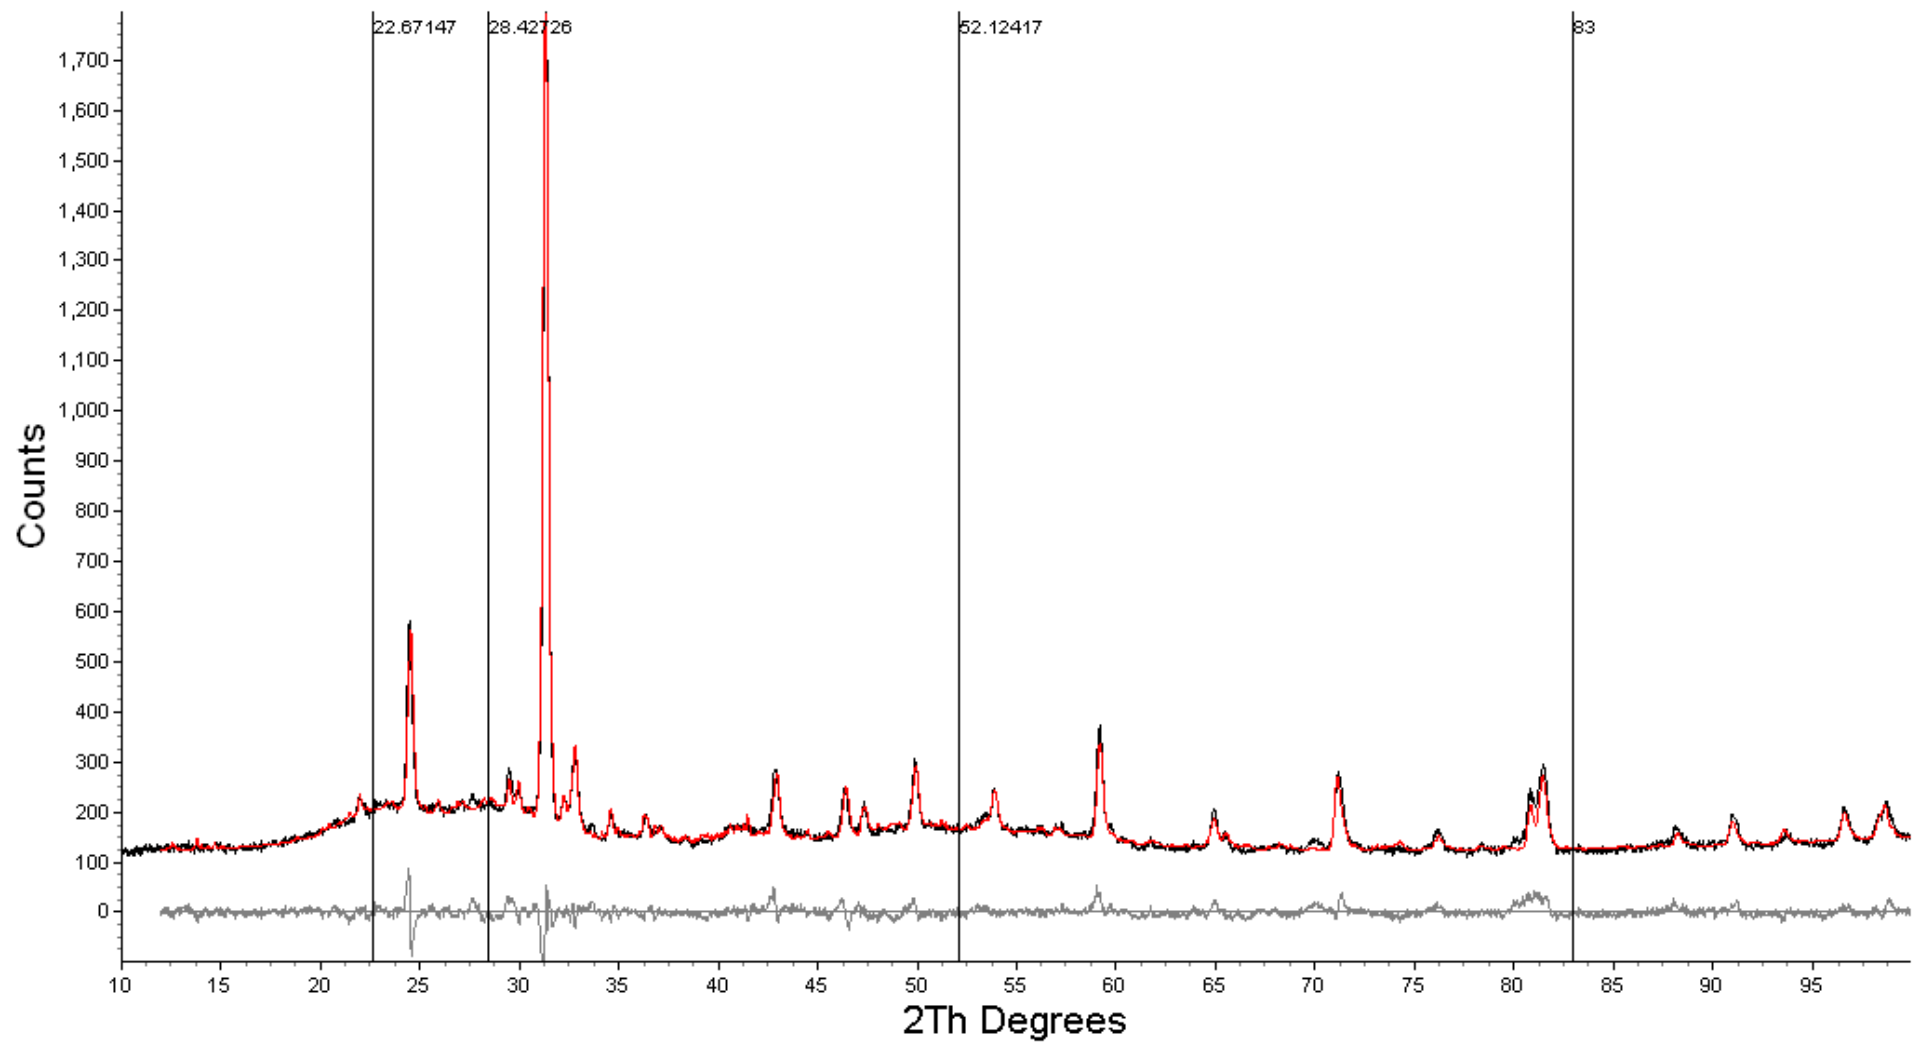

S32

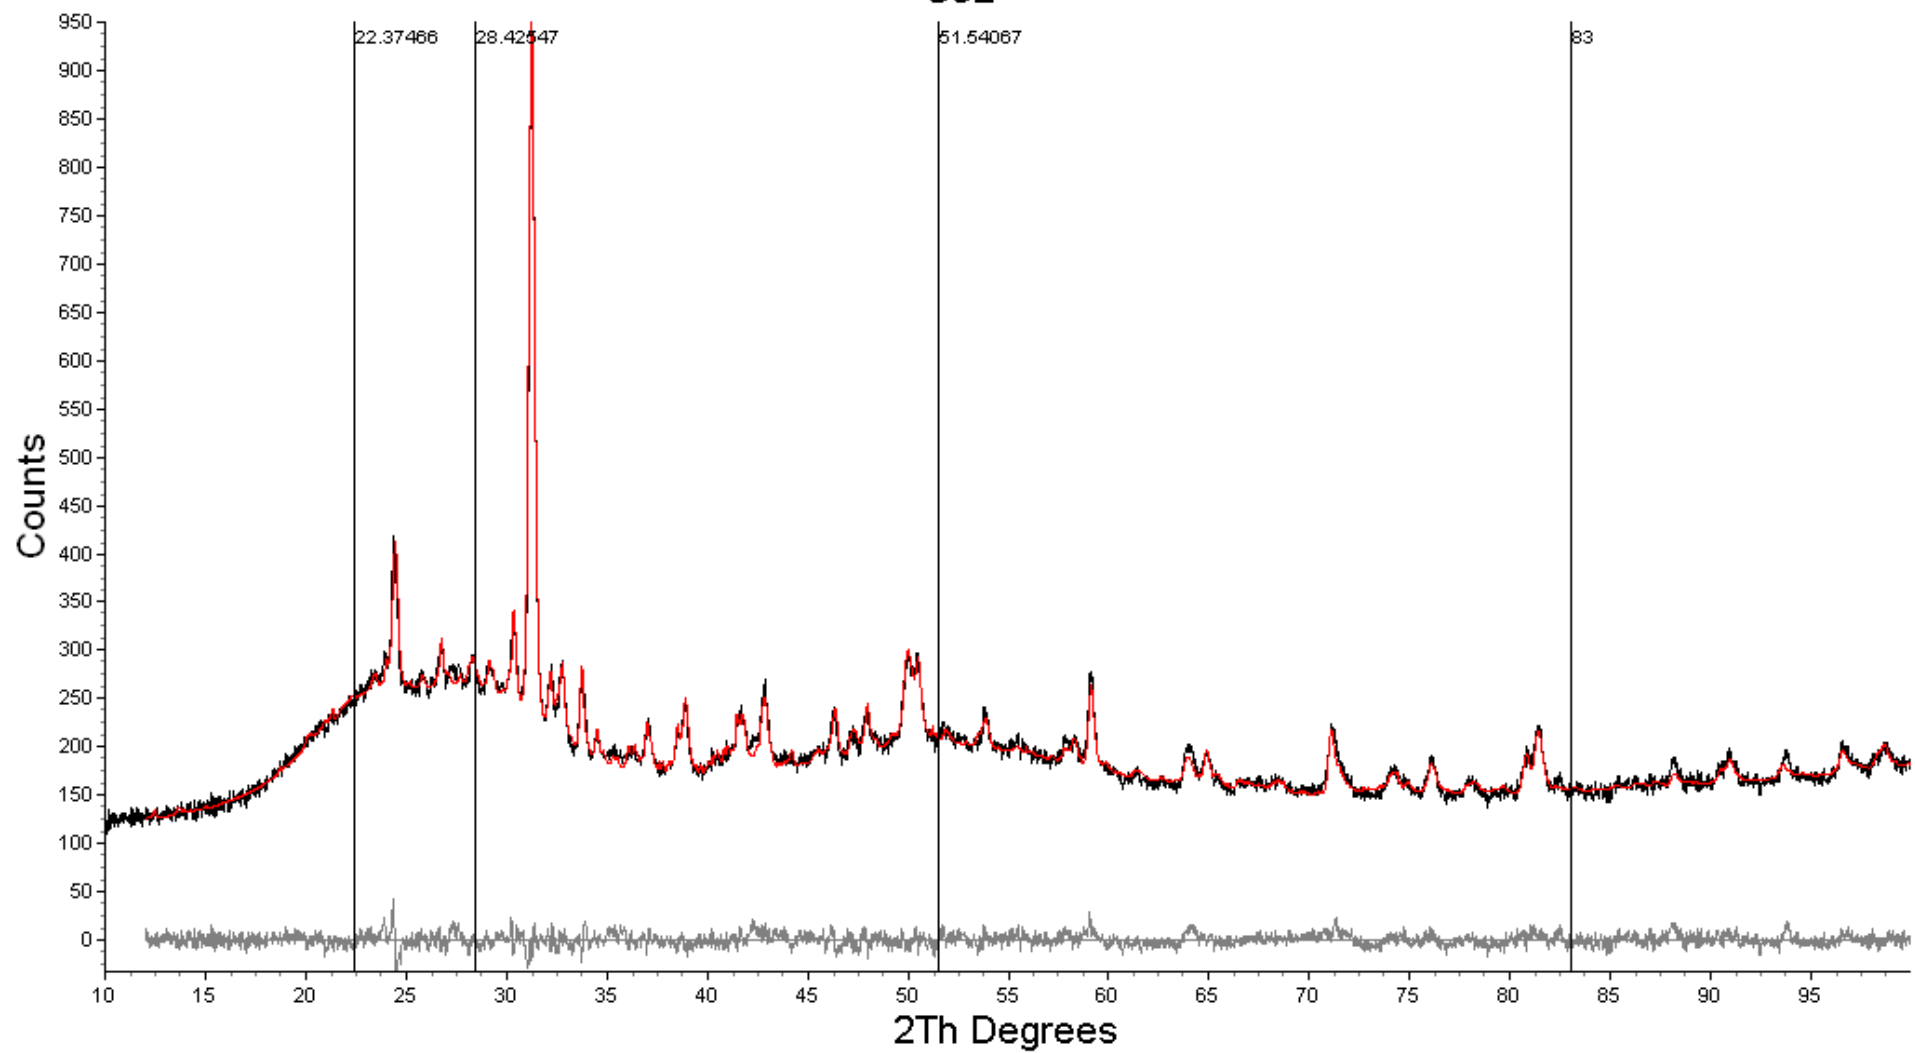

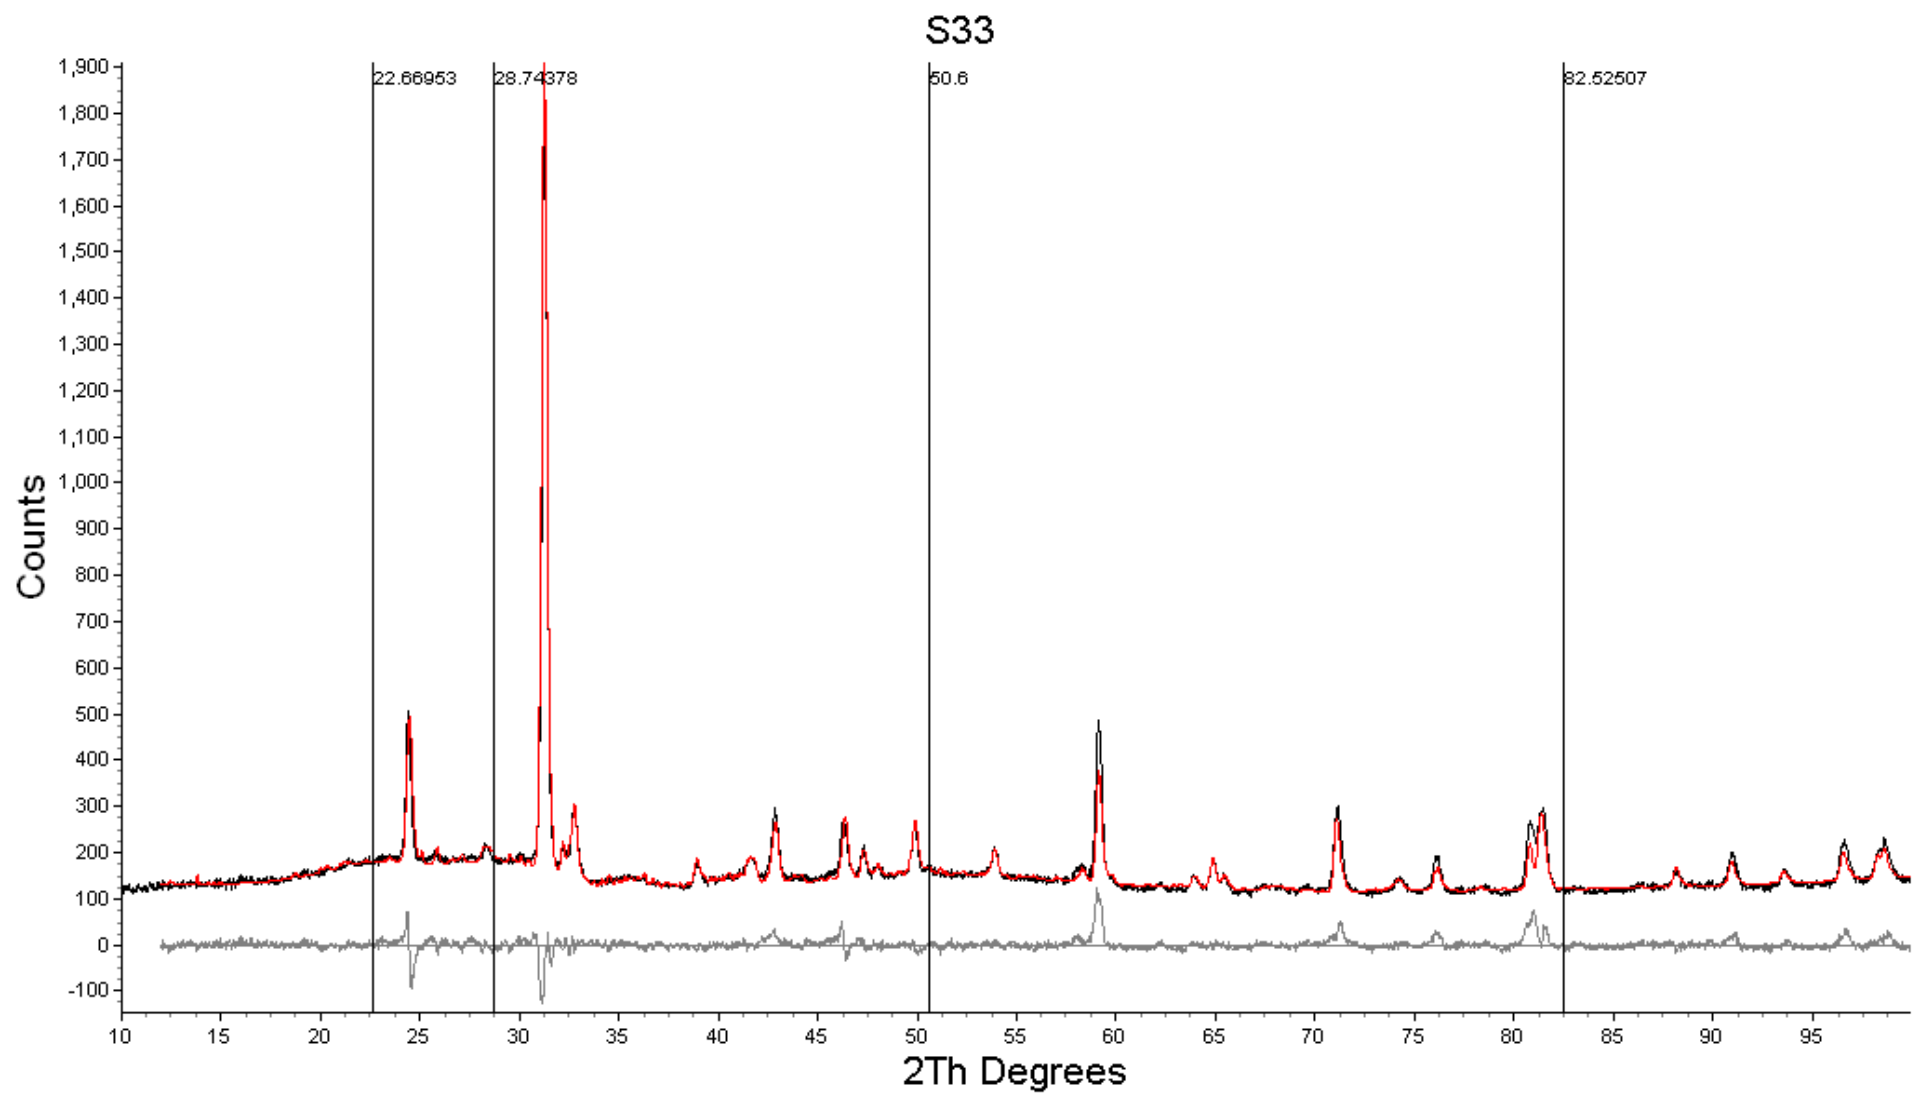

S35

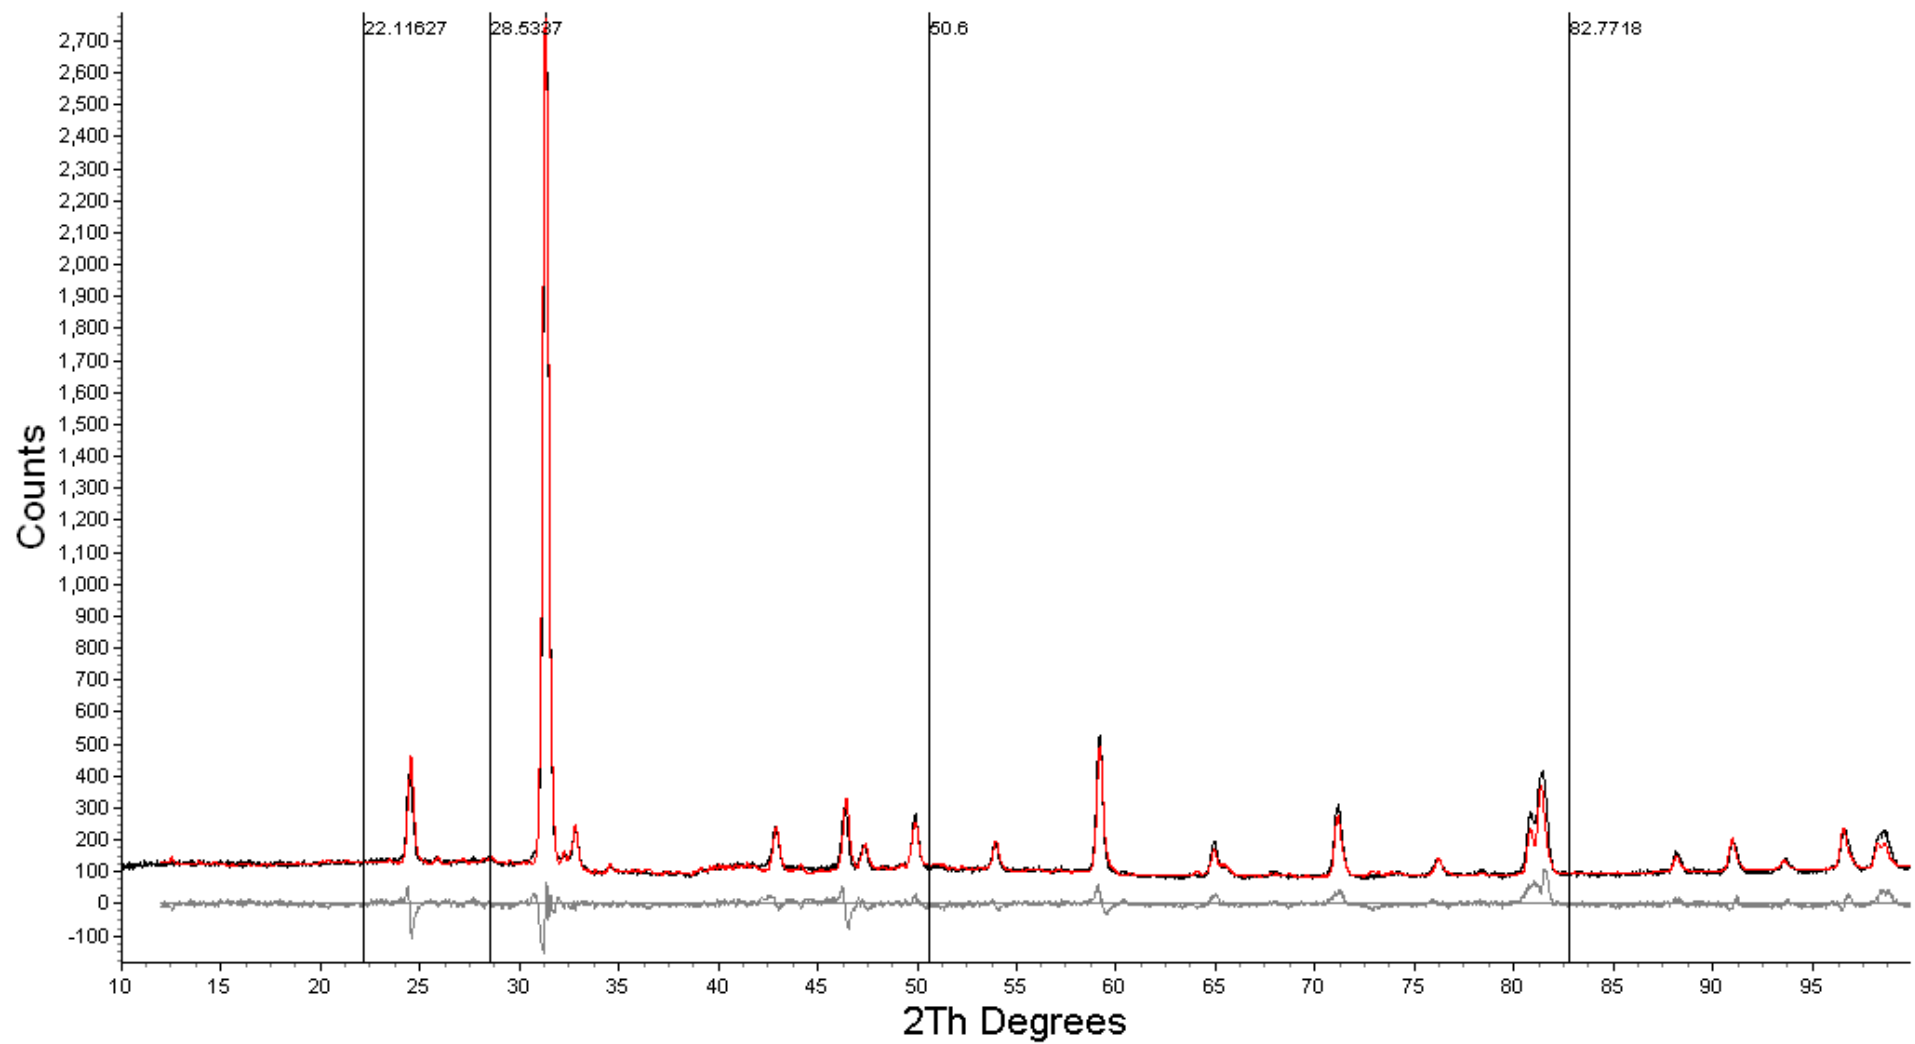

S36

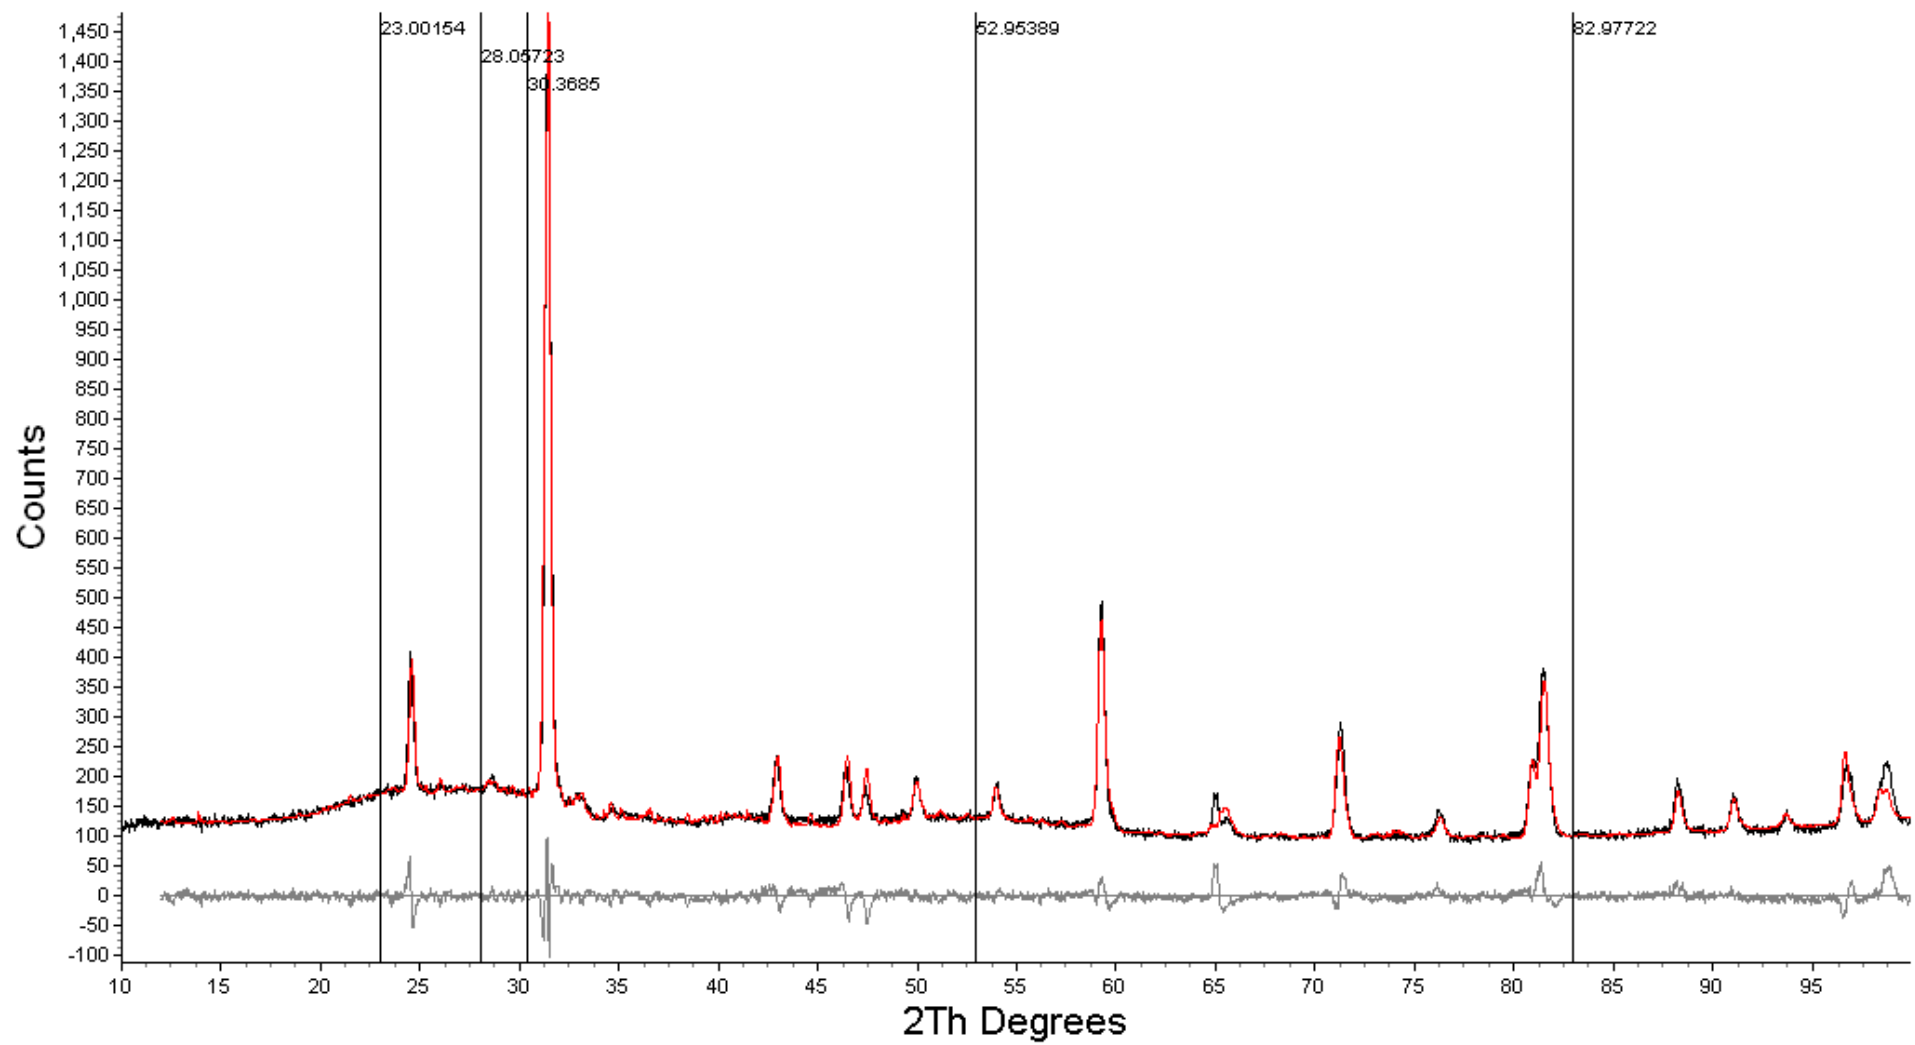

Supplement: s1 [file s1]
